# Supplementary material for: [Retracted] Identification of Paxillin as a Prognostic Factor for Glioblastoma via Integrated Bioinformatics Analysis
Source: Hindawi journal article supplement (doi:10.1155/2022/7171126), 2022-01-01
Supplement: f1 [file 7171126.f1.pdf]

Table S1. Genes significantly associated with overall survival in CGGA database.

| Gene          | KM.pvalue | HR    | 95% CI      | Cox.pvalue |
|---------------|-----------|-------|-------------|------------|
| CLDN15        | <0.001    | 1.354 | 1.211~1.513 | <0.001     |
| LRAT          | <0.001    | 1.287 | 1.171~1.415 | <0.001     |
| ENTPD8        | <0.001    | 1.381 | 1.173~1.625 | <0.001     |
| C4A-AS1       | <0.001    | 1.283 | 1.172~1.406 | <0.001     |
| RP5-1160K1.6  | <0.001    | 1.742 | 1.435~2.115 | <0.001     |
| C4B-AS1       | <0.001    | 1.292 | 1.180~1.415 | <0.001     |
| PPA2          | <0.001    | 1.239 | 1.099~1.398 | <0.001     |
| LINC01004     | <0.001    | 1.258 | 1.139~1.390 | <0.001     |
| ARTN          | <0.001    | 1.314 | 1.197~1.443 | <0.001     |
| FAM124B       | <0.001    | 1.754 | 1.490~2.065 | <0.001     |
| FBXL7         | <0.001    | 1.406 | 1.250~1.581 | <0.001     |
| TMEM243       | <0.001    | 1.423 | 1.266~1.600 | <0.001     |
| CNPY1         | <0.001    | 1.509 | 1.390~1.638 | <0.001     |
| MUTYH         | <0.001    | 1.446 | 1.294~1.616 | <0.001     |
| IQUB          | <0.001    | 1.818 | 1.481~2.231 | <0.001     |
| PPP1R7        | <0.001    | 0.827 | 0.766~0.892 | <0.001     |
| WDR93         | <0.001    | 1.573 | 1.369~1.808 | <0.001     |
| CYP21A1P      | <0.001    | 1.204 | 1.108~1.308 | <0.001     |
| GS1-114I9.1   | <0.001    | 1.319 | 1.219~1.427 | <0.001     |
| ZNF232        | <0.001    | 1.617 | 1.398~1.871 | <0.001     |
| ANKUB1        | <0.001    | 1.432 | 1.241~1.653 | <0.001     |
| ROGDI         | <0.001    | 0.814 | 0.756~0.877 | <0.001     |
| TTC34         | <0.001    | 1.742 | 1.493~2.031 | <0.001     |
| YBX1P10       | <0.001    | 1.387 | 1.162~1.655 | <0.001     |
| CCDC65        | <0.001    | 1.443 | 1.311~1.590 | <0.001     |
| RP11-145M9.4  | <0.001    | 1.215 | 1.118~1.320 | <0.001     |
| IGDCC4        | <0.001    | 1.323 | 1.215~1.440 | <0.001     |
| NUPL2         | <0.001    | 1.288 | 1.165~1.425 | <0.001     |
| CTD-2260A17.2 | <0.001    | 0.522 | 0.436~0.624 | <0.001     |
| LRCH4         | <0.001    | 1.323 | 1.206~1.451 | <0.001     |
| SDCCAG3       | <0.001    | 1.523 | 1.348~1.721 | <0.001     |
| SFPQ          | <0.001    | 1.345 | 1.217~1.486 | <0.001     |
| CTC-273B12.8  | <0.001    | 1.230 | 1.154~1.311 | <0.001     |
| ZNF503        | <0.001    | 1.393 | 1.263~1.536 | <0.001     |
| RALBP1        | <0.001    | 1.308 | 1.168~1.465 | <0.001     |
| SIX1          | <0.001    | 1.355 | 1.245~1.475 | <0.001     |
| AC012363.7    | <0.001    | 3.291 | 2.497~4.339 | <0.001     |
| PI15          | <0.001    | 1.432 | 1.281~1.600 | <0.001     |
| RGMB-AS1      | <0.001    | 0.646 | 0.567~0.736 | <0.001     |
| RP11-5C23.2   | <0.001    | 1.698 | 1.512~1.906 | <0.001     |
| AC003090.1    | <0.001    | 1.678 | 1.486~1.894 | <0.001     |
| GON4L         | <0.001    | 1.788 | 1.521~2.102 | <0.001     |
| CEL           | <0.001    | 1.633 | 1.410~1.892 | <0.001     |
| RP11-387M24.5 | <0.001    | 1.467 | 1.297~1.661 | <0.001     |
| SLC7A9        | <0.001    | 1.578 | 1.379~1.807 | <0.001     |
| RP11-418J17.1 | <0.001    | 1.535 | 1.343~1.753 | <0.001     |
| PLEKHA7       | <0.001    | 1.332 | 1.214~1.462 | <0.001     |
| AC012307.3    | <0.001    | 1.594 | 1.314~1.935 | <0.001     |
| PAQR7         | <0.001    | 1.505 | 1.291~1.754 | <0.001     |
| UNC119B       | <0.001    | 1.420 | 1.254~1.608 | <0.001     |

|               |        |       |             |        |
|---------------|--------|-------|-------------|--------|
| PLA2G6        | <0.001 | 0.707 | 0.636~0.785 | <0.001 |
| PRORS1P       | <0.001 | 1.514 | 1.275~1.798 | <0.001 |
| LARP1B        | <0.001 | 1.831 | 1.564~2.143 | <0.001 |
| CCDC135       | <0.001 | 1.364 | 1.250~1.489 | <0.001 |
| ZNF30         | <0.001 | 1.655 | 1.401~1.956 | <0.001 |
| ZRANB2-AS2    | <0.001 | 1.801 | 1.457~2.225 | <0.001 |
| GALNT10       | <0.001 | 1.386 | 1.252~1.533 | <0.001 |
| EPHX3         | <0.001 | 1.990 | 1.638~2.418 | <0.001 |
| MOB1B         | <0.001 | 1.430 | 1.257~1.628 | <0.001 |
| ZDHHC8        | <0.001 | 1.386 | 1.231~1.562 | <0.001 |
| KIAA1522      | <0.001 | 1.265 | 1.150~1.391 | <0.001 |
| RPS6KA3       | <0.001 | 1.624 | 1.452~1.817 | <0.001 |
| GPR132        | <0.001 | 1.483 | 1.291~1.705 | <0.001 |
| RP11-485G7.6  | <0.001 | 2.217 | 1.626~3.022 | <0.001 |
| ZNF486        | <0.001 | 1.662 | 1.440~1.916 | <0.001 |
| C4B           | <0.001 | 1.135 | 1.084~1.188 | <0.001 |
| ACADL         | <0.001 | 1.714 | 1.516~1.937 | <0.001 |
| MFSD1         | <0.001 | 1.428 | 1.294~1.576 | <0.001 |
| ITGB4         | <0.001 | 1.179 | 1.119~1.242 | <0.001 |
| SCARF1        | <0.001 | 1.537 | 1.347~1.754 | <0.001 |
| ZNF707        | <0.001 | 1.547 | 1.341~1.784 | <0.001 |
| FOXC1         | <0.001 | 1.374 | 1.244~1.518 | <0.001 |
| FZD4          | <0.001 | 1.483 | 1.264~1.741 | <0.001 |
| ISYNA1        | <0.001 | 1.304 | 1.212~1.402 | <0.001 |
| AR            | <0.001 | 1.427 | 1.281~1.590 | <0.001 |
| NOTCH2        | <0.001 | 1.374 | 1.246~1.515 | <0.001 |
| PTPRF         | <0.001 | 1.467 | 1.319~1.630 | <0.001 |
| RILPL2        | <0.001 | 1.440 | 1.279~1.622 | <0.001 |
| VSTM1         | <0.001 | 1.450 | 1.270~1.655 | <0.001 |
| PIGW          | <0.001 | 1.558 | 1.376~1.765 | <0.001 |
| ZFP82         | <0.001 | 1.438 | 1.257~1.646 | <0.001 |
| CERKL         | <0.001 | 1.380 | 1.233~1.544 | <0.001 |
| C1orf53       | <0.001 | 1.325 | 1.211~1.449 | <0.001 |
| SUN1          | <0.001 | 1.522 | 1.347~1.719 | <0.001 |
| NOS3          | <0.001 | 1.369 | 1.245~1.505 | <0.001 |
| PLCG2         | <0.001 | 1.457 | 1.301~1.632 | <0.001 |
| BIN2          | <0.001 | 1.363 | 1.240~1.498 | <0.001 |
| GSPT1         | <0.001 | 1.410 | 1.257~1.581 | <0.001 |
| SPIDR         | <0.001 | 1.441 | 1.279~1.625 | <0.001 |
| CCBL2         | <0.001 | 1.436 | 1.286~1.604 | <0.001 |
| BCAP29        | <0.001 | 1.223 | 1.131~1.324 | <0.001 |
| C1orf162      | <0.001 | 1.244 | 1.165~1.327 | <0.001 |
| FIZ1          | <0.001 | 1.544 | 1.333~1.790 | <0.001 |
| AL031663.2    | <0.001 | 1.839 | 1.491~2.268 | <0.001 |
| ABCB7         | <0.001 | 1.603 | 1.388~1.851 | <0.001 |
| CD3G          | <0.001 | 1.337 | 1.128~1.585 | <0.001 |
| RP11-713M15.2 | <0.001 | 1.796 | 1.474~2.188 | <0.001 |
| PHLDB3        | <0.001 | 1.371 | 1.236~1.521 | <0.001 |
| WDR90         | <0.001 | 1.384 | 1.270~1.509 | <0.001 |
| ZNF789        | <0.001 | 1.495 | 1.329~1.682 | <0.001 |
| FDX1          | <0.001 | 1.434 | 1.259~1.633 | <0.001 |
| KDR           | <0.001 | 1.406 | 1.273~1.554 | <0.001 |

|               |        |       |             |        |
|---------------|--------|-------|-------------|--------|
| KCNA4         | <0.001 | 0.557 | 0.446~0.696 | <0.001 |
| FASTKD5       | <0.001 | 1.651 | 1.432~1.904 | <0.001 |
| ANKRD35       | <0.001 | 1.317 | 1.214~1.429 | <0.001 |
| TBC1D2B       | <0.001 | 1.619 | 1.405~1.866 | <0.001 |
| PHYH          | <0.001 | 1.388 | 1.258~1.531 | <0.001 |
| RP11-58A12.3  | <0.001 | 1.671 | 1.473~1.895 | <0.001 |
| RP11-108L7.15 | <0.001 | 2.068 | 1.736~2.463 | <0.001 |
| RP11-977B10.2 | <0.001 | 2.200 | 1.744~2.774 | <0.001 |
| AC000123.4    | <0.001 | 2.113 | 1.720~2.596 | <0.001 |
| SLC16A5       | <0.001 | 1.455 | 1.252~1.691 | <0.001 |
| PIPOX         | <0.001 | 1.348 | 1.252~1.451 | <0.001 |
| CTD-2320G14.2 | <0.001 | 0.398 | 0.303~0.524 | <0.001 |
| ZNF543        | <0.001 | 1.719 | 1.450~2.038 | <0.001 |
| SDHB          | <0.001 | 1.314 | 1.178~1.466 | <0.001 |
| ZNF563        | <0.001 | 2.276 | 1.784~2.904 | <0.001 |
| RIPK3         | <0.001 | 1.444 | 1.294~1.611 | <0.001 |
| C7orf43       | <0.001 | 1.500 | 1.337~1.682 | <0.001 |
| MTERF         | <0.001 | 1.821 | 1.590~2.084 | <0.001 |
| RP11-157J24.2 | <0.001 | 1.574 | 1.400~1.769 | <0.001 |
| RP11-177C12.1 | <0.001 | 3.322 | 2.390~4.618 | <0.001 |
| ZNF77         | <0.001 | 1.830 | 1.541~2.174 | <0.001 |
| CEP164        | <0.001 | 1.601 | 1.403~1.827 | <0.001 |
| SNAPC1        | <0.001 | 1.704 | 1.467~1.980 | <0.001 |
| CLDN1         | <0.001 | 1.482 | 1.322~1.660 | <0.001 |
| ZNF256        | <0.001 | 1.708 | 1.477~1.974 | <0.001 |
| AQP3          | <0.001 | 1.334 | 1.208~1.472 | <0.001 |
| OSBPL10       | <0.001 | 1.380 | 1.254~1.517 | <0.001 |
| THADA         | <0.001 | 1.447 | 1.272~1.646 | <0.001 |
| RP4-761J14.10 | <0.001 | 1.387 | 1.252~1.537 | <0.001 |
| RP11-459I19.1 | <0.001 | 1.534 | 1.323~1.780 | <0.001 |
| TSR1          | <0.001 | 1.610 | 1.413~1.834 | <0.001 |
| USP33         | <0.001 | 1.506 | 1.304~1.740 | <0.001 |
| TEFM          | <0.001 | 1.419 | 1.247~1.615 | <0.001 |
| FAM95B1       | <0.001 | 1.250 | 1.173~1.331 | <0.001 |
| LINC00959     | <0.001 | 0.277 | 0.187~0.409 | <0.001 |
| EID2          | <0.001 | 1.350 | 1.221~1.493 | <0.001 |
| LMCD1         | <0.001 | 1.336 | 1.211~1.474 | <0.001 |
| INPP5E        | <0.001 | 1.549 | 1.376~1.744 | <0.001 |
| RP11-299L17.3 | <0.001 | 1.490 | 1.351~1.643 | <0.001 |
| AD000684.2    | <0.001 | 2.133 | 1.718~2.648 | <0.001 |
| MAPK14        | <0.001 | 1.562 | 1.353~1.802 | <0.001 |
| PRIM2         | <0.001 | 1.943 | 1.684~2.243 | <0.001 |
| PAPPA         | <0.001 | 0.606 | 0.480~0.765 | <0.001 |
| HES1          | <0.001 | 1.394 | 1.277~1.522 | <0.001 |
| ZNF461        | <0.001 | 1.632 | 1.439~1.850 | <0.001 |
| RP11-385F5.5  | <0.001 | 1.557 | 1.403~1.728 | <0.001 |
| SAMHD1        | <0.001 | 1.279 | 1.159~1.411 | <0.001 |
| WARS2-IT1     | <0.001 | 1.587 | 1.381~1.823 | <0.001 |
| ZNF800        | <0.001 | 1.668 | 1.460~1.905 | <0.001 |
| ZNF821        | <0.001 | 0.767 | 0.706~0.834 | <0.001 |
| TMEM109       | <0.001 | 1.402 | 1.269~1.549 | <0.001 |
| ZNF207        | <0.001 | 1.453 | 1.296~1.628 | <0.001 |

|              |        |       |             |        |
|--------------|--------|-------|-------------|--------|
| TMEM123      | <0.001 | 1.232 | 1.130~1.342 | <0.001 |
| ARL2BP       | <0.001 | 1.378 | 1.250~1.520 | <0.001 |
| ANO4         | <0.001 | 0.718 | 0.645~0.799 | <0.001 |
| HLA-DOB      | <0.001 | 1.289 | 1.151~1.444 | <0.001 |
| STK33        | <0.001 | 1.529 | 1.382~1.692 | <0.001 |
| KIF13A       | <0.001 | 0.686 | 0.615~0.766 | <0.001 |
| TMEM168      | <0.001 | 1.462 | 1.327~1.610 | <0.001 |
| F5           | <0.001 | 0.760 | 0.712~0.812 | <0.001 |
| BANK1        | <0.001 | 1.881 | 1.617~2.188 | <0.001 |
| PARD6G       | <0.001 | 1.588 | 1.379~1.828 | <0.001 |
| PCDHGC4      | <0.001 | 0.782 | 0.734~0.834 | <0.001 |
| PKIA         | <0.001 | 0.809 | 0.758~0.863 | <0.001 |
| ARHGEF35     | <0.001 | 1.356 | 1.166~1.578 | <0.001 |
| HSD17B13     | <0.001 | 2.989 | 2.158~4.139 | <0.001 |
| MPLKIP       | <0.001 | 1.776 | 1.476~2.136 | <0.001 |
| B3GNT2       | <0.001 | 1.430 | 1.272~1.606 | <0.001 |
| CCDC81       | <0.001 | 1.533 | 1.342~1.751 | <0.001 |
| KLHL35       | <0.001 | 0.737 | 0.675~0.804 | <0.001 |
| RP11-79P5.2  | <0.001 | 1.212 | 1.143~1.284 | <0.001 |
| HLA-E        | <0.001 | 1.284 | 1.176~1.401 | <0.001 |
| DISP1        | <0.001 | 1.602 | 1.378~1.863 | <0.001 |
| ANKRD11      | <0.001 | 1.697 | 1.455~1.980 | <0.001 |
| SMC2         | <0.001 | 1.403 | 1.268~1.551 | <0.001 |
| RDH5         | <0.001 | 1.442 | 1.330~1.563 | <0.001 |
| ZNF140       | <0.001 | 1.434 | 1.273~1.615 | <0.001 |
| EFHC2        | <0.001 | 1.417 | 1.290~1.557 | <0.001 |
| PHLDB2       | <0.001 | 1.525 | 1.339~1.737 | <0.001 |
| BBS12        | <0.001 | 1.991 | 1.641~2.416 | <0.001 |
| ADAT1        | <0.001 | 1.589 | 1.371~1.841 | <0.001 |
| ZNF350       | <0.001 | 1.628 | 1.377~1.925 | <0.001 |
| AATK         | <0.001 | 0.819 | 0.772~0.869 | <0.001 |
| RAE1         | <0.001 | 1.504 | 1.308~1.730 | <0.001 |
| TMED6        | <0.001 | 2.197 | 1.634~2.953 | <0.001 |
| PPP5C        | <0.001 | 1.564 | 1.375~1.779 | <0.001 |
| RP1-286D6.5  | <0.001 | 1.660 | 1.473~1.870 | <0.001 |
| VAV2         | <0.001 | 1.451 | 1.321~1.594 | <0.001 |
| CRISPLD1     | <0.001 | 1.301 | 1.217~1.391 | <0.001 |
| ANK3         | <0.001 | 0.820 | 0.764~0.881 | <0.001 |
| RPA1         | <0.001 | 1.593 | 1.404~1.808 | <0.001 |
| ARHGAP15     | <0.001 | 1.379 | 1.258~1.511 | <0.001 |
| PPAT         | <0.001 | 1.372 | 1.258~1.497 | <0.001 |
| XAF1         | <0.001 | 1.330 | 1.239~1.429 | <0.001 |
| HCP5         | <0.001 | 1.415 | 1.295~1.546 | <0.001 |
| ELN          | <0.001 | 1.250 | 1.170~1.337 | <0.001 |
| GUCY1A3      | <0.001 | 0.710 | 0.648~0.779 | <0.001 |
| MAGEB17      | <0.001 | 1.546 | 1.288~1.856 | <0.001 |
| ZNF132       | <0.001 | 1.811 | 1.520~2.158 | <0.001 |
| C4orf33      | <0.001 | 1.396 | 1.246~1.564 | <0.001 |
| ASTE1        | <0.001 | 1.745 | 1.461~2.085 | <0.001 |
| CTD-2006C1.2 | <0.001 | 1.408 | 1.270~1.562 | <0.001 |
| IRF3         | <0.001 | 1.225 | 1.139~1.317 | <0.001 |
| ARAF         | <0.001 | 1.160 | 1.072~1.255 | <0.001 |

|                |        |       |             |        |
|----------------|--------|-------|-------------|--------|
| SRGN           | <0.001 | 1.215 | 1.148~1.286 | <0.001 |
| RP11-893F2.14  | <0.001 | 1.532 | 1.348~1.741 | <0.001 |
| GPR171         | <0.001 | 1.500 | 1.241~1.813 | <0.001 |
| ACCS           | <0.001 | 1.384 | 1.271~1.507 | <0.001 |
| NUP188         | <0.001 | 1.645 | 1.457~1.856 | <0.001 |
| KANSL3         | <0.001 | 1.707 | 1.420~2.051 | <0.001 |
| GNPAT          | <0.001 | 1.393 | 1.231~1.577 | <0.001 |
| CDH2           | <0.001 | 1.376 | 1.261~1.502 | <0.001 |
| MFS10          | <0.001 | 1.376 | 1.263~1.499 | <0.001 |
| GALNT1         | <0.001 | 1.392 | 1.255~1.543 | <0.001 |
| C10orf11       | <0.001 | 1.356 | 1.233~1.491 | <0.001 |
| MKRN7P         | <0.001 | 1.892 | 1.585~2.259 | <0.001 |
| DGCR8          | <0.001 | 1.703 | 1.486~1.950 | <0.001 |
| INSIG2         | <0.001 | 1.434 | 1.292~1.591 | <0.001 |
| PPP6C          | <0.001 | 1.324 | 1.168~1.499 | <0.001 |
| CTD-2619J13.14 | <0.001 | 1.621 | 1.411~1.861 | <0.001 |
| FZD7           | <0.001 | 1.357 | 1.268~1.451 | <0.001 |
| HEXIM1         | <0.001 | 1.552 | 1.332~1.807 | <0.001 |
| MAATS1         | <0.001 | 1.360 | 1.236~1.496 | <0.001 |
| SLC9C2         | <0.001 | 1.427 | 1.269~1.604 | <0.001 |
| DENND3         | <0.001 | 1.373 | 1.249~1.509 | <0.001 |
| TRPC4AP        | <0.001 | 1.427 | 1.193~1.707 | <0.001 |
| ESAM           | <0.001 | 1.326 | 1.216~1.445 | <0.001 |
| GDI1           | <0.001 | 0.780 | 0.703~0.867 | <0.001 |
| KLHL6          | <0.001 | 1.516 | 1.349~1.705 | <0.001 |
| RBM39          | <0.001 | 1.687 | 1.482~1.919 | <0.001 |
| VPS54          | <0.001 | 1.488 | 1.290~1.717 | <0.001 |
| SKIDA1         | <0.001 | 1.587 | 1.372~1.836 | <0.001 |
| CHST12         | <0.001 | 1.348 | 1.231~1.476 | <0.001 |
| TGFB1          | <0.001 | 1.310 | 1.210~1.419 | <0.001 |
| AC009093.1     | <0.001 | 4.068 | 2.573~6.432 | <0.001 |
| FAM101B        | <0.001 | 1.410 | 1.275~1.559 | <0.001 |
| ARHGAP9        | <0.001 | 1.336 | 1.229~1.452 | <0.001 |
| DEF6           | <0.001 | 1.331 | 1.227~1.443 | <0.001 |
| RP11-196G18.22 | <0.001 | 1.421 | 1.276~1.581 | <0.001 |
| HEBP1          | <0.001 | 1.165 | 1.085~1.251 | <0.001 |
| ALDH3A2        | <0.001 | 1.421 | 1.262~1.600 | <0.001 |
| SNAP23         | <0.001 | 1.471 | 1.294~1.672 | <0.001 |
| RP1-28H20.3    | <0.001 | 2.166 | 1.815~2.585 | <0.001 |
| USP42          | <0.001 | 1.622 | 1.413~1.862 | <0.001 |
| PPT1           | <0.001 | 1.315 | 1.183~1.461 | <0.001 |
| SCO1           | <0.001 | 1.645 | 1.402~1.931 | <0.001 |
| RTKN2          | <0.001 | 1.601 | 1.432~1.790 | <0.001 |
| OGFOD1         | <0.001 | 1.359 | 1.237~1.494 | <0.001 |
| FGFBP2         | <0.001 | 1.258 | 1.189~1.332 | <0.001 |
| SPTY2D1        | <0.001 | 1.774 | 1.515~2.078 | <0.001 |
| FAM3C          | <0.001 | 1.272 | 1.177~1.374 | <0.001 |
| C15orf26       | <0.001 | 1.521 | 1.346~1.718 | <0.001 |
| MSL3           | <0.001 | 1.494 | 1.311~1.703 | <0.001 |
| FAM222A-AS1    | <0.001 | 0.488 | 0.388~0.616 | <0.001 |
| GLTSCR1        | <0.001 | 1.569 | 1.388~1.774 | <0.001 |
| C19orf52       | <0.001 | 2.252 | 1.845~2.749 | <0.001 |

|               |        |       |             |        |
|---------------|--------|-------|-------------|--------|
| GPR160        | <0.001 | 1.593 | 1.396~1.817 | <0.001 |
| IGSF9         | <0.001 | 1.471 | 1.342~1.613 | <0.001 |
| C22orf34      | <0.001 | 1.344 | 1.179~1.531 | <0.001 |
| FTSJ2         | <0.001 | 1.369 | 1.233~1.519 | <0.001 |
| LSMEM1        | <0.001 | 1.548 | 1.370~1.749 | <0.001 |
| ITGB7         | <0.001 | 1.366 | 1.222~1.528 | <0.001 |
| DDX60         | <0.001 | 1.492 | 1.339~1.662 | <0.001 |
| SALL1         | <0.001 | 1.314 | 1.215~1.422 | <0.001 |
| ZNHIT6        | <0.001 | 1.543 | 1.363~1.748 | <0.001 |
| FSD1          | <0.001 | 0.814 | 0.766~0.865 | <0.001 |
| C1QTNF9B-AS1  | <0.001 | 1.577 | 1.371~1.813 | <0.001 |
| RP5-1071N3.1  | <0.001 | 1.856 | 1.304~2.643 | <0.001 |
| ZNF260        | <0.001 | 1.476 | 1.316~1.656 | <0.001 |
| TCTN1         | <0.001 | 1.385 | 1.262~1.519 | <0.001 |
| SKI           | <0.001 | 1.416 | 1.292~1.552 | <0.001 |
| SHC2          | <0.001 | 0.790 | 0.745~0.839 | <0.001 |
| CSNK1D        | <0.001 | 1.518 | 1.333~1.728 | <0.001 |
| HIPK1         | <0.001 | 1.449 | 1.303~1.612 | <0.001 |
| RNF157-AS1    | <0.001 | 0.761 | 0.691~0.839 | <0.001 |
| TMEM19        | <0.001 | 1.445 | 1.285~1.625 | <0.001 |
| TP53RK        | <0.001 | 1.774 | 1.497~2.102 | <0.001 |
| SYT5          | <0.001 | 0.831 | 0.788~0.876 | <0.001 |
| C1orf123      | <0.001 | 1.301 | 1.180~1.433 | <0.001 |
| GSR           | <0.001 | 1.503 | 1.303~1.735 | <0.001 |
| VAMP3         | <0.001 | 1.353 | 1.227~1.493 | <0.001 |
| TMEM218       | <0.001 | 1.416 | 1.268~1.581 | <0.001 |
| EIF2AK3       | <0.001 | 1.469 | 1.320~1.636 | <0.001 |
| NDOR1         | <0.001 | 1.842 | 1.599~2.122 | <0.001 |
| TRIM45        | <0.001 | 1.399 | 1.263~1.549 | <0.001 |
| TRMT13        | <0.001 | 1.406 | 1.278~1.546 | <0.001 |
| FLII          | <0.001 | 1.558 | 1.399~1.735 | <0.001 |
| TC2N          | <0.001 | 1.543 | 1.391~1.713 | <0.001 |
| SIGLEC16      | <0.001 | 1.928 | 1.578~2.356 | <0.001 |
| WDTC1         | <0.001 | 1.687 | 1.446~1.967 | <0.001 |
| IFT122        | <0.001 | 1.455 | 1.297~1.632 | <0.001 |
| TMEM5         | <0.001 | 1.297 | 1.187~1.416 | <0.001 |
| SF3B4         | <0.001 | 1.368 | 1.238~1.512 | <0.001 |
| RP11-809O17.1 | <0.001 | 1.585 | 1.387~1.811 | <0.001 |
| RPGR          | <0.001 | 1.410 | 1.284~1.549 | <0.001 |
| TAF2          | <0.001 | 1.461 | 1.314~1.625 | <0.001 |
| STRIP1        | <0.001 | 1.593 | 1.392~1.823 | <0.001 |
| KLF10         | <0.001 | 1.385 | 1.276~1.504 | <0.001 |
| LMO2          | <0.001 | 1.310 | 1.214~1.414 | <0.001 |
| EID3          | <0.001 | 1.681 | 1.493~1.892 | <0.001 |
| MSRB3         | <0.001 | 1.388 | 1.244~1.548 | <0.001 |
| GPX1P1        | <0.001 | 1.387 | 1.263~1.523 | <0.001 |
| ZBTB9         | <0.001 | 1.492 | 1.318~1.689 | <0.001 |
| RP4-758J18.13 | <0.001 | 1.679 | 1.465~1.923 | <0.001 |
| AC009005.2    | <0.001 | 1.323 | 1.219~1.435 | <0.001 |
| ENTPD3        | <0.001 | 0.670 | 0.589~0.763 | <0.001 |
| C8orf58       | <0.001 | 1.773 | 1.512~2.078 | <0.001 |
| SNX6          | <0.001 | 1.397 | 1.237~1.578 | <0.001 |

|               |        |       |             |        |
|---------------|--------|-------|-------------|--------|
| VGLL3         | <0.001 | 1.387 | 1.169~1.645 | <0.001 |
| TRABD2B       | <0.001 | 1.606 | 1.326~1.944 | <0.001 |
| C2orf44       | <0.001 | 1.869 | 1.571~2.223 | <0.001 |
| ALDH16A1      | <0.001 | 1.237 | 1.156~1.324 | <0.001 |
| C1orf87       | <0.001 | 1.445 | 1.282~1.629 | <0.001 |
| UBAP2L        | <0.001 | 1.479 | 1.312~1.668 | <0.001 |
| LYSMD3        | <0.001 | 1.492 | 1.329~1.674 | <0.001 |
| METTL4        | <0.001 | 1.656 | 1.440~1.903 | <0.001 |
| FEZF1-AS1     | <0.001 | 1.349 | 1.266~1.438 | <0.001 |
| CXorf21       | <0.001 | 1.585 | 1.393~1.803 | <0.001 |
| ECM1          | <0.001 | 1.289 | 1.189~1.396 | <0.001 |
| MORN1         | <0.001 | 1.319 | 1.185~1.469 | <0.001 |
| ZNF26         | <0.001 | 1.772 | 1.542~2.035 | <0.001 |
| CNOT1         | <0.001 | 1.429 | 1.236~1.651 | <0.001 |
| ZNF362        | <0.001 | 1.422 | 1.295~1.562 | <0.001 |
| PEX5L         | <0.001 | 0.793 | 0.740~0.851 | <0.001 |
| RASSF2        | <0.001 | 0.750 | 0.700~0.805 | <0.001 |
| RP11-538D16.2 | <0.001 | 3.657 | 2.610~5.123 | <0.001 |
| CTD-2162K18.5 | <0.001 | 1.516 | 1.346~1.708 | <0.001 |
| ATP11C        | <0.001 | 1.642 | 1.434~1.880 | <0.001 |
| RP11-651P23.4 | <0.001 | 2.014 | 1.590~2.553 | <0.001 |
| CTC-349C3.1   | <0.001 | 1.697 | 1.457~1.977 | <0.001 |
| BICC1         | <0.001 | 1.622 | 1.402~1.877 | <0.001 |
| RPE           | <0.001 | 1.500 | 1.309~1.718 | <0.001 |
| ITGB5         | <0.001 | 1.336 | 1.230~1.451 | <0.001 |
| MYH14         | <0.001 | 0.772 | 0.714~0.835 | <0.001 |
| MPP4          | <0.001 | 2.840 | 2.172~3.713 | <0.001 |
| C16orf54      | <0.001 | 1.434 | 1.240~1.657 | <0.001 |
| ZNF598        | <0.001 | 1.577 | 1.403~1.773 | <0.001 |
| FXD7          | <0.001 | 0.875 | 0.843~0.909 | <0.001 |
| HDC           | <0.001 | 1.327 | 1.184~1.488 | <0.001 |
| MRPS10        | <0.001 | 1.460 | 1.270~1.679 | <0.001 |
| DCAF13        | <0.001 | 1.467 | 1.321~1.629 | <0.001 |
| IER2          | <0.001 | 1.273 | 1.183~1.369 | <0.001 |
| SMARCA1       | <0.001 | 1.309 | 1.169~1.465 | <0.001 |
| SKAP2         | <0.001 | 1.439 | 1.326~1.562 | <0.001 |
| DNAJC3        | <0.001 | 1.518 | 1.334~1.727 | <0.001 |
| DNAAF3        | <0.001 | 1.364 | 1.264~1.472 | <0.001 |
| RP11-521O16.2 | <0.001 | 0.054 | 0.020~0.142 | <0.001 |
| ZNFX1         | <0.001 | 1.673 | 1.440~1.943 | <0.001 |
| PTDSS1        | <0.001 | 1.456 | 1.282~1.654 | <0.001 |
| GPRIN1        | <0.001 | 0.720 | 0.661~0.784 | <0.001 |
| KIAA0368      | <0.001 | 1.654 | 1.437~1.904 | <0.001 |
| LMAN1         | <0.001 | 1.409 | 1.287~1.543 | <0.001 |
| AC069278.4    | <0.001 | 1.619 | 1.416~1.852 | <0.001 |
| CD86          | <0.001 | 1.323 | 1.215~1.442 | <0.001 |
| AC174470.1    | <0.001 | 2.000 | 1.709~2.342 | <0.001 |
| DEGS1         | <0.001 | 1.249 | 1.127~1.384 | <0.001 |
| OR2L13        | <0.001 | 0.609 | 0.521~0.712 | <0.001 |
| TRMT12        | <0.001 | 1.927 | 1.605~2.314 | <0.001 |
| ZNF814        | <0.001 | 1.487 | 1.323~1.672 | <0.001 |
| RP11-848G14.5 | <0.001 | 1.420 | 1.251~1.611 | <0.001 |

|               |        |       |             |        |
|---------------|--------|-------|-------------|--------|
| RP11-256I23.3 | <0.001 | 2.349 | 1.913~2.884 | <0.001 |
| BHLHE40       | <0.001 | 1.289 | 1.204~1.380 | <0.001 |
| HIST2H2BF     | <0.001 | 1.106 | 1.065~1.150 | <0.001 |
| RP11-521I2.3  | <0.001 | 2.119 | 1.711~2.624 | <0.001 |
| BCL6B         | <0.001 | 1.445 | 1.316~1.587 | <0.001 |
| SLC25A25      | <0.001 | 1.612 | 1.433~1.814 | <0.001 |
| EPHB1         | <0.001 | 0.789 | 0.737~0.844 | <0.001 |
| NRXN3         | <0.001 | 0.749 | 0.693~0.810 | <0.001 |
| CTD-2006C1.6  | <0.001 | 2.727 | 2.193~3.390 | <0.001 |
| ANP32E        | <0.001 | 1.298 | 1.194~1.410 | <0.001 |
| TGIF2         | <0.001 | 1.571 | 1.409~1.751 | <0.001 |
| SIGLEC1       | <0.001 | 1.269 | 1.187~1.358 | <0.001 |
| TXNRD1        | <0.001 | 1.441 | 1.308~1.587 | <0.001 |
| SOCS2-AS1     | <0.001 | 1.475 | 1.355~1.605 | <0.001 |
| GAS1          | <0.001 | 1.323 | 1.249~1.402 | <0.001 |
| AGL           | <0.001 | 1.537 | 1.336~1.767 | <0.001 |
| FLT4          | <0.001 | 1.437 | 1.306~1.580 | <0.001 |
| CKM           | <0.001 | 1.646 | 1.358~1.994 | <0.001 |
| AC129929.5    | <0.001 | 0.372 | 0.294~0.471 | <0.001 |
| MLLT10        | <0.001 | 1.593 | 1.414~1.796 | <0.001 |
| PLXNB3        | <0.001 | 0.830 | 0.782~0.881 | <0.001 |
| HESX1         | <0.001 | 1.627 | 1.421~1.863 | <0.001 |
| HOXB-AS1      | <0.001 | 1.318 | 1.238~1.404 | <0.001 |
| SPICE1        | <0.001 | 1.577 | 1.406~1.769 | <0.001 |
| CREM          | <0.001 | 1.244 | 1.136~1.363 | <0.001 |
| LINC00662     | <0.001 | 1.404 | 1.268~1.554 | <0.001 |
| ABLIM2        | <0.001 | 0.742 | 0.683~0.807 | <0.001 |
| FXVD5         | <0.001 | 1.150 | 1.098~1.206 | <0.001 |
| LZIC          | <0.001 | 1.698 | 1.484~1.943 | <0.001 |
| AIDA          | <0.001 | 1.429 | 1.272~1.606 | <0.001 |
| MFN2          | <0.001 | 1.722 | 1.498~1.980 | <0.001 |
| AC078883.3    | <0.001 | 2.195 | 1.833~2.628 | <0.001 |
| GALNS         | <0.001 | 1.520 | 1.333~1.732 | <0.001 |
| CRYAB         | <0.001 | 0.918 | 0.887~0.951 | <0.001 |
| CD247         | <0.001 | 1.406 | 1.255~1.576 | <0.001 |
| NMRAL1        | <0.001 | 1.241 | 1.149~1.339 | <0.001 |
| ARCN1         | <0.001 | 1.593 | 1.383~1.834 | <0.001 |
| MXD3          | <0.001 | 1.300 | 1.217~1.388 | <0.001 |
| LEF1          | <0.001 | 1.438 | 1.323~1.562 | <0.001 |
| NBPF15        | <0.001 | 1.472 | 1.332~1.627 | <0.001 |
| IMPDH1        | <0.001 | 1.542 | 1.388~1.713 | <0.001 |
| CMPK1         | <0.001 | 1.447 | 1.309~1.599 | <0.001 |
| TASP1         | <0.001 | 1.617 | 1.387~1.885 | <0.001 |
| RP11-379H18.1 | <0.001 | 1.607 | 1.416~1.823 | <0.001 |
| CXCL11        | <0.001 | 1.470 | 1.338~1.615 | <0.001 |
| PRR16         | <0.001 | 1.546 | 1.379~1.733 | <0.001 |
| CCT8          | <0.001 | 1.265 | 1.157~1.383 | <0.001 |
| KIF3C         | <0.001 | 0.725 | 0.669~0.785 | <0.001 |
| SEC16B        | <0.001 | 1.599 | 1.399~1.827 | <0.001 |
| TTBK2         | <0.001 | 0.607 | 0.535~0.690 | <0.001 |
| PKD2          | <0.001 | 1.565 | 1.416~1.729 | <0.001 |
| HPS1          | <0.001 | 1.319 | 1.203~1.445 | <0.001 |



|               |        |       |             |        |
|---------------|--------|-------|-------------|--------|
| AF064860.7    | <0.001 | 1.986 | 1.567~2.516 | <0.001 |
| STAU1         | <0.001 | 1.399 | 1.264~1.549 | <0.001 |
| RP3-428L16.2  | <0.001 | 1.273 | 1.190~1.362 | <0.001 |
| STK36         | <0.001 | 1.413 | 1.295~1.542 | <0.001 |
| ZNF655        | <0.001 | 1.440 | 1.284~1.616 | <0.001 |
| FBXW9         | <0.001 | 1.397 | 1.268~1.538 | <0.001 |
| RP11-61A14.4  | <0.001 | 2.623 | 2.003~3.434 | <0.001 |
| PALD1         | <0.001 | 1.479 | 1.332~1.642 | <0.001 |
| MIA           | <0.001 | 1.192 | 1.135~1.251 | <0.001 |
| YAP1          | <0.001 | 1.326 | 1.227~1.432 | <0.001 |
| LAMA3         | <0.001 | 0.568 | 0.470~0.688 | <0.001 |
| VAMP8         | <0.001 | 1.247 | 1.174~1.324 | <0.001 |
| KCNQ1         | <0.001 | 1.522 | 1.363~1.700 | <0.001 |
| RP11-24B19.4  | <0.001 | 0.604 | 0.522~0.698 | <0.001 |
| APC2          | <0.001 | 0.742 | 0.691~0.797 | <0.001 |
| LAMC3         | <0.001 | 1.230 | 1.157~1.307 | <0.001 |
| ZNF561        | <0.001 | 1.462 | 1.319~1.620 | <0.001 |
| PMP22         | <0.001 | 1.191 | 1.105~1.283 | <0.001 |
| C12orf76      | <0.001 | 0.816 | 0.754~0.882 | <0.001 |
| ZNF878        | <0.001 | 3.376 | 2.332~4.888 | <0.001 |
| RP11-497H16.6 | <0.001 | 1.696 | 1.447~1.987 | <0.001 |
| MCFD2         | <0.001 | 1.520 | 1.347~1.716 | <0.001 |
| MKNK1         | <0.001 | 1.358 | 1.218~1.515 | <0.001 |
| CATSPERB      | <0.001 | 2.157 | 1.678~2.774 | <0.001 |
| PRKCZ         | <0.001 | 0.806 | 0.765~0.850 | <0.001 |
| EFHC1         | <0.001 | 1.388 | 1.266~1.522 | <0.001 |
| STAT6         | <0.001 | 1.336 | 1.212~1.472 | <0.001 |
| RP11-114N19.3 | <0.001 | 0.296 | 0.211~0.413 | <0.001 |
| TMX1          | <0.001 | 1.404 | 1.282~1.539 | <0.001 |
| RP11-262H14.1 | <0.001 | 1.464 | 1.332~1.609 | <0.001 |
| FRMD3         | <0.001 | 1.251 | 1.150~1.360 | <0.001 |
| CNNM2         | <0.001 | 0.542 | 0.462~0.636 | <0.001 |
| CTDSP2        | <0.001 | 1.417 | 1.316~1.526 | <0.001 |
| CRTAP         | <0.001 | 1.553 | 1.390~1.735 | <0.001 |
| CKAP2         | <0.001 | 1.382 | 1.274~1.499 | <0.001 |
| ADIPOR1       | <0.001 | 1.707 | 1.498~1.944 | <0.001 |
| C17orf72      | <0.001 | 1.311 | 1.211~1.419 | <0.001 |
| BET1          | <0.001 | 1.498 | 1.348~1.665 | <0.001 |
| RP11-686D22.3 | <0.001 | 1.957 | 1.672~2.289 | <0.001 |
| SEMA3A        | <0.001 | 1.568 | 1.433~1.715 | <0.001 |
| ANKRD13C      | <0.001 | 1.720 | 1.475~2.006 | <0.001 |
| KIAA0930      | <0.001 | 0.796 | 0.742~0.854 | <0.001 |
| IFI6          | <0.001 | 1.249 | 1.178~1.324 | <0.001 |
| RP4-758J18.2  | <0.001 | 1.681 | 1.468~1.925 | <0.001 |
| HLA-DQA2      | <0.001 | 1.379 | 1.263~1.505 | <0.001 |
| HLA-F-AS1     | <0.001 | 1.698 | 1.352~2.132 | <0.001 |
| C6orf25       | <0.001 | 1.875 | 1.462~2.405 | <0.001 |
| FAM214B       | <0.001 | 1.642 | 1.413~1.908 | <0.001 |
| CNTN4         | <0.001 | 0.629 | 0.557~0.710 | <0.001 |
| PDE6G         | <0.001 | 1.608 | 1.415~1.828 | <0.001 |
| ARHGAP30      | <0.001 | 1.456 | 1.325~1.599 | <0.001 |
| RNF26         | <0.001 | 1.319 | 1.172~1.483 | <0.001 |

|                |        |       |             |        |
|----------------|--------|-------|-------------|--------|
| TAC1           | <0.001 | 0.852 | 0.803~0.903 | <0.001 |
| RP11-660L16.2  | <0.001 | 0.828 | 0.772~0.889 | <0.001 |
| RNF19A         | <0.001 | 1.334 | 1.234~1.442 | <0.001 |
| AC093157.1     | <0.001 | 2.573 | 1.968~3.365 | <0.001 |
| PDZD8          | <0.001 | 0.639 | 0.578~0.707 | <0.001 |
| PRKDC          | <0.001 | 1.407 | 1.292~1.533 | <0.001 |
| TNIP2          | <0.001 | 1.423 | 1.281~1.581 | <0.001 |
| PTPRC          | <0.001 | 1.341 | 1.245~1.446 | <0.001 |
| AC092301.3     | <0.001 | 2.605 | 2.031~3.342 | <0.001 |
| UPF1           | <0.001 | 1.737 | 1.469~2.054 | <0.001 |
| SPATA41        | <0.001 | 0.442 | 0.344~0.568 | <0.001 |
| ATE1           | <0.001 | 0.633 | 0.558~0.717 | <0.001 |
| RELL1          | <0.001 | 1.350 | 1.249~1.460 | <0.001 |
| ANKRD27        | <0.001 | 1.683 | 1.483~1.910 | <0.001 |
| ANO1           | <0.001 | 1.501 | 1.347~1.673 | <0.001 |
| STMN4          | <0.001 | 0.840 | 0.802~0.879 | <0.001 |
| SNHG18         | <0.001 | 1.400 | 1.306~1.502 | <0.001 |
| TAF1B          | <0.001 | 1.677 | 1.475~1.906 | <0.001 |
| FHDC1          | <0.001 | 0.611 | 0.546~0.684 | <0.001 |
| CTD-2616J11.2  | <0.001 | 1.687 | 1.458~1.952 | <0.001 |
| RUVBL1         | <0.001 | 1.542 | 1.366~1.740 | <0.001 |
| LINC00994      | <0.001 | 0.011 | 0.003~0.036 | <0.001 |
| CTD-3148I10.15 | <0.001 | 1.906 | 1.601~2.268 | <0.001 |
| RP11-196G18.3  | <0.001 | 2.333 | 1.864~2.919 | <0.001 |
| HDHD3          | <0.001 | 1.233 | 1.142~1.332 | <0.001 |
| ZNF226         | <0.001 | 1.335 | 1.202~1.483 | <0.001 |
| TP53I11        | <0.001 | 1.412 | 1.283~1.554 | <0.001 |
| RCOR2          | <0.001 | 0.810 | 0.765~0.857 | <0.001 |
| CTA-384D8.35   | <0.001 | 1.755 | 1.473~2.090 | <0.001 |
| LPXN           | <0.001 | 1.542 | 1.372~1.733 | <0.001 |
| IGFLR1         | <0.001 | 1.266 | 1.181~1.357 | <0.001 |
| RAB43          | <0.001 | 1.551 | 1.350~1.781 | <0.001 |
| ZNF225         | <0.001 | 1.550 | 1.358~1.769 | <0.001 |
| RP11-565P22.6  | <0.001 | 1.452 | 1.329~1.585 | <0.001 |
| MAGEH1         | <0.001 | 0.816 | 0.770~0.865 | <0.001 |
| IDH1           | <0.001 | 1.439 | 1.307~1.584 | <0.001 |
| IGHM           | <0.001 | 1.147 | 1.096~1.201 | <0.001 |
| GAB3           | <0.001 | 1.579 | 1.384~1.802 | <0.001 |
| GBF1           | <0.001 | 0.733 | 0.648~0.829 | <0.001 |
| RP11-44N21.1   | <0.001 | 0.562 | 0.479~0.658 | <0.001 |
| ZC3HC1         | <0.001 | 1.856 | 1.569~2.194 | <0.001 |
| DENND2A        | <0.001 | 1.483 | 1.336~1.647 | <0.001 |
| VRK3           | <0.001 | 1.605 | 1.387~1.858 | <0.001 |
| PGBD5          | <0.001 | 0.767 | 0.707~0.832 | <0.001 |
| LILRB4         | <0.001 | 1.267 | 1.184~1.357 | <0.001 |
| RP11-222K16.2  | <0.001 | 1.610 | 1.342~1.931 | <0.001 |
| RP11-705C15.3  | <0.001 | 2.253 | 1.755~2.891 | <0.001 |
| ZNF235         | <0.001 | 1.871 | 1.614~2.170 | <0.001 |
| FAM201A        | <0.001 | 0.704 | 0.633~0.782 | <0.001 |
| ALG12          | <0.001 | 1.627 | 1.445~1.833 | <0.001 |
| ACSS3          | <0.001 | 1.418 | 1.316~1.527 | <0.001 |
| CCR2           | <0.001 | 1.579 | 1.340~1.861 | <0.001 |

|                |        |       |             |        |
|----------------|--------|-------|-------------|--------|
| AK4            | <0.001 | 1.391 | 1.278~1.514 | <0.001 |
| FEZ1           | <0.001 | 0.828 | 0.778~0.881 | <0.001 |
| RP11-834C11.11 | <0.001 | 1.923 | 1.596~2.318 | <0.001 |
| GRIP2          | <0.001 | 0.718 | 0.636~0.809 | <0.001 |
| CCT7P2         | <0.001 | 0.196 | 0.137~0.279 | <0.001 |
| OXA1L          | <0.001 | 1.506 | 1.328~1.709 | <0.001 |
| SMG9           | <0.001 | 1.367 | 1.242~1.504 | <0.001 |
| TRIAP1         | <0.001 | 1.390 | 1.251~1.544 | <0.001 |
| KCNA1          | <0.001 | 0.778 | 0.719~0.841 | <0.001 |
| CTD-2050B12.2  | <0.001 | 0.208 | 0.117~0.370 | <0.001 |
| ATAT1          | <0.001 | 0.851 | 0.797~0.909 | <0.001 |
| ACN9           | <0.001 | 1.310 | 1.202~1.428 | <0.001 |
| C6orf118       | <0.001 | 1.376 | 1.280~1.479 | <0.001 |
| BRD4           | <0.001 | 1.518 | 1.356~1.698 | <0.001 |
| SLAMF1         | <0.001 | 1.555 | 1.233~1.961 | <0.001 |
| AC004797.1     | <0.001 | 1.480 | 1.332~1.645 | <0.001 |
| ZNF83          | <0.001 | 1.380 | 1.247~1.526 | <0.001 |
| SLAIN1         | <0.001 | 0.778 | 0.721~0.838 | <0.001 |
| SLC17A6        | <0.001 | 0.713 | 0.621~0.818 | <0.001 |
| HMGXB3         | <0.001 | 1.645 | 1.479~1.830 | <0.001 |
| CDH5           | <0.001 | 1.405 | 1.285~1.537 | <0.001 |
| MIR497HG       | <0.001 | 0.712 | 0.663~0.765 | <0.001 |
| PEPD           | <0.001 | 1.389 | 1.252~1.541 | <0.001 |
| FRMD4B         | <0.001 | 1.340 | 1.229~1.462 | <0.001 |
| A1BG-AS1       | <0.001 | 1.542 | 1.362~1.745 | <0.001 |
| ATAD3A         | <0.001 | 1.456 | 1.321~1.606 | <0.001 |
| GLMN           | <0.001 | 1.458 | 1.304~1.630 | <0.001 |
| EGR2           | <0.001 | 1.218 | 1.153~1.287 | <0.001 |
| PODXL2         | <0.001 | 0.767 | 0.723~0.813 | <0.001 |
| ZNF880         | <0.001 | 1.618 | 1.410~1.857 | <0.001 |
| ZNF527         | <0.001 | 1.904 | 1.607~2.255 | <0.001 |
| TTI1           | <0.001 | 1.561 | 1.391~1.752 | <0.001 |
| FKBP14         | <0.001 | 1.457 | 1.303~1.628 | <0.001 |
| AC017116.11    | <0.001 | 1.331 | 1.223~1.449 | <0.001 |
| PDIK1L         | <0.001 | 1.646 | 1.423~1.903 | <0.001 |
| ZNF146         | <0.001 | 1.433 | 1.306~1.572 | <0.001 |
| ETHE1          | <0.001 | 1.360 | 1.239~1.492 | <0.001 |
| ZNF497         | <0.001 | 1.766 | 1.514~2.060 | <0.001 |
| USO1           | <0.001 | 1.442 | 1.296~1.605 | <0.001 |
| BZW2           | <0.001 | 1.427 | 1.288~1.581 | <0.001 |
| SV2B           | <0.001 | 0.785 | 0.734~0.839 | <0.001 |
| SFN            | <0.001 | 1.208 | 1.120~1.303 | <0.001 |
| SBF2-AS1       | <0.001 | 1.576 | 1.396~1.779 | <0.001 |
| RRAS           | <0.001 | 1.283 | 1.194~1.379 | <0.001 |
| HMX1           | <0.001 | 0.823 | 0.786~0.862 | <0.001 |
| MS4A4A         | <0.001 | 1.300 | 1.224~1.382 | <0.001 |
| LINC00324      | <0.001 | 2.237 | 1.785~2.803 | <0.001 |
| UBIAD1         | <0.001 | 1.634 | 1.433~1.863 | <0.001 |
| MYB            | <0.001 | 1.510 | 1.359~1.678 | <0.001 |
| F2R            | <0.001 | 1.349 | 1.255~1.452 | <0.001 |
| RP5-1074L1.4   | <0.001 | 1.631 | 1.453~1.829 | <0.001 |
| RP11-290F20.3  | <0.001 | 1.302 | 1.222~1.388 | <0.001 |

|               |        |       |             |        |
|---------------|--------|-------|-------------|--------|
| IGLL5         | <0.001 | 1.193 | 1.119~1.272 | <0.001 |
| PGBD1         | <0.001 | 1.542 | 1.326~1.793 | <0.001 |
| SSC5D         | <0.001 | 1.491 | 1.351~1.645 | <0.001 |
| RFESD         | <0.001 | 1.994 | 1.703~2.335 | <0.001 |
| CTA-445C9.14  | <0.001 | 0.735 | 0.659~0.819 | <0.001 |
| SPATA33       | <0.001 | 1.438 | 1.287~1.607 | <0.001 |
| HMG4          | <0.001 | 1.388 | 1.282~1.502 | <0.001 |
| CYB5R1        | <0.001 | 1.414 | 1.264~1.583 | <0.001 |
| EVA1C         | <0.001 | 1.215 | 1.146~1.289 | <0.001 |
| GABBR2        | <0.001 | 0.820 | 0.774~0.868 | <0.001 |
| TAB1          | <0.001 | 0.684 | 0.617~0.760 | <0.001 |
| RP11-148K1.12 | <0.001 | 1.595 | 1.416~1.798 | <0.001 |
| RP13-766D20.2 | <0.001 | 2.354 | 1.833~3.023 | <0.001 |
| AC083799.1    | <0.001 | 1.645 | 1.431~1.892 | <0.001 |
| SLC26A1       | <0.001 | 0.634 | 0.556~0.723 | <0.001 |
| GPC4          | <0.001 | 1.456 | 1.334~1.589 | <0.001 |
| E2F3          | <0.001 | 1.611 | 1.451~1.788 | <0.001 |
| KIAA0513      | <0.001 | 0.683 | 0.620~0.753 | <0.001 |
| AC005789.11   | <0.001 | 1.390 | 1.285~1.504 | <0.001 |
| SCYL2         | <0.001 | 1.497 | 1.343~1.669 | <0.001 |
| CTD-2201E18.3 | <0.001 | 1.722 | 1.486~1.996 | <0.001 |
| DOCK11        | <0.001 | 1.892 | 1.652~2.167 | <0.001 |
| PLEKHG6       | <0.001 | 1.421 | 1.160~1.740 | <0.001 |
| AHCY          | <0.001 | 1.485 | 1.308~1.687 | <0.001 |
| TNIP1         | <0.001 | 1.496 | 1.333~1.680 | <0.001 |
| DYNLL1-AS1    | <0.001 | 1.878 | 1.619~2.179 | <0.001 |
| HDAC3         | <0.001 | 1.630 | 1.427~1.862 | <0.001 |
| CHRNA2        | <0.001 | 0.612 | 0.516~0.725 | <0.001 |
| ZNF79         | <0.001 | 2.182 | 1.780~2.674 | <0.001 |
| BPI           | <0.001 | 0.667 | 0.589~0.754 | <0.001 |
| TM9SF4        | <0.001 | 1.406 | 1.269~1.559 | <0.001 |
| NLRC4         | <0.001 | 1.674 | 1.444~1.940 | <0.001 |
| RP11-523H20.3 | <0.001 | 1.738 | 1.479~2.044 | <0.001 |
| CHPF          | <0.001 | 1.409 | 1.296~1.531 | <0.001 |
| GXYLT1        | <0.001 | 1.805 | 1.556~2.093 | <0.001 |
| UBA1          | <0.001 | 1.472 | 1.281~1.692 | <0.001 |
| ZNF507        | <0.001 | 1.535 | 1.340~1.757 | <0.001 |
| GTPBP1        | <0.001 | 0.656 | 0.567~0.759 | <0.001 |
| DAXX          | <0.001 | 1.985 | 1.717~2.296 | <0.001 |
| GPSM3         | <0.001 | 1.280 | 1.188~1.380 | <0.001 |
| F2RL3         | <0.001 | 1.467 | 1.268~1.698 | <0.001 |
| TBK1          | <0.001 | 1.376 | 1.250~1.514 | <0.001 |
| HS6ST1        | <0.001 | 1.649 | 1.460~1.862 | <0.001 |
| GTF2E1        | <0.001 | 1.776 | 1.528~2.064 | <0.001 |
| RP11-588G21.2 | <0.001 | 0.355 | 0.261~0.482 | <0.001 |
| SLC26A7       | <0.001 | 1.692 | 1.491~1.920 | <0.001 |
| RP5-1042I8.7  | <0.001 | 1.589 | 1.382~1.826 | <0.001 |
| ZBED6CL       | <0.001 | 1.466 | 1.305~1.646 | <0.001 |
| BEST4         | <0.001 | 1.417 | 1.290~1.557 | <0.001 |
| TMEM44        | <0.001 | 1.598 | 1.412~1.809 | <0.001 |
| NBPF16        | <0.001 | 1.680 | 1.461~1.931 | <0.001 |
| POPDC2        | <0.001 | 1.493 | 1.322~1.687 | <0.001 |

|               |        |       |             |        |
|---------------|--------|-------|-------------|--------|
| ZNF534        | <0.001 | 0.442 | 0.360~0.542 | <0.001 |
| RAG1          | <0.001 | 1.929 | 1.561~2.384 | <0.001 |
| MIA3          | <0.001 | 1.450 | 1.295~1.623 | <0.001 |
| TRIM6         | <0.001 | 1.816 | 1.568~2.103 | <0.001 |
| ZNF71         | <0.001 | 1.816 | 1.569~2.102 | <0.001 |
| C1orf86       | <0.001 | 1.154 | 1.088~1.223 | <0.001 |
| G3BP1         | <0.001 | 1.486 | 1.343~1.645 | <0.001 |
| AC108676.1    | <0.001 | 1.816 | 1.275~2.588 | <0.001 |
| HBEGF         | <0.001 | 1.379 | 1.261~1.507 | <0.001 |
| TLDC1         | <0.001 | 1.827 | 1.510~2.210 | <0.001 |
| LCN15         | <0.001 | 0.702 | 0.612~0.807 | <0.001 |
| TRA2A         | <0.001 | 1.438 | 1.315~1.572 | <0.001 |
| DHRS12        | <0.001 | 0.756 | 0.695~0.821 | <0.001 |
| AC018766.4    | <0.001 | 1.478 | 1.324~1.650 | <0.001 |
| RP11-96K19.2  | <0.001 | 4.970 | 3.247~7.609 | <0.001 |
| RAD1          | <0.001 | 1.519 | 1.334~1.729 | <0.001 |
| VEPH1         | <0.001 | 0.740 | 0.686~0.798 | <0.001 |
| TRIM5         | <0.001 | 1.629 | 1.459~1.819 | <0.001 |
| TSSK1A        | <0.001 | 0.447 | 0.351~0.569 | <0.001 |
| RP11-251G23.5 | <0.001 | 2.605 | 2.026~3.350 | <0.001 |
| IGLV1-51      | <0.001 | 1.221 | 1.152~1.293 | <0.001 |
| CYP27A1       | <0.001 | 1.237 | 1.155~1.325 | <0.001 |
| CACNA2D4      | <0.001 | 1.405 | 1.295~1.524 | <0.001 |
| RALB          | <0.001 | 1.296 | 1.174~1.430 | <0.001 |
| CTD-2587H19.1 | <0.001 | 1.741 | 1.496~2.025 | <0.001 |
| CLEC11A       | <0.001 | 1.270 | 1.183~1.364 | <0.001 |
| FOS           | <0.001 | 1.234 | 1.174~1.297 | <0.001 |
| RP11-203J24.8 | <0.001 | 1.435 | 1.287~1.599 | <0.001 |
| SH3BP2        | <0.001 | 1.534 | 1.376~1.710 | <0.001 |
| ACAT2         | <0.001 | 0.751 | 0.692~0.816 | <0.001 |
| CPLX3         | <0.001 | 0.712 | 0.649~0.781 | <0.001 |
| IP6K2         | <0.001 | 1.437 | 1.300~1.589 | <0.001 |
| SLC35A4       | <0.001 | 1.586 | 1.381~1.820 | <0.001 |
| CLDN4         | <0.001 | 1.555 | 1.365~1.771 | <0.001 |
| LRRFIP1       | <0.001 | 1.423 | 1.280~1.583 | <0.001 |
| NGFRAP1       | <0.001 | 0.880 | 0.825~0.938 | <0.001 |
| RP11-65L3.2   | <0.001 | 2.816 | 2.099~3.777 | <0.001 |
| DKC1          | <0.001 | 1.708 | 1.527~1.910 | <0.001 |
| FBXO32        | <0.001 | 1.252 | 1.172~1.337 | <0.001 |
| TBX15         | <0.001 | 1.609 | 1.452~1.782 | <0.001 |
| EMR4P         | <0.001 | 1.800 | 1.537~2.109 | <0.001 |
| APH1A         | <0.001 | 1.586 | 1.390~1.811 | <0.001 |
| KIF6          | <0.001 | 0.685 | 0.629~0.746 | <0.001 |
| C17orf58      | <0.001 | 1.370 | 1.230~1.526 | <0.001 |
| DDI2          | <0.001 | 1.885 | 1.599~2.223 | <0.001 |
| UGGT1         | <0.001 | 1.677 | 1.479~1.902 | <0.001 |
| SMIM12        | <0.001 | 1.382 | 1.246~1.532 | <0.001 |
| CDK20         | <0.001 | 1.737 | 1.498~2.015 | <0.001 |
| TRIM36        | <0.001 | 1.322 | 1.222~1.430 | <0.001 |
| TPM3P9        | <0.001 | 1.751 | 1.524~2.011 | <0.001 |
| AC104655.3    | <0.001 | 0.660 | 0.586~0.744 | <0.001 |
| AC068831.10   | <0.001 | 0.385 | 0.286~0.519 | <0.001 |

|               |        |       |             |        |
|---------------|--------|-------|-------------|--------|
| MRPL13        | <0.001 | 1.264 | 1.151~1.387 | <0.001 |
| C1orf74       | <0.001 | 1.982 | 1.625~2.418 | <0.001 |
| TTC30B        | <0.001 | 1.836 | 1.550~2.174 | <0.001 |
| FCGRT         | <0.001 | 1.289 | 1.198~1.387 | <0.001 |
| KRBOX4        | <0.001 | 1.562 | 1.365~1.786 | <0.001 |
| CPVL          | <0.001 | 1.273 | 1.196~1.355 | <0.001 |
| AD000671.6    | <0.001 | 2.480 | 1.992~3.088 | <0.001 |
| FAM183A       | <0.001 | 1.223 | 1.169~1.280 | <0.001 |
| CHD5          | <0.001 | 0.789 | 0.741~0.840 | <0.001 |
| MASTL         | <0.001 | 1.814 | 1.599~2.059 | <0.001 |
| RP4-569M23.2  | <0.001 | 1.825 | 1.484~2.245 | <0.001 |
| KLHL21        | <0.001 | 1.652 | 1.483~1.839 | <0.001 |
| KPNA4         | <0.001 | 1.505 | 1.307~1.732 | <0.001 |
| SPARCL1       | <0.001 | 0.846 | 0.806~0.887 | <0.001 |
| FKRP          | <0.001 | 1.728 | 1.538~1.941 | <0.001 |
| LIMS1         | <0.001 | 1.479 | 1.364~1.603 | <0.001 |
| MAPK12        | <0.001 | 0.744 | 0.686~0.806 | <0.001 |
| CLDN9         | <0.001 | 0.601 | 0.518~0.698 | <0.001 |
| TAF6          | <0.001 | 1.585 | 1.388~1.811 | <0.001 |
| PNP           | <0.001 | 1.401 | 1.273~1.543 | <0.001 |
| AMIGO2        | <0.001 | 1.436 | 1.309~1.576 | <0.001 |
| CNTNAP5       | <0.001 | 0.572 | 0.492~0.664 | <0.001 |
| PLA2G12AP1    | <0.001 | 2.901 | 2.142~3.931 | <0.001 |
| SPATA18       | <0.001 | 1.301 | 1.194~1.418 | <0.001 |
| SMDT1         | <0.001 | 0.865 | 0.818~0.914 | <0.001 |
| TMEM121       | <0.001 | 0.743 | 0.692~0.798 | <0.001 |
| SLC33A1       | <0.001 | 1.629 | 1.445~1.836 | <0.001 |
| TMPO          | <0.001 | 1.537 | 1.401~1.688 | <0.001 |
| YBX1P1        | <0.001 | 1.503 | 1.338~1.687 | <0.001 |
| RP11-454P7.3  | <0.001 | 0.640 | 0.560~0.731 | <0.001 |
| MICALL2       | <0.001 | 1.206 | 1.139~1.276 | <0.001 |
| GOLGA3        | <0.001 | 2.077 | 1.722~2.506 | <0.001 |
| B9D2          | <0.001 | 1.509 | 1.367~1.666 | <0.001 |
| SLC35A3       | <0.001 | 1.521 | 1.350~1.714 | <0.001 |
| MMS22L        | <0.001 | 1.846 | 1.610~2.116 | <0.001 |
| DNAJC16       | <0.001 | 1.916 | 1.637~2.241 | <0.001 |
| C3orf52       | <0.001 | 1.743 | 1.512~2.011 | <0.001 |
| GATAD1        | <0.001 | 1.460 | 1.331~1.601 | <0.001 |
| LEKR1         | <0.001 | 1.625 | 1.367~1.931 | <0.001 |
| LRRC39        | <0.001 | 1.599 | 1.428~1.791 | <0.001 |
| ZNF259        | <0.001 | 1.538 | 1.342~1.762 | <0.001 |
| HIST2H4B      | <0.001 | 1.126 | 1.082~1.173 | <0.001 |
| DSCAM         | <0.001 | 0.736 | 0.678~0.799 | <0.001 |
| RP11-6O2.4    | <0.001 | 1.934 | 1.557~2.402 | <0.001 |
| HS3ST1        | <0.001 | 1.426 | 1.310~1.552 | <0.001 |
| CACNB4        | <0.001 | 0.642 | 0.575~0.716 | <0.001 |
| MXRA5P1       | <0.001 | 3.007 | 2.143~4.219 | <0.001 |
| RP4-669P10.16 | <0.001 | 0.412 | 0.324~0.525 | <0.001 |
| HM13          | <0.001 | 1.227 | 1.146~1.315 | <0.001 |
| P4HA1         | <0.001 | 1.444 | 1.313~1.588 | <0.001 |
| PANK2         | <0.001 | 1.952 | 1.623~2.347 | <0.001 |
| ZFYVE20       | <0.001 | 0.594 | 0.524~0.672 | <0.001 |

|                |        |       |             |        |
|----------------|--------|-------|-------------|--------|
| MOV10          | <0.001 | 1.302 | 1.209~1.403 | <0.001 |
| HAUS8          | <0.001 | 1.425 | 1.305~1.556 | <0.001 |
| RP11-10C24.3   | <0.001 | 2.428 | 2.005~2.940 | <0.001 |
| PSEN2          | <0.001 | 1.752 | 1.501~2.045 | <0.001 |
| PTGER4         | <0.001 | 1.424 | 1.297~1.562 | <0.001 |
| AC112229.7     | <0.001 | 0.784 | 0.726~0.846 | <0.001 |
| CD96           | <0.001 | 1.389 | 1.191~1.620 | <0.001 |
| RP11-5C23.1    | <0.001 | 1.460 | 1.326~1.608 | <0.001 |
| C17orf102      | <0.001 | 0.260 | 0.182~0.373 | <0.001 |
| SCD5           | <0.001 | 0.751 | 0.704~0.801 | <0.001 |
| RP11-429B14.4  | <0.001 | 0.822 | 0.772~0.875 | <0.001 |
| CYP2A6         | <0.001 | 0.304 | 0.215~0.430 | <0.001 |
| SYTL3          | <0.001 | 1.534 | 1.374~1.711 | <0.001 |
| RTKN           | <0.001 | 0.748 | 0.684~0.818 | <0.001 |
| OSTF1          | <0.001 | 1.313 | 1.209~1.424 | <0.001 |
| WDR5           | <0.001 | 1.680 | 1.457~1.936 | <0.001 |
| RP11-737O24.5  | <0.001 | 1.921 | 1.552~2.377 | <0.001 |
| SYNM           | <0.001 | 1.288 | 1.193~1.389 | <0.001 |
| PDXP           | <0.001 | 0.773 | 0.725~0.825 | <0.001 |
| LAT2           | <0.001 | 1.361 | 1.248~1.483 | <0.001 |
| PRKCB          | <0.001 | 0.751 | 0.703~0.803 | <0.001 |
| C11orf21       | <0.001 | 1.713 | 1.475~1.989 | <0.001 |
| BLOC1S5        | <0.001 | 1.782 | 1.521~2.087 | <0.001 |
| ROR2           | <0.001 | 1.345 | 1.204~1.504 | <0.001 |
| SIX6           | <0.001 | 1.515 | 1.379~1.666 | <0.001 |
| CTD-2527I21.14 | <0.001 | 2.238 | 1.809~2.770 | <0.001 |
| PLK1S1         | <0.001 | 0.807 | 0.757~0.860 | <0.001 |
| SHISA5         | <0.001 | 1.396 | 1.271~1.534 | <0.001 |
| RRM1           | <0.001 | 1.457 | 1.322~1.605 | <0.001 |
| RP11-469H8.6   | <0.001 | 1.817 | 1.547~2.133 | <0.001 |
| CROCCP2        | <0.001 | 1.594 | 1.425~1.782 | <0.001 |
| RP11-473M20.14 | <0.001 | 0.741 | 0.673~0.816 | <0.001 |
| NDNL2          | <0.001 | 1.492 | 1.331~1.672 | <0.001 |
| TIAM1          | <0.001 | 0.656 | 0.584~0.738 | <0.001 |
| SHISA9         | <0.001 | 0.721 | 0.665~0.782 | <0.001 |
| RLF            | <0.001 | 1.779 | 1.544~2.050 | <0.001 |
| RP4-740C4.6    | <0.001 | 1.689 | 1.496~1.906 | <0.001 |
| OXSR1          | <0.001 | 1.967 | 1.711~2.262 | <0.001 |
| HCAR2          | <0.001 | 1.274 | 1.131~1.434 | <0.001 |
| EVI2B          | <0.001 | 1.363 | 1.256~1.480 | <0.001 |
| TTC28-AS1      | <0.001 | 0.715 | 0.642~0.795 | <0.001 |
| SMC6           | <0.001 | 1.562 | 1.415~1.725 | <0.001 |
| ARHGEF1        | <0.001 | 1.328 | 1.229~1.435 | <0.001 |
| DMTF1          | <0.001 | 1.420 | 1.289~1.565 | <0.001 |
| RNF208         | <0.001 | 0.837 | 0.797~0.879 | <0.001 |
| AC093818.1     | <0.001 | 1.932 | 1.628~2.293 | <0.001 |
| TGOLN2         | <0.001 | 1.497 | 1.327~1.689 | <0.001 |
| RP11-66N24.4   | <0.001 | 0.718 | 0.652~0.791 | <0.001 |
| C18orf54       | <0.001 | 1.894 | 1.624~2.208 | <0.001 |
| ARMC10         | <0.001 | 1.498 | 1.336~1.679 | <0.001 |
| RP1-168L15.5   | <0.001 | 0.360 | 0.280~0.462 | <0.001 |
| PDZK1IP1       | <0.001 | 1.396 | 1.295~1.504 | <0.001 |

|              |        |       |             |        |
|--------------|--------|-------|-------------|--------|
| MVK          | <0.001 | 0.716 | 0.649~0.790 | <0.001 |
| PTPRR        | <0.001 | 0.711 | 0.639~0.792 | <0.001 |
| SNHG12       | <0.001 | 1.359 | 1.248~1.479 | <0.001 |
| DLG2         | <0.001 | 0.742 | 0.684~0.804 | <0.001 |
| SLC25A30     | <0.001 | 1.674 | 1.442~1.943 | <0.001 |
| MOAP1        | <0.001 | 0.713 | 0.655~0.777 | <0.001 |
| URI1         | <0.001 | 1.562 | 1.379~1.770 | <0.001 |
| CAPN15       | <0.001 | 1.579 | 1.420~1.756 | <0.001 |
| XPR1         | <0.001 | 1.433 | 1.287~1.596 | <0.001 |
| CXorf40A     | <0.001 | 1.341 | 1.210~1.485 | <0.001 |
| RP11-468E2.4 | <0.001 | 2.346 | 1.877~2.933 | <0.001 |
| SCNN1B       | <0.001 | 1.329 | 1.213~1.455 | <0.001 |
| HAPLN3       | <0.001 | 1.318 | 1.209~1.437 | <0.001 |
| STK35        | <0.001 | 1.990 | 1.692~2.339 | <0.001 |
| IGLC1        | <0.001 | 1.120 | 1.085~1.156 | <0.001 |
| TBC1D22B     | <0.001 | 1.772 | 1.478~2.124 | <0.001 |
| TLR3         | <0.001 | 1.478 | 1.305~1.674 | <0.001 |
| CD226        | <0.001 | 1.749 | 1.512~2.022 | <0.001 |
| NEDD9        | <0.001 | 1.507 | 1.376~1.650 | <0.001 |
| DHRS2        | <0.001 | 0.760 | 0.695~0.831 | <0.001 |
| ZNF569       | <0.001 | 1.639 | 1.415~1.898 | <0.001 |
| PEBP1        | <0.001 | 0.846 | 0.792~0.903 | <0.001 |
| CTC-471F3.6  | <0.001 | 1.546 | 1.368~1.746 | <0.001 |
| ZNF773       | <0.001 | 1.555 | 1.389~1.742 | <0.001 |
| ANKRD29      | <0.001 | 0.662 | 0.593~0.738 | <0.001 |
| FGFBP3       | <0.001 | 0.717 | 0.664~0.775 | <0.001 |
| C4orf47      | <0.001 | 1.439 | 1.334~1.551 | <0.001 |
| BTN3A1       | <0.001 | 1.411 | 1.285~1.549 | <0.001 |
| RPP40        | <0.001 | 1.572 | 1.389~1.778 | <0.001 |
| EXOC3L1      | <0.001 | 1.304 | 1.208~1.407 | <0.001 |
| MYZAP        | <0.001 | 1.413 | 1.290~1.548 | <0.001 |
| C12orf55     | <0.001 | 1.727 | 1.507~1.979 | <0.001 |
| IGHA2        | <0.001 | 1.158 | 1.107~1.212 | <0.001 |
| MAP3K1       | <0.001 | 1.635 | 1.480~1.805 | <0.001 |
| HIAT1        | <0.001 | 1.419 | 1.271~1.584 | <0.001 |
| POLR3H       | <0.001 | 0.697 | 0.630~0.771 | <0.001 |
| WWOX         | <0.001 | 0.675 | 0.606~0.751 | <0.001 |
| ZSWIM4       | <0.001 | 1.453 | 1.315~1.607 | <0.001 |
| SIRPG        | <0.001 | 1.497 | 1.255~1.786 | <0.001 |
| HSD17B11     | <0.001 | 1.325 | 1.199~1.465 | <0.001 |
| DYX1C1       | <0.001 | 1.570 | 1.397~1.765 | <0.001 |
| CYB5D1       | <0.001 | 1.687 | 1.470~1.935 | <0.001 |
| PIGV         | <0.001 | 1.593 | 1.352~1.877 | <0.001 |
| COL11A1      | <0.001 | 1.274 | 1.203~1.350 | <0.001 |
| VSTM2L       | <0.001 | 0.814 | 0.773~0.858 | <0.001 |
| CEP85        | <0.001 | 1.574 | 1.404~1.765 | <0.001 |
| XRCC6BP1     | <0.001 | 1.369 | 1.276~1.468 | <0.001 |
| LYPD6        | <0.001 | 1.528 | 1.370~1.704 | <0.001 |
| RASSF4       | <0.001 | 0.804 | 0.747~0.866 | <0.001 |
| PLEKHA8      | <0.001 | 1.937 | 1.654~2.270 | <0.001 |
| USP54        | <0.001 | 0.769 | 0.715~0.826 | <0.001 |
| HMGA1        | <0.001 | 1.433 | 1.310~1.568 | <0.001 |



|                  |        |       |             |        |
|------------------|--------|-------|-------------|--------|
| NDST3            | <0.001 | 0.540 | 0.449~0.650 | <0.001 |
| CTD-2521M24.6    | <0.001 | 2.008 | 1.725~2.337 | <0.001 |
| C1orf63          | <0.001 | 1.517 | 1.380~1.667 | <0.001 |
| WDR4             | <0.001 | 1.599 | 1.416~1.806 | <0.001 |
| NEK8             | <0.001 | 1.852 | 1.584~2.165 | <0.001 |
| VDAC2            | <0.001 | 0.870 | 0.814~0.930 | <0.001 |
| CYB561D1         | <0.001 | 1.862 | 1.567~2.212 | <0.001 |
| SRRM5            | <0.001 | 1.870 | 1.562~2.240 | <0.001 |
| ORAI1            | <0.001 | 1.491 | 1.339~1.660 | <0.001 |
| RP11-817O13.8    | <0.001 | 2.038 | 1.658~2.505 | <0.001 |
| CITED2           | <0.001 | 1.390 | 1.282~1.508 | <0.001 |
| OSBPL3           | <0.001 | 1.432 | 1.324~1.549 | <0.001 |
| RP11-423C15.3    | <0.001 | 1.797 | 1.317~2.453 | <0.001 |
| NCF1C            | <0.001 | 1.379 | 1.274~1.494 | <0.001 |
| PCK2             | <0.001 | 1.404 | 1.265~1.558 | <0.001 |
| SPAG5            | <0.001 | 1.367 | 1.264~1.478 | <0.001 |
| HLCS             | <0.001 | 1.814 | 1.585~2.076 | <0.001 |
| PIGK             | <0.001 | 1.529 | 1.366~1.712 | <0.001 |
| BLCAP            | <0.001 | 0.801 | 0.743~0.864 | <0.001 |
| PXDC1            | <0.001 | 1.432 | 1.301~1.577 | <0.001 |
| SLC25A39         | <0.001 | 1.530 | 1.385~1.690 | <0.001 |
| SLFNL1           | <0.001 | 1.522 | 1.305~1.776 | <0.001 |
| MMRN1            | <0.001 | 1.723 | 1.520~1.952 | <0.001 |
| EOMES            | <0.001 | 1.523 | 1.268~1.830 | <0.001 |
| RPGRIP1L         | <0.001 | 1.738 | 1.488~2.031 | <0.001 |
| EFTUD2           | <0.001 | 1.880 | 1.615~2.188 | <0.001 |
| RP11-838N2.5     | <0.001 | 1.758 | 1.492~2.072 | <0.001 |
| SLAMF9           | <0.001 | 1.359 | 1.246~1.482 | <0.001 |
| XXyac-YX65C7_A.2 | <0.001 | 1.896 | 1.602~2.244 | <0.001 |
| TBX2             | <0.001 | 1.203 | 1.124~1.288 | <0.001 |
| ARHGAP29         | <0.001 | 1.496 | 1.361~1.644 | <0.001 |
| MPV17            | <0.001 | 1.461 | 1.313~1.626 | <0.001 |
| TMEM246          | <0.001 | 0.709 | 0.655~0.767 | <0.001 |
| ASB9             | <0.001 | 2.075 | 1.746~2.464 | <0.001 |
| UACA             | <0.001 | 1.336 | 1.232~1.449 | <0.001 |
| TOP1             | <0.001 | 1.369 | 1.253~1.495 | <0.001 |
| CPD              | <0.001 | 1.512 | 1.377~1.661 | <0.001 |
| ATP1B3           | <0.001 | 1.314 | 1.206~1.433 | <0.001 |
| RP11-873E20.1    | <0.001 | 3.755 | 2.789~5.056 | <0.001 |
| IL12RB1          | <0.001 | 1.573 | 1.355~1.826 | <0.001 |
| H2AFY2           | <0.001 | 0.786 | 0.736~0.840 | <0.001 |
| C2orf48          | <0.001 | 1.987 | 1.710~2.308 | <0.001 |
| POP1             | <0.001 | 2.052 | 1.718~2.451 | <0.001 |
| IL10             | <0.001 | 1.534 | 1.371~1.716 | <0.001 |
| TONSL            | <0.001 | 1.559 | 1.408~1.726 | <0.001 |
| BBS5             | <0.001 | 1.400 | 1.236~1.586 | <0.001 |
| VGLL4            | <0.001 | 1.794 | 1.583~2.034 | <0.001 |
| MYSM1            | <0.001 | 1.414 | 1.280~1.562 | <0.001 |
| PDGFB            | <0.001 | 1.419 | 1.290~1.561 | <0.001 |
| MGAT3            | <0.001 | 0.703 | 0.645~0.767 | <0.001 |
| ELK4             | <0.001 | 1.652 | 1.463~1.865 | <0.001 |
| CECR1            | <0.001 | 1.383 | 1.271~1.505 | <0.001 |

|                |        |       |             |        |
|----------------|--------|-------|-------------|--------|
| CBFB           | <0.001 | 1.537 | 1.387~1.703 | <0.001 |
| ARHGAP36       | <0.001 | 0.777 | 0.717~0.843 | <0.001 |
| UPRT           | <0.001 | 1.783 | 1.561~2.036 | <0.001 |
| BAZ1A          | <0.001 | 1.548 | 1.403~1.709 | <0.001 |
| RP11-27K13.3   | <0.001 | 2.398 | 1.765~3.259 | <0.001 |
| RP11-182J1.16  | <0.001 | 0.508 | 0.417~0.619 | <0.001 |
| CTB-13F3.1     | <0.001 | 1.720 | 1.511~1.958 | <0.001 |
| NCAM1          | <0.001 | 0.735 | 0.684~0.790 | <0.001 |
| CASC10         | <0.001 | 1.446 | 1.289~1.622 | <0.001 |
| ZNF324         | <0.001 | 1.934 | 1.658~2.257 | <0.001 |
| TP53INP1       | <0.001 | 1.504 | 1.341~1.686 | <0.001 |
| CTD-3099C6.9   | <0.001 | 2.105 | 1.749~2.533 | <0.001 |
| TTC39A         | <0.001 | 1.615 | 1.437~1.815 | <0.001 |
| LURAP1L        | <0.001 | 1.542 | 1.371~1.734 | <0.001 |
| APIP           | <0.001 | 1.275 | 1.176~1.382 | <0.001 |
| NIPSNAP3A      | <0.001 | 1.374 | 1.258~1.502 | <0.001 |
| RP11-6O2.3     | <0.001 | 1.801 | 1.533~2.116 | <0.001 |
| TTC27          | <0.001 | 1.950 | 1.646~2.309 | <0.001 |
| AC002456.2     | <0.001 | 1.318 | 1.222~1.421 | <0.001 |
| ADAP1          | <0.001 | 0.821 | 0.776~0.869 | <0.001 |
| IGJ            | <0.001 | 1.180 | 1.118~1.244 | <0.001 |
| MC4R           | <0.001 | 0.492 | 0.372~0.651 | <0.001 |
| HORMAD2        | <0.001 | 3.073 | 2.189~4.315 | <0.001 |
| THBS1          | <0.001 | 1.275 | 1.213~1.341 | <0.001 |
| ICAM3          | <0.001 | 1.435 | 1.291~1.596 | <0.001 |
| CALML3-AS1     | <0.001 | 0.172 | 0.073~0.407 | <0.001 |
| DDX27          | <0.001 | 1.559 | 1.368~1.777 | <0.001 |
| GSTO2          | <0.001 | 0.702 | 0.639~0.771 | <0.001 |
| CBS            | <0.001 | 0.782 | 0.731~0.836 | <0.001 |
| ACP5           | <0.001 | 1.220 | 1.156~1.288 | <0.001 |
| ITGAX          | <0.001 | 1.318 | 1.219~1.426 | <0.001 |
| IGKC           | <0.001 | 1.109 | 1.079~1.140 | <0.001 |
| FAM188B        | <0.001 | 1.402 | 1.260~1.560 | <0.001 |
| CTD-2619J13.17 | <0.001 | 2.218 | 1.841~2.673 | <0.001 |
| CALHM1         | <0.001 | 0.404 | 0.294~0.555 | <0.001 |
| SMAD9          | <0.001 | 0.692 | 0.635~0.754 | <0.001 |
| TMEM53         | <0.001 | 1.543 | 1.354~1.759 | <0.001 |
| CTD-2267D19.3  | <0.001 | 1.481 | 1.324~1.657 | <0.001 |
| FER1L4         | <0.001 | 1.319 | 1.232~1.412 | <0.001 |
| PLCH2          | <0.001 | 0.783 | 0.736~0.833 | <0.001 |
| FBXL16         | <0.001 | 0.816 | 0.777~0.858 | <0.001 |
| SLC23A3        | <0.001 | 1.568 | 1.309~1.879 | <0.001 |
| CAMKMT         | <0.001 | 1.648 | 1.444~1.882 | <0.001 |
| CA11           | <0.001 | 0.805 | 0.765~0.846 | <0.001 |
| HPR            | <0.001 | 0.784 | 0.744~0.827 | <0.001 |
| RSBN1L-AS1     | <0.001 | 1.443 | 1.294~1.609 | <0.001 |
| MAK16          | <0.001 | 1.633 | 1.423~1.873 | <0.001 |
| RNF219-AS1     | <0.001 | 0.716 | 0.657~0.781 | <0.001 |
| PPAPDC1A       | <0.001 | 0.778 | 0.729~0.830 | <0.001 |
| DPP3           | <0.001 | 1.682 | 1.458~1.941 | <0.001 |
| USP15          | <0.001 | 1.459 | 1.296~1.643 | <0.001 |
| TFRC           | <0.001 | 1.437 | 1.306~1.581 | <0.001 |

|               |        |       |             |        |
|---------------|--------|-------|-------------|--------|
| SCAF4         | <0.001 | 1.627 | 1.411~1.877 | <0.001 |
| IGSF6         | <0.001 | 1.366 | 1.258~1.484 | <0.001 |
| LAMP3         | <0.001 | 2.007 | 1.691~2.382 | <0.001 |
| TMEM194B      | <0.001 | 2.252 | 1.880~2.697 | <0.001 |
| CHRNE         | <0.001 | 1.857 | 1.634~2.112 | <0.001 |
| AC068831.6    | <0.001 | 1.666 | 1.274~2.177 | <0.001 |
| AL590822.1    | <0.001 | 2.684 | 2.027~3.553 | <0.001 |
| PIK3C2G       | <0.001 | 0.368 | 0.203~0.667 | <0.001 |
| PEX13         | <0.001 | 1.719 | 1.511~1.957 | <0.001 |
| BSPRY         | <0.001 | 0.474 | 0.389~0.579 | <0.001 |
| SSTR3         | <0.001 | 0.657 | 0.568~0.761 | <0.001 |
| ANKRD19P      | <0.001 | 0.730 | 0.656~0.812 | <0.001 |
| RRP7B         | <0.001 | 0.782 | 0.735~0.831 | <0.001 |
| C15orf41      | <0.001 | 1.790 | 1.538~2.084 | <0.001 |
| RP5-864K19.4  | <0.001 | 1.852 | 1.602~2.142 | <0.001 |
| RAB11A        | <0.001 | 1.344 | 1.216~1.486 | <0.001 |
| RP11-290F20.2 | <0.001 | 2.282 | 1.698~3.067 | <0.001 |
| RP11-617F23.1 | <0.001 | 0.801 | 0.745~0.861 | <0.001 |
| LRCH1         | <0.001 | 1.740 | 1.513~2.001 | <0.001 |
| TEX26         | <0.001 | 1.413 | 1.302~1.534 | <0.001 |
| DSG2          | <0.001 | 1.547 | 1.376~1.740 | <0.001 |
| RARS2         | <0.001 | 1.615 | 1.411~1.849 | <0.001 |
| TMED4         | <0.001 | 1.477 | 1.317~1.656 | <0.001 |
| UTP15         | <0.001 | 1.755 | 1.540~1.999 | <0.001 |
| CTDSP1        | <0.001 | 1.580 | 1.360~1.834 | <0.001 |
| CASZ1         | <0.001 | 1.456 | 1.300~1.632 | <0.001 |
| IMPA2         | <0.001 | 1.448 | 1.327~1.579 | <0.001 |
| IQCH          | <0.001 | 2.165 | 1.780~2.633 | <0.001 |
| TTC7A         | <0.001 | 1.870 | 1.615~2.165 | <0.001 |
| AC072062.1    | <0.001 | 2.925 | 2.203~3.883 | <0.001 |
| RP5-1021I20.2 | <0.001 | 2.420 | 1.845~3.176 | <0.001 |
| RP11-2C24.4   | <0.001 | 1.959 | 1.662~2.309 | <0.001 |
| TBX21         | <0.001 | 1.508 | 1.290~1.762 | <0.001 |
| SLBP          | <0.001 | 1.433 | 1.282~1.602 | <0.001 |
| FLJ30594      | <0.001 | 0.761 | 0.708~0.818 | <0.001 |
| PTPN13        | <0.001 | 1.472 | 1.345~1.612 | <0.001 |
| KCNG4         | <0.001 | 0.530 | 0.386~0.727 | <0.001 |
| LRRC69        | <0.001 | 2.012 | 1.682~2.406 | <0.001 |
| ZNF354A       | <0.001 | 1.711 | 1.504~1.948 | <0.001 |
| CXCR3         | <0.001 | 1.321 | 1.164~1.498 | <0.001 |
| HSPB8         | <0.001 | 0.815 | 0.774~0.858 | <0.001 |
| CD2AP         | <0.001 | 1.802 | 1.563~2.077 | <0.001 |
| MESDC1        | <0.001 | 1.537 | 1.396~1.692 | <0.001 |
| TMEM229A      | <0.001 | 0.719 | 0.640~0.806 | <0.001 |
| FGL2          | <0.001 | 1.391 | 1.272~1.521 | <0.001 |
| TFEC          | <0.001 | 1.499 | 1.346~1.670 | <0.001 |
| RAPGEF4       | <0.001 | 0.786 | 0.740~0.835 | <0.001 |
| CNOT3         | <0.001 | 1.246 | 1.152~1.348 | <0.001 |
| TMTC3         | <0.001 | 1.883 | 1.600~2.217 | <0.001 |
| ASCL5         | <0.001 | 0.510 | 0.418~0.621 | <0.001 |
| CUL1          | <0.001 | 1.430 | 1.274~1.606 | <0.001 |
| ANXA2R        | <0.001 | 1.586 | 1.432~1.757 | <0.001 |

|               |        |       |             |        |
|---------------|--------|-------|-------------|--------|
| C9orf40       | <0.001 | 1.690 | 1.456~1.962 | <0.001 |
| C3orf17       | <0.001 | 1.504 | 1.340~1.688 | <0.001 |
| ZNF222        | <0.001 | 1.734 | 1.512~1.989 | <0.001 |
| SPI1          | <0.001 | 1.234 | 1.164~1.308 | <0.001 |
| RP4-798P15.3  | <0.001 | 2.409 | 1.981~2.929 | <0.001 |
| ADAP2         | <0.001 | 1.481 | 1.350~1.625 | <0.001 |
| MITD1         | <0.001 | 1.446 | 1.292~1.619 | <0.001 |
| C1orf226      | <0.001 | 1.362 | 1.258~1.475 | <0.001 |
| DHX16         | <0.001 | 1.914 | 1.602~2.287 | <0.001 |
| CCND2         | <0.001 | 1.296 | 1.199~1.399 | <0.001 |
| APCDD1L-AS1   | <0.001 | 1.362 | 1.248~1.486 | <0.001 |
| C1orf131      | <0.001 | 1.532 | 1.367~1.717 | <0.001 |
| AS3MT         | <0.001 | 0.707 | 0.639~0.784 | <0.001 |
| LINC00327     | <0.001 | 1.941 | 1.657~2.272 | <0.001 |
| FPR1          | <0.001 | 1.270 | 1.193~1.352 | <0.001 |
| NEBL-AS1      | <0.001 | 0.711 | 0.649~0.777 | <0.001 |
| ZNF865        | <0.001 | 1.405 | 1.259~1.567 | <0.001 |
| PARN          | <0.001 | 1.840 | 1.576~2.150 | <0.001 |
| ERRF1         | <0.001 | 1.494 | 1.370~1.628 | <0.001 |
| KCNH6         | <0.001 | 0.367 | 0.243~0.555 | <0.001 |
| PGAM1         | <0.001 | 0.821 | 0.765~0.882 | <0.001 |
| LYRM9         | <0.001 | 0.716 | 0.660~0.776 | <0.001 |
| TNFSF8        | <0.001 | 1.541 | 1.360~1.746 | <0.001 |
| RP11-87H9.3   | <0.001 | 3.257 | 2.319~4.574 | <0.001 |
| CMTR2         | <0.001 | 1.568 | 1.393~1.765 | <0.001 |
| ADAMTS19-AS1  | <0.001 | 0.432 | 0.309~0.606 | <0.001 |
| B4GALT1       | <0.001 | 1.448 | 1.322~1.585 | <0.001 |
| HCK           | <0.001 | 1.373 | 1.266~1.490 | <0.001 |
| CHP2          | <0.001 | 0.174 | 0.093~0.324 | <0.001 |
| LINC00880     | <0.001 | 1.411 | 1.267~1.571 | <0.001 |
| ZNF394        | <0.001 | 1.465 | 1.272~1.687 | <0.001 |
| CDK7          | <0.001 | 1.590 | 1.410~1.793 | <0.001 |
| GRINA         | <0.001 | 0.804 | 0.753~0.859 | <0.001 |
| JAM3          | <0.001 | 1.475 | 1.324~1.643 | <0.001 |
| RP11-783K16.5 | <0.001 | 1.334 | 1.244~1.431 | <0.001 |
| GZMH          | <0.001 | 1.328 | 1.217~1.448 | <0.001 |
| GMIP          | <0.001 | 1.457 | 1.289~1.647 | <0.001 |
| RP11-71N10.1  | <0.001 | 1.456 | 1.326~1.599 | <0.001 |
| PRUNE         | <0.001 | 2.019 | 1.728~2.360 | <0.001 |
| AL049840.1    | <0.001 | 1.805 | 1.554~2.097 | <0.001 |
| UQCRC2        | <0.001 | 0.778 | 0.713~0.849 | <0.001 |
| RAB26         | <0.001 | 0.792 | 0.743~0.844 | <0.001 |
| EEF2K         | <0.001 | 1.564 | 1.392~1.758 | <0.001 |
| SPATA1        | <0.001 | 1.428 | 1.315~1.551 | <0.001 |
| CTC-301O7.4   | <0.001 | 2.159 | 1.850~2.519 | <0.001 |
| DHX37         | <0.001 | 2.089 | 1.764~2.472 | <0.001 |
| AC083899.3    | <0.001 | 2.513 | 1.961~3.220 | <0.001 |
| RP11-59H7.3   | <0.001 | 2.875 | 2.122~3.894 | <0.001 |
| MPV17L2       | <0.001 | 1.756 | 1.524~2.022 | <0.001 |
| DNER          | <0.001 | 0.803 | 0.758~0.851 | <0.001 |
| CRIP3         | <0.001 | 0.766 | 0.713~0.824 | <0.001 |
| RB1           | <0.001 | 1.319 | 1.215~1.430 | <0.001 |

|               |        |       |             |        |
|---------------|--------|-------|-------------|--------|
| BEX4          | <0.001 | 0.826 | 0.778~0.877 | <0.001 |
| ETF1          | <0.001 | 1.591 | 1.398~1.810 | <0.001 |
| ZNF845        | <0.001 | 1.804 | 1.542~2.111 | <0.001 |
| RP11-157J24.1 | <0.001 | 2.864 | 2.140~3.832 | <0.001 |
| B4GALT3       | <0.001 | 1.466 | 1.296~1.659 | <0.001 |
| CCKBR         | <0.001 | 0.755 | 0.695~0.820 | <0.001 |
| AC079776.7    | <0.001 | 0.565 | 0.464~0.689 | <0.001 |
| POLR3C        | <0.001 | 1.594 | 1.367~1.857 | <0.001 |
| C20orf26      | <0.001 | 1.656 | 1.486~1.845 | <0.001 |
| RP11-640M9.2  | <0.001 | 1.451 | 1.334~1.579 | <0.001 |
| CLEC2L        | <0.001 | 0.795 | 0.750~0.843 | <0.001 |
| SLC25A13      | <0.001 | 1.632 | 1.448~1.839 | <0.001 |
| USP14         | <0.001 | 1.452 | 1.280~1.646 | <0.001 |
| LINC00998     | <0.001 | 1.276 | 1.174~1.388 | <0.001 |
| HTRA1         | <0.001 | 0.810 | 0.761~0.862 | <0.001 |
| ZNF347        | <0.001 | 1.848 | 1.618~2.111 | <0.001 |
| FADS1         | <0.001 | 0.677 | 0.616~0.745 | <0.001 |
| DMPK          | <0.001 | 1.356 | 1.253~1.468 | <0.001 |
| LHX3          | <0.001 | 0.576 | 0.455~0.730 | <0.001 |
| PRDX6         | <0.001 | 1.251 | 1.161~1.347 | <0.001 |
| MMRN2         | <0.001 | 1.490 | 1.331~1.669 | <0.001 |
| C5orf63       | <0.001 | 1.468 | 1.324~1.627 | <0.001 |
| SLC31A1       | <0.001 | 1.667 | 1.478~1.880 | <0.001 |
| PLCXD3        | <0.001 | 0.670 | 0.589~0.762 | <0.001 |
| ACVRL1        | <0.001 | 1.436 | 1.308~1.577 | <0.001 |
| SLC38A9       | <0.001 | 1.924 | 1.581~2.342 | <0.001 |
| RP11-387A1.5  | <0.001 | 1.801 | 1.424~2.279 | <0.001 |
| TACSTD2       | <0.001 | 1.247 | 1.126~1.381 | <0.001 |
| ZCCHC8        | <0.001 | 1.636 | 1.463~1.830 | <0.001 |
| POLL          | <0.001 | 0.682 | 0.615~0.757 | <0.001 |
| CDC25B        | <0.001 | 1.435 | 1.301~1.582 | <0.001 |
| L1CAM         | <0.001 | 0.817 | 0.779~0.856 | <0.001 |
| KRT18         | <0.001 | 1.211 | 1.125~1.303 | <0.001 |
| PCYT2         | <0.001 | 0.703 | 0.638~0.776 | <0.001 |
| VSTM2B        | <0.001 | 0.822 | 0.780~0.867 | <0.001 |
| NR1I2         | <0.001 | 1.728 | 1.353~2.207 | <0.001 |
| LINC00237     | <0.001 | 0.786 | 0.740~0.835 | <0.001 |
| AC004980.10   | <0.001 | 2.182 | 1.843~2.583 | <0.001 |
| KIAA1549L     | <0.001 | 0.661 | 0.594~0.734 | <0.001 |
| RP11-127B20.2 | <0.001 | 0.779 | 0.725~0.837 | <0.001 |
| TEX22         | <0.001 | 0.546 | 0.472~0.632 | <0.001 |
| KPNB1         | <0.001 | 1.480 | 1.345~1.627 | <0.001 |
| VRK2          | <0.001 | 1.485 | 1.349~1.634 | <0.001 |
| HNRNPR        | <0.001 | 1.699 | 1.503~1.921 | <0.001 |
| RUSC2         | <0.001 | 0.624 | 0.550~0.709 | <0.001 |
| HTATIP2       | <0.001 | 1.357 | 1.257~1.466 | <0.001 |
| AC097724.3    | <0.001 | 0.688 | 0.618~0.765 | <0.001 |
| RIBC2         | <0.001 | 1.572 | 1.409~1.754 | <0.001 |
| SESN2         | <0.001 | 1.397 | 1.243~1.571 | <0.001 |
| SLC6A17       | <0.001 | 0.784 | 0.737~0.835 | <0.001 |
| ZNF488        | <0.001 | 0.769 | 0.725~0.817 | <0.001 |
| RP11-64K12.10 | <0.001 | 0.482 | 0.392~0.594 | <0.001 |

|                |        |       |             |        |
|----------------|--------|-------|-------------|--------|
| SLC44A3        | <0.001 | 1.328 | 1.203~1.467 | <0.001 |
| SAMD14         | <0.001 | 0.748 | 0.686~0.817 | <0.001 |
| RP11-53B2.6    | <0.001 | 1.934 | 1.639~2.282 | <0.001 |
| OSCAR          | <0.001 | 1.301 | 1.210~1.398 | <0.001 |
| PRSS35         | <0.001 | 0.745 | 0.687~0.808 | <0.001 |
| SLA2           | <0.001 | 1.830 | 1.479~2.265 | <0.001 |
| HTR6           | <0.001 | 0.479 | 0.360~0.638 | <0.001 |
| CLEC7A         | <0.001 | 1.370 | 1.266~1.481 | <0.001 |
| APCDD1L        | <0.001 | 1.262 | 1.150~1.386 | <0.001 |
| C3orf38        | <0.001 | 1.642 | 1.432~1.882 | <0.001 |
| RP11-455F5.3   | <0.001 | 0.681 | 0.607~0.764 | <0.001 |
| AC090425.1     | <0.001 | 0.712 | 0.639~0.793 | <0.001 |
| MSH2           | <0.001 | 1.446 | 1.295~1.615 | <0.001 |
| CTD-2201118.1  | <0.001 | 2.251 | 1.678~3.019 | <0.001 |
| SHKBP1         | <0.001 | 1.287 | 1.209~1.370 | <0.001 |
| TRIB2          | <0.001 | 1.353 | 1.263~1.449 | <0.001 |
| YARS2          | <0.001 | 1.617 | 1.409~1.855 | <0.001 |
| RP11-86H7.6    | <0.001 | 2.739 | 2.067~3.629 | <0.001 |
| KATNA1         | <0.001 | 1.827 | 1.532~2.180 | <0.001 |
| RP11-247A12.2  | <0.001 | 0.387 | 0.298~0.502 | <0.001 |
| PDIA2          | <0.001 | 0.818 | 0.777~0.862 | <0.001 |
| TEX261         | <0.001 | 1.677 | 1.479~1.902 | <0.001 |
| ZFAND6         | <0.001 | 1.843 | 1.622~2.094 | <0.001 |
| TNFRSF10D      | <0.001 | 1.594 | 1.416~1.796 | <0.001 |
| PANK1          | <0.001 | 0.633 | 0.562~0.713 | <0.001 |
| SEMA4C         | <0.001 | 1.829 | 1.584~2.111 | <0.001 |
| DDX19B         | <0.001 | 1.517 | 1.320~1.743 | <0.001 |
| ANKRD55        | <0.001 | 0.474 | 0.387~0.580 | <0.001 |
| MEOX2          | <0.001 | 1.421 | 1.343~1.502 | <0.001 |
| TSPYL1         | <0.001 | 0.676 | 0.612~0.747 | <0.001 |
| DERL3          | <0.001 | 1.388 | 1.278~1.507 | <0.001 |
| MEIS3P1        | <0.001 | 1.506 | 1.362~1.667 | <0.001 |
| LINC01088      | <0.001 | 0.836 | 0.801~0.872 | <0.001 |
| CIDEA          | <0.001 | 0.625 | 0.537~0.729 | <0.001 |
| MKLN1-AS1      | <0.001 | 0.675 | 0.603~0.756 | <0.001 |
| TFB2M          | <0.001 | 1.813 | 1.571~2.093 | <0.001 |
| BRIX1          | <0.001 | 1.492 | 1.323~1.682 | <0.001 |
| HAND2-AS1      | <0.001 | 1.396 | 1.264~1.542 | <0.001 |
| RRM2P3         | <0.001 | 2.492 | 2.009~3.091 | <0.001 |
| RP11-1018N14.5 | <0.001 | 1.861 | 1.482~2.336 | <0.001 |
| SREK1          | <0.001 | 1.342 | 1.244~1.449 | <0.001 |
| ZSCAN20        | <0.001 | 1.783 | 1.515~2.099 | <0.001 |
| PIH1D2         | <0.001 | 1.531 | 1.362~1.721 | <0.001 |
| MSH6           | <0.001 | 1.613 | 1.438~1.810 | <0.001 |
| ZC3H12D        | <0.001 | 1.447 | 1.299~1.612 | <0.001 |
| DDX11          | <0.001 | 1.432 | 1.314~1.559 | <0.001 |
| RAPGEF3        | <0.001 | 0.708 | 0.658~0.762 | <0.001 |
| RP11-435O5.2   | <0.001 | 2.030 | 1.629~2.530 | <0.001 |
| UBE2FP1        | <0.001 | 2.182 | 1.773~2.684 | <0.001 |
| AC073283.4     | <0.001 | 0.684 | 0.617~0.759 | <0.001 |
| CTSS           | <0.001 | 1.325 | 1.244~1.412 | <0.001 |
| LILRB2         | <0.001 | 1.366 | 1.259~1.482 | <0.001 |

|                 |        |       |             |        |
|-----------------|--------|-------|-------------|--------|
| PALMD           | <0.001 | 1.475 | 1.331~1.635 | <0.001 |
| LLOXNC01-16G2.1 | <0.001 | 0.508 | 0.403~0.641 | <0.001 |
| ZNF432          | <0.001 | 1.690 | 1.503~1.899 | <0.001 |
| TXN             | <0.001 | 1.227 | 1.149~1.310 | <0.001 |
| AC005330.2      | <0.001 | 0.604 | 0.533~0.684 | <0.001 |
| BAG1            | <0.001 | 0.829 | 0.779~0.882 | <0.001 |
| RP11-17112.2    | <0.001 | 2.080 | 1.673~2.586 | <0.001 |
| PODXL           | <0.001 | 1.502 | 1.367~1.649 | <0.001 |
| USP39           | <0.001 | 1.639 | 1.431~1.877 | <0.001 |
| COTL1           | <0.001 | 1.310 | 1.209~1.420 | <0.001 |
| RP11-401P9.5    | <0.001 | 0.709 | 0.641~0.783 | <0.001 |
| CBWD6           | <0.001 | 1.315 | 1.189~1.455 | <0.001 |
| RBMS2           | <0.001 | 1.691 | 1.470~1.944 | <0.001 |
| TMEM179B        | <0.001 | 1.489 | 1.322~1.676 | <0.001 |
| SMN1            | <0.001 | 1.380 | 1.257~1.516 | <0.001 |
| EMX2OS          | <0.001 | 0.702 | 0.650~0.759 | <0.001 |
| CDC42BPG        | <0.001 | 1.406 | 1.199~1.647 | <0.001 |
| AGBL5           | <0.001 | 1.836 | 1.562~2.157 | <0.001 |
| CCR1            | <0.001 | 1.364 | 1.266~1.470 | <0.001 |
| HTR1E           | <0.001 | 0.604 | 0.485~0.753 | <0.001 |
| PPP3CB          | <0.001 | 0.770 | 0.716~0.829 | <0.001 |
| UNC93B1         | <0.001 | 1.290 | 1.201~1.385 | <0.001 |
| DOCK2           | <0.001 | 1.461 | 1.327~1.608 | <0.001 |
| ZNF766          | <0.001 | 2.010 | 1.692~2.389 | <0.001 |
| KBTBD8          | <0.001 | 1.736 | 1.448~2.081 | <0.001 |
| GCK             | <0.001 | 1.356 | 1.248~1.472 | <0.001 |
| BCORL1          | <0.001 | 1.686 | 1.472~1.930 | <0.001 |
| CAMK2D          | <0.001 | 1.431 | 1.304~1.570 | <0.001 |
| ZSCAN10         | <0.001 | 0.407 | 0.313~0.529 | <0.001 |
| PEF1            | <0.001 | 1.476 | 1.321~1.649 | <0.001 |
| CATSPER2        | <0.001 | 0.709 | 0.638~0.788 | <0.001 |
| CCDC137         | <0.001 | 1.492 | 1.341~1.661 | <0.001 |
| LRRK2           | <0.001 | 1.366 | 1.272~1.467 | <0.001 |
| TBCE            | <0.001 | 1.799 | 1.528~2.117 | <0.001 |
| CTNNB1          | <0.001 | 1.417 | 1.281~1.568 | <0.001 |
| TMEM179         | <0.001 | 0.815 | 0.775~0.856 | <0.001 |
| CPB2-AS1        | <0.001 | 0.531 | 0.462~0.611 | <0.001 |
| DNAH9           | <0.001 | 1.350 | 1.256~1.450 | <0.001 |
| SRP19           | <0.001 | 1.250 | 1.148~1.362 | <0.001 |
| TNFRSF9         | <0.001 | 3.052 | 2.090~4.457 | <0.001 |
| FKBP1A          | <0.001 | 1.359 | 1.242~1.487 | <0.001 |
| MAPKAPK3        | <0.001 | 1.595 | 1.408~1.806 | <0.001 |
| LINC00087       | <0.001 | 0.730 | 0.673~0.793 | <0.001 |
| CA2             | <0.001 | 1.296 | 1.216~1.382 | <0.001 |
| XXYLT1          | <0.001 | 1.569 | 1.398~1.760 | <0.001 |
| SNTG1           | <0.001 | 0.697 | 0.642~0.757 | <0.001 |
| RP11-428J1.5    | <0.001 | 2.872 | 2.336~3.530 | <0.001 |
| RP11-61A14.3    | <0.001 | 0.640 | 0.571~0.717 | <0.001 |
| EGF             | <0.001 | 1.652 | 1.444~1.889 | <0.001 |
| CWC25           | <0.001 | 1.776 | 1.542~2.046 | <0.001 |
| NEGR1           | <0.001 | 0.752 | 0.703~0.804 | <0.001 |
| RP11-1112C15.1  | <0.001 | 0.832 | 0.779~0.888 | <0.001 |

|               |        |       |             |        |
|---------------|--------|-------|-------------|--------|
| NDUFV3        | <0.001 | 1.690 | 1.440~1.984 | <0.001 |
| DES           | <0.001 | 1.324 | 1.238~1.415 | <0.001 |
| PSMD12        | <0.001 | 1.610 | 1.447~1.791 | <0.001 |
| CPSF6         | <0.001 | 1.301 | 1.199~1.412 | <0.001 |
| IMMT          | <0.001 | 1.489 | 1.290~1.719 | <0.001 |
| FSIP1         | <0.001 | 1.812 | 1.477~2.224 | <0.001 |
| KIAA1551      | <0.001 | 1.406 | 1.270~1.556 | <0.001 |
| NPC2          | <0.001 | 1.243 | 1.170~1.320 | <0.001 |
| MIR24-2       | <0.001 | 1.429 | 1.315~1.553 | <0.001 |
| RP11-284F21.7 | <0.001 | 0.828 | 0.785~0.873 | <0.001 |
| SNX4          | <0.001 | 1.505 | 1.359~1.667 | <0.001 |
| SHISA6        | <0.001 | 0.755 | 0.699~0.816 | <0.001 |
| COLGALT2      | <0.001 | 0.784 | 0.731~0.841 | <0.001 |
| AC123886.2    | <0.001 | 0.570 | 0.481~0.676 | <0.001 |
| TFAP2B        | <0.001 | 1.365 | 1.186~1.572 | <0.001 |
| SLA           | <0.001 | 1.387 | 1.290~1.493 | <0.001 |
| NUDT7         | <0.001 | 0.728 | 0.675~0.786 | <0.001 |
| CLEC9A        | <0.001 | 0.674 | 0.593~0.766 | <0.001 |
| KIAA0355      | <0.001 | 1.813 | 1.592~2.065 | <0.001 |
| RPL23AP79     | <0.001 | 1.422 | 1.293~1.564 | <0.001 |
| RREB1         | <0.001 | 1.573 | 1.411~1.754 | <0.001 |
| RGCC          | <0.001 | 0.842 | 0.798~0.888 | <0.001 |
| ITGAL         | <0.001 | 1.383 | 1.264~1.514 | <0.001 |
| LCA5L         | <0.001 | 1.684 | 1.486~1.908 | <0.001 |
| URB2          | <0.001 | 2.165 | 1.853~2.530 | <0.001 |
| RALGAPA2      | <0.001 | 1.618 | 1.412~1.854 | <0.001 |
| LDHAP4        | <0.001 | 1.688 | 1.523~1.872 | <0.001 |
| RP11-770J1.4  | <0.001 | 0.332 | 0.237~0.466 | <0.001 |
| RP11-421L21.3 | <0.001 | 1.540 | 1.375~1.724 | <0.001 |
| HLA-DPB1      | <0.001 | 1.197 | 1.144~1.254 | <0.001 |
| LILRB1        | <0.001 | 1.389 | 1.283~1.503 | <0.001 |
| PPP1R9B       | <0.001 | 0.706 | 0.618~0.807 | <0.001 |
| IGHG3         | <0.001 | 1.124 | 1.083~1.167 | <0.001 |
| CD302         | <0.001 | 1.487 | 1.350~1.638 | <0.001 |
| FERMT3        | <0.001 | 1.302 | 1.217~1.394 | <0.001 |
| FAM43A        | <0.001 | 1.495 | 1.357~1.647 | <0.001 |
| AVPI1         | <0.001 | 0.690 | 0.626~0.761 | <0.001 |
| ZDHHC11B      | <0.001 | 0.730 | 0.674~0.790 | <0.001 |
| RP11-48B3.4   | <0.001 | 1.925 | 1.677~2.210 | <0.001 |
| MAPK7         | <0.001 | 1.533 | 1.374~1.711 | <0.001 |
| SZT2          | <0.001 | 1.929 | 1.643~2.265 | <0.001 |
| SLC25A45      | <0.001 | 1.594 | 1.428~1.779 | <0.001 |
| SNAPIN        | <0.001 | 1.316 | 1.201~1.442 | <0.001 |
| C6orf3        | <0.001 | 0.743 | 0.685~0.805 | <0.001 |
| RNF145        | <0.001 | 1.494 | 1.346~1.659 | <0.001 |
| SLC48A1       | <0.001 | 0.711 | 0.653~0.774 | <0.001 |
| PFKM          | <0.001 | 0.766 | 0.702~0.836 | <0.001 |
| RP11-21A7A.2  | <0.001 | 0.625 | 0.557~0.703 | <0.001 |
| PPM1G         | <0.001 | 1.605 | 1.408~1.829 | <0.001 |
| ARHGAP31      | <0.001 | 0.729 | 0.656~0.810 | <0.001 |
| FA2H          | <0.001 | 0.814 | 0.772~0.859 | <0.001 |
| ATP8B2        | <0.001 | 1.716 | 1.517~1.941 | <0.001 |



|                |        |       |             |        |
|----------------|--------|-------|-------------|--------|
| AC005740.3     | <0.001 | 0.519 | 0.443~0.607 | <0.001 |
| IGDCC3         | <0.001 | 0.651 | 0.582~0.728 | <0.001 |
| IQCB1          | <0.001 | 1.634 | 1.447~1.846 | <0.001 |
| AC105053.3     | <0.001 | 0.186 | 0.118~0.293 | <0.001 |
| C20orf195      | <0.001 | 1.750 | 1.526~2.008 | <0.001 |
| LAMB4          | <0.001 | 1.984 | 1.625~2.422 | <0.001 |
| RP11-343L5.2   | <0.001 | 2.340 | 1.854~2.955 | <0.001 |
| TYROBP         | <0.001 | 1.245 | 1.177~1.318 | <0.001 |
| VCAM1          | <0.001 | 1.253 | 1.187~1.322 | <0.001 |
| LAPTM4A        | <0.001 | 1.282 | 1.193~1.377 | <0.001 |
| NCF1B          | <0.001 | 1.345 | 1.244~1.455 | <0.001 |
| SEC61B         | <0.001 | 1.320 | 1.225~1.423 | <0.001 |
| GHRHR          | <0.001 | 0.578 | 0.509~0.656 | <0.001 |
| PIK3R3         | <0.001 | 1.822 | 1.619~2.049 | <0.001 |
| C1QA           | <0.001 | 1.242 | 1.176~1.312 | <0.001 |
| MYL4           | <0.001 | 1.694 | 1.494~1.922 | <0.001 |
| NGB            | <0.001 | 0.807 | 0.749~0.869 | <0.001 |
| ZNF134         | <0.001 | 1.521 | 1.366~1.695 | <0.001 |
| CPNE9          | <0.001 | 0.709 | 0.643~0.782 | <0.001 |
| CCDC138        | <0.001 | 1.957 | 1.674~2.287 | <0.001 |
| RP11-686D22.7  | <0.001 | 1.795 | 1.568~2.054 | <0.001 |
| RDM1           | <0.001 | 1.781 | 1.564~2.029 | <0.001 |
| PRDM11         | <0.001 | 0.520 | 0.439~0.615 | <0.001 |
| AC114730.3     | <0.001 | 0.719 | 0.662~0.781 | <0.001 |
| RBM42          | <0.001 | 1.428 | 1.300~1.568 | <0.001 |
| TTC23          | <0.001 | 1.958 | 1.674~2.289 | <0.001 |
| NBEA           | <0.001 | 0.675 | 0.607~0.751 | <0.001 |
| SPOCK1         | <0.001 | 0.758 | 0.713~0.805 | <0.001 |
| SYNPR          | <0.001 | 0.825 | 0.780~0.873 | <0.001 |
| CD300A         | <0.001 | 1.393 | 1.289~1.505 | <0.001 |
| POLG2          | <0.001 | 1.633 | 1.430~1.866 | <0.001 |
| MAD2L2         | <0.001 | 1.402 | 1.295~1.519 | <0.001 |
| NBPF14         | <0.001 | 1.553 | 1.402~1.720 | <0.001 |
| DCP1B          | <0.001 | 1.607 | 1.398~1.847 | <0.001 |
| HR             | <0.001 | 0.758 | 0.699~0.821 | <0.001 |
| C1orf109       | <0.001 | 1.595 | 1.450~1.753 | <0.001 |
| SLAMF6         | <0.001 | 1.730 | 1.437~2.083 | <0.001 |
| NFIA           | <0.001 | 1.384 | 1.260~1.521 | <0.001 |
| C20orf24       | <0.001 | 1.389 | 1.248~1.546 | <0.001 |
| UBE2Z          | <0.001 | 1.806 | 1.541~2.116 | <0.001 |
| RP11-341N2.1   | <0.001 | 0.581 | 0.503~0.672 | <0.001 |
| UPF3B          | <0.001 | 1.374 | 1.243~1.519 | <0.001 |
| GEMIN6         | <0.001 | 1.674 | 1.457~1.924 | <0.001 |
| TMED7-TICAM2   | <0.001 | 1.839 | 1.574~2.149 | <0.001 |
| CCDC85A        | <0.001 | 0.673 | 0.608~0.745 | <0.001 |
| RP11-373N22.3  | <0.001 | 0.266 | 0.190~0.373 | <0.001 |
| PDCD1          | <0.001 | 1.391 | 1.214~1.593 | <0.001 |
| CTD-2170G1.2   | <0.001 | 0.322 | 0.240~0.433 | <0.001 |
| RP11-381O7.3   | <0.001 | 1.863 | 1.602~2.167 | <0.001 |
| RP11-122K13.14 | <0.001 | 0.691 | 0.617~0.774 | <0.001 |
| RP11-230B22.1  | <0.001 | 1.898 | 1.621~2.224 | <0.001 |
| HECW1          | <0.001 | 0.622 | 0.557~0.695 | <0.001 |

|                |        |       |             |        |
|----------------|--------|-------|-------------|--------|
| C19orf12       | <0.001 | 1.743 | 1.516~2.005 | <0.001 |
| HNRNPD         | <0.001 | 1.363 | 1.246~1.492 | <0.001 |
| MYBL1          | <0.001 | 1.545 | 1.387~1.721 | <0.001 |
| ARHGAP17       | <0.001 | 1.544 | 1.352~1.765 | <0.001 |
| ZNF799         | <0.001 | 1.970 | 1.631~2.379 | <0.001 |
| POLE2          | <0.001 | 1.613 | 1.459~1.785 | <0.001 |
| ZNF137P        | <0.001 | 1.792 | 1.528~2.102 | <0.001 |
| TSPAN9         | <0.001 | 1.624 | 1.451~1.817 | <0.001 |
| SDCBP          | <0.001 | 1.362 | 1.255~1.480 | <0.001 |
| SLC16A4        | <0.001 | 1.504 | 1.374~1.647 | <0.001 |
| PROC           | <0.001 | 1.536 | 1.375~1.717 | <0.001 |
| TRADD          | <0.001 | 1.544 | 1.381~1.727 | <0.001 |
| CD36           | <0.001 | 1.332 | 1.244~1.427 | <0.001 |
| NBPF9          | <0.001 | 1.646 | 1.467~1.846 | <0.001 |
| ZNF600         | <0.001 | 2.086 | 1.780~2.444 | <0.001 |
| LPIN3          | <0.001 | 1.421 | 1.301~1.551 | <0.001 |
| INTS8          | <0.001 | 1.734 | 1.530~1.964 | <0.001 |
| RP5-1039K5.16  | <0.001 | 0.503 | 0.402~0.630 | <0.001 |
| TMEM176A       | <0.001 | 1.271 | 1.202~1.345 | <0.001 |
| SPTBN5         | <0.001 | 1.327 | 1.176~1.497 | <0.001 |
| PPP1R8P1       | <0.001 | 1.767 | 1.468~2.128 | <0.001 |
| GGACTION       | <0.001 | 1.526 | 1.383~1.684 | <0.001 |
| AC010642.1     | <0.001 | 1.685 | 1.437~1.976 | <0.001 |
| DTX2P1         | <0.001 | 2.013 | 1.728~2.345 | <0.001 |
| AAGAB          | <0.001 | 1.914 | 1.618~2.265 | <0.001 |
| CYFIP1         | <0.001 | 1.742 | 1.557~1.948 | <0.001 |
| CCT5           | <0.001 | 1.450 | 1.307~1.608 | <0.001 |
| C1QB           | <0.001 | 1.245 | 1.178~1.315 | <0.001 |
| TMED10         | <0.001 | 1.455 | 1.327~1.594 | <0.001 |
| SLC4A7         | <0.001 | 1.585 | 1.447~1.737 | <0.001 |
| SNX17          | <0.001 | 1.598 | 1.380~1.850 | <0.001 |
| ALDH3A1        | <0.001 | 1.354 | 1.253~1.463 | <0.001 |
| ZNF180         | <0.001 | 2.011 | 1.727~2.343 | <0.001 |
| CBX3           | <0.001 | 1.447 | 1.317~1.590 | <0.001 |
| CCL2           | <0.001 | 1.188 | 1.142~1.236 | <0.001 |
| TM2D1          | <0.001 | 1.322 | 1.200~1.457 | <0.001 |
| CTD-3193O13.11 | <0.001 | 0.756 | 0.698~0.818 | <0.001 |
| PRKD2          | <0.001 | 1.388 | 1.276~1.510 | <0.001 |
| CEP104         | <0.001 | 1.781 | 1.565~2.026 | <0.001 |
| ARNTL2         | <0.001 | 1.685 | 1.503~1.889 | <0.001 |
| DPH3           | <0.001 | 1.590 | 1.398~1.808 | <0.001 |
| IFNAR2         | <0.001 | 1.764 | 1.522~2.044 | <0.001 |
| OTX1           | <0.001 | 1.385 | 1.287~1.492 | <0.001 |
| LPPR1          | <0.001 | 0.804 | 0.767~0.843 | <0.001 |
| DLL4           | <0.001 | 1.458 | 1.333~1.594 | <0.001 |
| AGTR1          | <0.001 | 1.934 | 1.621~2.307 | <0.001 |
| GALNT16        | <0.001 | 0.692 | 0.636~0.753 | <0.001 |
| MRE11A         | <0.001 | 1.588 | 1.426~1.770 | <0.001 |
| DAPP1          | <0.001 | 1.625 | 1.408~1.876 | <0.001 |
| GPC1           | <0.001 | 1.463 | 1.331~1.607 | <0.001 |
| EIF4G2         | <0.001 | 1.382 | 1.266~1.509 | <0.001 |
| IER5           | <0.001 | 1.532 | 1.391~1.686 | <0.001 |

|               |        |       |             |        |
|---------------|--------|-------|-------------|--------|
| RXRG          | <0.001 | 0.727 | 0.665~0.796 | <0.001 |
| MTF1          | <0.001 | 1.905 | 1.641~2.212 | <0.001 |
| ZNF787        | <0.001 | 1.709 | 1.511~1.932 | <0.001 |
| SERTAD1       | <0.001 | 1.516 | 1.388~1.656 | <0.001 |
| WBP5          | <0.001 | 1.231 | 1.144~1.325 | <0.001 |
| ISY1-RAB43    | <0.001 | 1.776 | 1.552~2.033 | <0.001 |
| NPM2          | <0.001 | 0.805 | 0.762~0.851 | <0.001 |
| RAB33B        | <0.001 | 1.605 | 1.405~1.834 | <0.001 |
| DNAJC21       | <0.001 | 1.665 | 1.470~1.885 | <0.001 |
| SPAG1         | <0.001 | 1.550 | 1.403~1.712 | <0.001 |
| MAPRE3        | <0.001 | 0.771 | 0.716~0.830 | <0.001 |
| CPSF4         | <0.001 | 1.606 | 1.413~1.824 | <0.001 |
| RP11-680A11.5 | <0.001 | 1.666 | 1.482~1.873 | <0.001 |
| AC004899.1    | <0.001 | 0.578 | 0.480~0.694 | <0.001 |
| PPP1R3F       | <0.001 | 0.721 | 0.653~0.797 | <0.001 |
| FAM46C        | <0.001 | 1.628 | 1.405~1.886 | <0.001 |
| MALL          | <0.001 | 1.537 | 1.365~1.731 | <0.001 |
| RP1-257A7.5   | <0.001 | 0.839 | 0.801~0.879 | <0.001 |
| RARRES2       | <0.001 | 1.150 | 1.109~1.192 | <0.001 |
| VCP           | <0.001 | 1.999 | 1.690~2.365 | <0.001 |
| VWF           | <0.001 | 1.370 | 1.268~1.479 | <0.001 |
| CX3CL1        | <0.001 | 0.737 | 0.676~0.803 | <0.001 |
| CYBRD1        | <0.001 | 1.340 | 1.235~1.454 | <0.001 |
| SPN           | <0.001 | 1.421 | 1.274~1.585 | <0.001 |
| KRT7          | <0.001 | 1.341 | 1.249~1.440 | <0.001 |
| UBE2N         | <0.001 | 1.455 | 1.316~1.608 | <0.001 |
| MORN3         | <0.001 | 1.551 | 1.406~1.711 | <0.001 |
| BLK           | <0.001 | 0.520 | 0.418~0.647 | <0.001 |
| YPEL3         | <0.001 | 0.830 | 0.786~0.876 | <0.001 |
| PUSL1         | <0.001 | 1.569 | 1.408~1.749 | <0.001 |
| CTD-2521M24.4 | <0.001 | 1.667 | 1.298~2.140 | <0.001 |
| ICOS          | <0.001 | 2.068 | 1.471~2.908 | <0.001 |
| NIT2          | <0.001 | 1.382 | 1.237~1.545 | <0.001 |
| ORMDL2        | <0.001 | 1.400 | 1.281~1.531 | <0.001 |
| RP13-650J16.1 | <0.001 | 0.631 | 0.564~0.706 | <0.001 |
| MX1           | <0.001 | 1.321 | 1.238~1.409 | <0.001 |
| HRSP12        | <0.001 | 0.854 | 0.813~0.897 | <0.001 |
| E2F6          | <0.001 | 1.837 | 1.597~2.113 | <0.001 |
| PHF15         | <0.001 | 0.538 | 0.473~0.612 | <0.001 |
| KRT80         | <0.001 | 2.124 | 1.642~2.746 | <0.001 |
| RP11-104O19.2 | <0.001 | 0.060 | 0.031~0.115 | <0.001 |
| AGA           | <0.001 | 1.462 | 1.305~1.638 | <0.001 |
| C14orf142     | <0.001 | 1.462 | 1.303~1.641 | <0.001 |
| RP11-834C11.5 | <0.001 | 1.291 | 1.218~1.369 | <0.001 |
| MS4A14        | <0.001 | 1.506 | 1.353~1.676 | <0.001 |
| TMEM255A      | <0.001 | 1.370 | 1.275~1.473 | <0.001 |
| GRIN2B        | <0.001 | 0.666 | 0.581~0.764 | <0.001 |
| TSPAN10       | <0.001 | 1.529 | 1.366~1.711 | <0.001 |
| HNRNPH1       | <0.001 | 1.531 | 1.396~1.678 | <0.001 |
| CTD-2235C13.3 | <0.001 | 0.516 | 0.427~0.623 | <0.001 |
| ZNF304        | <0.001 | 1.851 | 1.605~2.134 | <0.001 |
| ITGB2         | <0.001 | 1.251 | 1.181~1.325 | <0.001 |

|               |        |       |             |        |
|---------------|--------|-------|-------------|--------|
| CACNA1B       | <0.001 | 0.709 | 0.644~0.781 | <0.001 |
| TMOD3         | <0.001 | 1.633 | 1.453~1.835 | <0.001 |
| AKAP12        | <0.001 | 1.295 | 1.214~1.382 | <0.001 |
| ZNF701        | <0.001 | 2.098 | 1.758~2.503 | <0.001 |
| GSC           | <0.001 | 1.466 | 1.340~1.605 | <0.001 |
| EXOSC9        | <0.001 | 1.509 | 1.340~1.700 | <0.001 |
| TOB1-AS1      | <0.001 | 0.594 | 0.521~0.678 | <0.001 |
| AC144652.1    | <0.001 | 0.632 | 0.558~0.716 | <0.001 |
| WDR3          | <0.001 | 1.505 | 1.369~1.654 | <0.001 |
| CHRNA7        | <0.001 | 0.554 | 0.479~0.642 | <0.001 |
| FBXO5         | <0.001 | 1.547 | 1.412~1.694 | <0.001 |
| TUBB4B        | <0.001 | 1.432 | 1.304~1.574 | <0.001 |
| MCL1          | <0.001 | 1.579 | 1.436~1.736 | <0.001 |
| RP11-473M20.9 | <0.001 | 1.680 | 1.470~1.919 | <0.001 |
| BTG1          | <0.001 | 1.311 | 1.205~1.427 | <0.001 |
| SNORD3B-2     | <0.001 | 1.248 | 1.179~1.321 | <0.001 |
| AC012314.8    | <0.001 | 1.828 | 1.500~2.228 | <0.001 |
| ZDHHC18       | <0.001 | 1.808 | 1.575~2.076 | <0.001 |
| SPRED3        | <0.001 | 1.453 | 1.343~1.572 | <0.001 |
| NCF4          | <0.001 | 1.345 | 1.248~1.450 | <0.001 |
| BSN-AS2       | <0.001 | 0.263 | 0.181~0.382 | <0.001 |
| RP11-483I13.5 | <0.001 | 1.760 | 1.505~2.060 | <0.001 |
| PRKG2         | <0.001 | 0.483 | 0.391~0.598 | <0.001 |
| NCKAP1L       | <0.001 | 1.433 | 1.309~1.568 | <0.001 |
| STX11         | <0.001 | 1.554 | 1.380~1.750 | <0.001 |
| USP4          | <0.001 | 1.626 | 1.404~1.884 | <0.001 |
| FADS2         | <0.001 | 0.772 | 0.722~0.824 | <0.001 |
| C21orf62      | <0.001 | 1.288 | 1.217~1.362 | <0.001 |
| ERVK3-1       | <0.001 | 1.369 | 1.250~1.499 | <0.001 |
| LRIG1         | <0.001 | 0.774 | 0.721~0.832 | <0.001 |
| NOL8          | <0.001 | 1.601 | 1.420~1.805 | <0.001 |
| RP11-434H6.6  | <0.001 | 2.048 | 1.709~2.454 | <0.001 |
| CDR1          | <0.001 | 0.809 | 0.764~0.855 | <0.001 |
| ZNF618        | <0.001 | 1.718 | 1.535~1.923 | <0.001 |
| SLAIN2        | <0.001 | 1.509 | 1.376~1.655 | <0.001 |
| RFX1          | <0.001 | 1.601 | 1.406~1.823 | <0.001 |
| NEU1          | <0.001 | 1.576 | 1.375~1.807 | <0.001 |
| POFUT1        | <0.001 | 1.805 | 1.612~2.021 | <0.001 |
| FAP           | <0.001 | 1.329 | 1.238~1.426 | <0.001 |
| OTUD7A        | <0.001 | 0.664 | 0.597~0.739 | <0.001 |
| TDP1          | <0.001 | 1.910 | 1.667~2.188 | <0.001 |
| MRPL23-AS1    | <0.001 | 0.554 | 0.468~0.656 | <0.001 |
| NAT1          | <0.001 | 1.800 | 1.579~2.053 | <0.001 |
| ECSCR         | <0.001 | 1.242 | 1.170~1.319 | <0.001 |
| FN3K          | <0.001 | 0.791 | 0.744~0.840 | <0.001 |
| LCNL1         | <0.001 | 0.813 | 0.774~0.854 | <0.001 |
| RP11-512H23.2 | <0.001 | 1.368 | 1.244~1.505 | <0.001 |
| VNN2          | <0.001 | 1.453 | 1.325~1.593 | <0.001 |
| AGAP2         | <0.001 | 0.824 | 0.777~0.874 | <0.001 |
| SMYD2         | <0.001 | 1.335 | 1.234~1.443 | <0.001 |
| GYPC          | <0.001 | 1.282 | 1.197~1.372 | <0.001 |
| MPP2          | <0.001 | 0.692 | 0.624~0.766 | <0.001 |

|               |        |       |             |        |
|---------------|--------|-------|-------------|--------|
| FAM169A       | <0.001 | 0.672 | 0.609~0.741 | <0.001 |
| RP11-361F15.2 | <0.001 | 0.730 | 0.668~0.798 | <0.001 |
| RP11-389G6.3  | <0.001 | 0.644 | 0.554~0.748 | <0.001 |
| AGPAT6        | <0.001 | 1.564 | 1.349~1.812 | <0.001 |
| POU4F1        | <0.001 | 1.701 | 1.525~1.896 | <0.001 |
| CTA-85E5.10   | <0.001 | 1.510 | 1.353~1.684 | <0.001 |
| DSCC1         | <0.001 | 1.687 | 1.469~1.937 | <0.001 |
| SCN11A        | <0.001 | 0.187 | 0.107~0.328 | <0.001 |
| INPP5J        | <0.001 | 0.665 | 0.602~0.734 | <0.001 |
| IL8           | <0.001 | 1.179 | 1.135~1.226 | <0.001 |
| RP11-372K14.2 | <0.001 | 0.520 | 0.442~0.613 | <0.001 |
| RP11-66N24.3  | <0.001 | 1.736 | 1.549~1.945 | <0.001 |
| GK            | <0.001 | 1.634 | 1.464~1.824 | <0.001 |
| WDR76         | <0.001 | 1.607 | 1.452~1.779 | <0.001 |
| DDIT4L        | <0.001 | 1.408 | 1.306~1.518 | <0.001 |
| PDE4A         | <0.001 | 0.684 | 0.625~0.749 | <0.001 |
| SASH3         | <0.001 | 1.423 | 1.308~1.549 | <0.001 |
| NOL9          | <0.001 | 1.797 | 1.534~2.105 | <0.001 |
| PCDH20        | <0.001 | 0.613 | 0.540~0.696 | <0.001 |
| PGS1          | <0.001 | 1.755 | 1.503~2.049 | <0.001 |
| ROR1          | <0.001 | 1.647 | 1.455~1.863 | <0.001 |
| DNAJC10       | <0.001 | 1.476 | 1.339~1.627 | <0.001 |
| RP11-9G1.3    | <0.001 | 0.538 | 0.467~0.621 | <0.001 |
| VENTX         | <0.001 | 1.376 | 1.241~1.526 | <0.001 |
| CD180         | <0.001 | 1.496 | 1.352~1.656 | <0.001 |
| KLRC3         | <0.001 | 0.774 | 0.720~0.833 | <0.001 |
| HLA-B         | <0.001 | 1.215 | 1.151~1.282 | <0.001 |
| QPCTL         | <0.001 | 1.475 | 1.326~1.640 | <0.001 |
| AC007879.7    | <0.001 | 1.845 | 1.571~2.167 | <0.001 |
| CD8B          | <0.001 | 1.450 | 1.278~1.646 | <0.001 |
| ZNF558        | <0.001 | 1.488 | 1.346~1.646 | <0.001 |
| YIPF2         | <0.001 | 1.721 | 1.496~1.980 | <0.001 |
| TTC25         | <0.001 | 1.499 | 1.337~1.681 | <0.001 |
| SEC61G        | <0.001 | 1.177 | 1.131~1.225 | <0.001 |
| TCTEX1D1      | <0.001 | 1.274 | 1.208~1.343 | <0.001 |
| ZNF69         | <0.001 | 1.885 | 1.619~2.194 | <0.001 |
| SDR16C5       | <0.001 | 0.614 | 0.509~0.740 | <0.001 |
| RP11-253M7.1  | <0.001 | 1.748 | 1.553~1.968 | <0.001 |
| CSRP2         | <0.001 | 1.271 | 1.199~1.347 | <0.001 |
| TMCC2         | <0.001 | 0.748 | 0.692~0.810 | <0.001 |
| TANK          | <0.001 | 1.650 | 1.463~1.862 | <0.001 |
| RP11-94L15.2  | <0.001 | 1.681 | 1.345~2.100 | <0.001 |
| UNC13C        | <0.001 | 0.696 | 0.627~0.772 | <0.001 |
| LIG1          | <0.001 | 1.481 | 1.353~1.621 | <0.001 |
| RNASEH2A      | <0.001 | 1.377 | 1.275~1.487 | <0.001 |
| CRTAM         | <0.001 | 1.512 | 1.300~1.759 | <0.001 |
| RP11-565F19.2 | <0.001 | 2.357 | 1.832~3.033 | <0.001 |
| EGFL6         | <0.001 | 1.627 | 1.441~1.837 | <0.001 |
| RP11-513I15.6 | <0.001 | 0.779 | 0.734~0.827 | <0.001 |
| DCHS1         | <0.001 | 1.654 | 1.499~1.825 | <0.001 |
| MRPS15        | <0.001 | 1.411 | 1.301~1.532 | <0.001 |
| SLC35D2       | <0.001 | 1.466 | 1.332~1.614 | <0.001 |

|                |        |       |             |        |
|----------------|--------|-------|-------------|--------|
| ZNF567         | <0.001 | 1.683 | 1.466~1.932 | <0.001 |
| GOLGA2         | <0.001 | 1.970 | 1.707~2.272 | <0.001 |
| LRRC46         | <0.001 | 1.485 | 1.358~1.624 | <0.001 |
| FAM127B        | <0.001 | 1.222 | 1.132~1.319 | <0.001 |
| MRPL47         | <0.001 | 1.454 | 1.302~1.624 | <0.001 |
| DOC2GP         | <0.001 | 0.561 | 0.476~0.661 | <0.001 |
| PTCRA          | <0.001 | 1.441 | 1.308~1.588 | <0.001 |
| CTD-2396E7.9   | <0.001 | 0.822 | 0.783~0.863 | <0.001 |
| ARPC3          | <0.001 | 1.302 | 1.194~1.419 | <0.001 |
| PRCD           | <0.001 | 0.776 | 0.727~0.828 | <0.001 |
| MECOM          | <0.001 | 1.664 | 1.494~1.854 | <0.001 |
| CHCHD3         | <0.001 | 1.624 | 1.450~1.818 | <0.001 |
| STXBP5L        | <0.001 | 0.642 | 0.570~0.724 | <0.001 |
| GRN            | <0.001 | 1.398 | 1.289~1.516 | <0.001 |
| RP11-1008C21.1 | <0.001 | 1.837 | 1.552~2.173 | <0.001 |
| DCAF4L1        | <0.001 | 2.577 | 1.914~3.469 | <0.001 |
| FOXJ1          | <0.001 | 1.255 | 1.194~1.318 | <0.001 |
| ZW10           | <0.001 | 1.821 | 1.553~2.136 | <0.001 |
| CEBPB          | <0.001 | 1.328 | 1.239~1.423 | <0.001 |
| OACYLP         | <0.001 | 1.574 | 1.349~1.836 | <0.001 |
| EGR1           | <0.001 | 1.202 | 1.148~1.258 | <0.001 |
| AP5S1          | <0.001 | 1.779 | 1.489~2.125 | <0.001 |
| CSPP1          | <0.001 | 1.454 | 1.318~1.603 | <0.001 |
| ABCD3          | <0.001 | 1.578 | 1.405~1.773 | <0.001 |
| RAB3A          | <0.001 | 0.792 | 0.750~0.836 | <0.001 |
| CCDC8          | <0.001 | 1.464 | 1.357~1.579 | <0.001 |
| VSIG4          | <0.001 | 1.281 | 1.207~1.359 | <0.001 |
| ABI3           | <0.001 | 1.367 | 1.263~1.480 | <0.001 |
| PIAS3          | <0.001 | 1.508 | 1.367~1.663 | <0.001 |
| AP001007.1     | <0.001 | 1.369 | 1.262~1.484 | <0.001 |
| RP1-170B16.1   | <0.001 | 0.620 | 0.549~0.701 | <0.001 |
| F2RL1          | <0.001 | 1.423 | 1.287~1.574 | <0.001 |
| RARRES1        | <0.001 | 1.306 | 1.222~1.394 | <0.001 |
| TMEM256-PLSCR3 | <0.001 | 1.553 | 1.391~1.734 | <0.001 |
| CTB-12O2.1     | <0.001 | 0.460 | 0.381~0.555 | <0.001 |
| OPHN1          | <0.001 | 0.726 | 0.673~0.783 | <0.001 |
| IQCC           | <0.001 | 1.750 | 1.501~2.041 | <0.001 |
| PRPF31         | <0.001 | 1.338 | 1.226~1.461 | <0.001 |
| MEI4           | <0.001 | 0.071 | 0.018~0.278 | <0.001 |
| BIRC3          | <0.001 | 1.416 | 1.303~1.539 | <0.001 |
| SPA17          | <0.001 | 1.415 | 1.305~1.534 | <0.001 |
| PDK1           | <0.001 | 1.733 | 1.547~1.941 | <0.001 |
| C16orf92       | <0.001 | 0.675 | 0.600~0.760 | <0.001 |
| C8orf46        | <0.001 | 0.768 | 0.718~0.822 | <0.001 |
| DICER1-AS1     | <0.001 | 0.771 | 0.724~0.822 | <0.001 |
| SLAMF7         | <0.001 | 1.415 | 1.255~1.596 | <0.001 |
| NAT2           | <0.001 | 1.612 | 1.389~1.870 | <0.001 |
| UROS           | <0.001 | 0.791 | 0.744~0.841 | <0.001 |
| KCTD10         | <0.001 | 1.561 | 1.400~1.741 | <0.001 |
| GPR141         | <0.001 | 1.565 | 1.334~1.837 | <0.001 |
| FTL            | <0.001 | 1.264 | 1.191~1.340 | <0.001 |
| CSF2RB         | <0.001 | 1.629 | 1.447~1.833 | <0.001 |

|               |        |       |             |        |
|---------------|--------|-------|-------------|--------|
| SRRM1         | <0.001 | 1.345 | 1.245~1.453 | <0.001 |
| CBWD2         | <0.001 | 1.487 | 1.324~1.671 | <0.001 |
| TDG           | <0.001 | 1.684 | 1.499~1.892 | <0.001 |
| H2AFZ         | <0.001 | 1.340 | 1.234~1.455 | <0.001 |
| ATRNL1        | <0.001 | 0.756 | 0.706~0.810 | <0.001 |
| RP11-420L9.5  | <0.001 | 1.516 | 1.375~1.671 | <0.001 |
| PSMB9         | <0.001 | 1.275 | 1.193~1.363 | <0.001 |
| LRIF1         | <0.001 | 1.520 | 1.358~1.702 | <0.001 |
| DEK           | <0.001 | 1.465 | 1.334~1.609 | <0.001 |
| OPCML         | <0.001 | 0.726 | 0.674~0.781 | <0.001 |
| LPP           | <0.001 | 1.738 | 1.559~1.938 | <0.001 |
| RP11-274H2.5  | <0.001 | 3.523 | 2.762~4.494 | <0.001 |
| VSIG10L       | <0.001 | 1.910 | 1.659~2.198 | <0.001 |
| AIG1          | <0.001 | 0.815 | 0.759~0.875 | <0.001 |
| POLR2F        | <0.001 | 0.821 | 0.777~0.868 | <0.001 |
| OTOG          | <0.001 | 0.500 | 0.416~0.600 | <0.001 |
| PGM5P2        | <0.001 | 1.608 | 1.404~1.842 | <0.001 |
| IP6K1         | <0.001 | 0.687 | 0.606~0.778 | <0.001 |
| ARHGAP27      | <0.001 | 1.575 | 1.405~1.765 | <0.001 |
| NSMCE2        | <0.001 | 1.625 | 1.403~1.881 | <0.001 |
| DLGAP1-AS2    | <0.001 | 1.541 | 1.393~1.704 | <0.001 |
| PCBP4         | <0.001 | 0.715 | 0.656~0.780 | <0.001 |
| FAM133B       | <0.001 | 1.445 | 1.314~1.589 | <0.001 |
| RP4-773N10.4  | <0.001 | 1.704 | 1.483~1.958 | <0.001 |
| SNX8          | <0.001 | 1.539 | 1.374~1.724 | <0.001 |
| ZFYVE27       | <0.001 | 0.666 | 0.586~0.758 | <0.001 |
| PLAC8         | <0.001 | 1.386 | 1.276~1.507 | <0.001 |
| PVR           | <0.001 | 1.748 | 1.538~1.987 | <0.001 |
| AP000783.1    | <0.001 | 0.578 | 0.492~0.679 | <0.001 |
| RAB11FIP4     | <0.001 | 0.700 | 0.650~0.754 | <0.001 |
| RNU6ATAC35P   | <0.001 | 0.528 | 0.453~0.616 | <0.001 |
| LARP4         | <0.001 | 1.718 | 1.513~1.951 | <0.001 |
| CCL20         | <0.001 | 1.267 | 1.190~1.349 | <0.001 |
| MAFF          | <0.001 | 1.348 | 1.255~1.448 | <0.001 |
| CDH6          | <0.001 | 1.555 | 1.413~1.712 | <0.001 |
| DDX47         | <0.001 | 1.431 | 1.276~1.603 | <0.001 |
| CTD-2231E14.8 | <0.001 | 1.454 | 1.321~1.600 | <0.001 |
| MYADM         | <0.001 | 1.394 | 1.295~1.501 | <0.001 |
| CIRBP         | <0.001 | 0.702 | 0.637~0.774 | <0.001 |
| PSD4          | <0.001 | 1.472 | 1.326~1.633 | <0.001 |
| MPPED1        | <0.001 | 0.789 | 0.741~0.839 | <0.001 |
| IRAK2         | <0.001 | 1.733 | 1.536~1.954 | <0.001 |
| PXDNL         | <0.001 | 1.774 | 1.574~1.999 | <0.001 |
| ENTPD7        | <0.001 | 2.260 | 1.901~2.687 | <0.001 |
| GZMA          | <0.001 | 1.281 | 1.196~1.372 | <0.001 |
| CAMLG         | <0.001 | 0.814 | 0.763~0.869 | <0.001 |
| ITK           | <0.001 | 1.487 | 1.320~1.674 | <0.001 |
| RP11-158M2.4  | <0.001 | 0.594 | 0.516~0.685 | <0.001 |
| ZNF383        | <0.001 | 1.710 | 1.489~1.964 | <0.001 |
| RP11-57H14.4  | <0.001 | 0.592 | 0.516~0.680 | <0.001 |
| NXPH3         | <0.001 | 0.706 | 0.646~0.772 | <0.001 |
| SYNGR1        | <0.001 | 0.665 | 0.611~0.724 | <0.001 |

|               |        |       |             |        |
|---------------|--------|-------|-------------|--------|
| RPL3          | <0.001 | 0.821 | 0.773~0.871 | <0.001 |
| BLOC1S3       | <0.001 | 1.876 | 1.579~2.230 | <0.001 |
| LTV1          | <0.001 | 1.559 | 1.384~1.757 | <0.001 |
| RIMS2         | <0.001 | 0.685 | 0.633~0.741 | <0.001 |
| APOBEC3B      | <0.001 | 1.655 | 1.493~1.834 | <0.001 |
| ACTL10        | <0.001 | 1.590 | 1.382~1.829 | <0.001 |
| SPIRE2        | <0.001 | 0.685 | 0.624~0.752 | <0.001 |
| AMMECR1       | <0.001 | 1.765 | 1.561~1.995 | <0.001 |
| S100A9        | <0.001 | 1.178 | 1.133~1.225 | <0.001 |
| MTOR          | <0.001 | 1.731 | 1.518~1.974 | <0.001 |
| C1RL-AS1      | <0.001 | 1.619 | 1.444~1.815 | <0.001 |
| SGSH          | <0.001 | 1.613 | 1.412~1.841 | <0.001 |
| SYAP1         | <0.001 | 1.935 | 1.638~2.287 | <0.001 |
| FAM66C        | <0.001 | 0.597 | 0.533~0.669 | <0.001 |
| UCP3          | <0.001 | 1.557 | 1.388~1.746 | <0.001 |
| CIC           | <0.001 | 1.616 | 1.433~1.823 | <0.001 |
| PPP4R1L       | <0.001 | 1.765 | 1.558~1.998 | <0.001 |
| CTD-2376I4.2  | <0.001 | 1.899 | 1.615~2.232 | <0.001 |
| CTD-3193O13.9 | <0.001 | 0.808 | 0.771~0.846 | <0.001 |
| GCA           | <0.001 | 1.382 | 1.263~1.512 | <0.001 |
| PABPC1L2A     | <0.001 | 0.610 | 0.525~0.709 | <0.001 |
| ZFYVE21       | <0.001 | 0.770 | 0.710~0.835 | <0.001 |
| TTLL12        | <0.001 | 0.672 | 0.604~0.747 | <0.001 |
| EPHB4         | <0.001 | 1.465 | 1.337~1.605 | <0.001 |
| HIST2H2BA     | <0.001 | 1.367 | 1.258~1.486 | <0.001 |
| ZZZ3          | <0.001 | 1.713 | 1.511~1.942 | <0.001 |
| PCDH15        | <0.001 | 0.819 | 0.781~0.859 | <0.001 |
| MAFK          | <0.001 | 1.599 | 1.438~1.778 | <0.001 |
| PLCG1         | <0.001 | 1.525 | 1.390~1.672 | <0.001 |
| PSMD2         | <0.001 | 1.579 | 1.390~1.793 | <0.001 |
| HLA-DMB       | <0.001 | 1.320 | 1.241~1.404 | <0.001 |
| PLB1          | <0.001 | 1.508 | 1.366~1.663 | <0.001 |
| RP11-496H1.2  | <0.001 | 0.690 | 0.633~0.752 | <0.001 |
| CYBB          | <0.001 | 1.352 | 1.259~1.452 | <0.001 |
| HOXB7         | <0.001 | 1.404 | 1.308~1.507 | <0.001 |
| FBXO41        | <0.001 | 0.698 | 0.640~0.762 | <0.001 |
| RP11-456P18.2 | <0.001 | 1.683 | 1.438~1.970 | <0.001 |
| EIF4E2        | <0.001 | 1.585 | 1.394~1.802 | <0.001 |
| RP11-497H16.7 | <0.001 | 1.497 | 1.353~1.656 | <0.001 |
| SLC29A1       | <0.001 | 1.456 | 1.321~1.605 | <0.001 |
| MAGT1         | <0.001 | 1.653 | 1.470~1.859 | <0.001 |
| RP11-493K23.1 | <0.001 | 0.610 | 0.515~0.721 | <0.001 |
| IFNLR1        | <0.001 | 1.559 | 1.365~1.779 | <0.001 |
| SPIN4         | <0.001 | 1.815 | 1.590~2.073 | <0.001 |
| ARL1          | <0.001 | 1.451 | 1.311~1.606 | <0.001 |
| EED           | <0.001 | 1.504 | 1.309~1.728 | <0.001 |
| C9orf117      | <0.001 | 1.265 | 1.189~1.346 | <0.001 |
| STEAP2        | <0.001 | 0.688 | 0.624~0.759 | <0.001 |
| C17orf53      | <0.001 | 1.689 | 1.487~1.919 | <0.001 |
| ANKRD32       | <0.001 | 1.714 | 1.493~1.968 | <0.001 |
| EBNA1BP2      | <0.001 | 1.561 | 1.393~1.750 | <0.001 |
| NRXN2         | <0.001 | 0.748 | 0.702~0.797 | <0.001 |



|              |        |       |             |        |
|--------------|--------|-------|-------------|--------|
| TMEM173      | <0.001 | 1.460 | 1.332~1.601 | <0.001 |
| PGM1         | <0.001 | 1.493 | 1.330~1.675 | <0.001 |
| LPHN2        | <0.001 | 1.391 | 1.290~1.501 | <0.001 |
| PDLIM4       | <0.001 | 1.260 | 1.205~1.317 | <0.001 |
| LRRTM1       | <0.001 | 0.690 | 0.635~0.750 | <0.001 |
| MAGEE1       | <0.001 | 0.745 | 0.686~0.809 | <0.001 |
| WNT5A        | <0.001 | 1.377 | 1.270~1.492 | <0.001 |
| TMEM158      | <0.001 | 1.273 | 1.200~1.350 | <0.001 |
| LINC00968    | <0.001 | 2.121 | 1.711~2.629 | <0.001 |
| PLXND1       | <0.001 | 1.250 | 1.176~1.327 | <0.001 |
| P4HA2        | <0.001 | 1.434 | 1.324~1.554 | <0.001 |
| RP11-174G6.5 | <0.001 | 3.853 | 2.815~5.272 | <0.001 |
| ZMYM4        | <0.001 | 1.793 | 1.584~2.030 | <0.001 |
| PPP1R18      | <0.001 | 1.476 | 1.350~1.613 | <0.001 |
| GJB6         | <0.001 | 0.784 | 0.734~0.837 | <0.001 |
| TMEM167B     | <0.001 | 1.526 | 1.366~1.704 | <0.001 |
| STXBP3       | <0.001 | 1.401 | 1.279~1.534 | <0.001 |
| HUS1         | <0.001 | 1.727 | 1.526~1.955 | <0.001 |
| FBXL5        | <0.001 | 1.511 | 1.334~1.712 | <0.001 |
| TMEM110      | <0.001 | 1.778 | 1.539~2.054 | <0.001 |
| ZBTB34       | <0.001 | 1.964 | 1.635~2.358 | <0.001 |
| NRD1         | <0.001 | 1.429 | 1.299~1.571 | <0.001 |
| RP11-391M1.4 | <0.001 | 0.645 | 0.584~0.712 | <0.001 |
| RELT         | <0.001 | 1.626 | 1.409~1.878 | <0.001 |
| MAPK13       | <0.001 | 1.454 | 1.331~1.588 | <0.001 |
| ZBTB40       | <0.001 | 1.918 | 1.648~2.233 | <0.001 |
| WBSCR16      | <0.001 | 2.009 | 1.710~2.360 | <0.001 |
| P2RY8        | <0.001 | 2.065 | 1.606~2.656 | <0.001 |
| RASAL1       | <0.001 | 0.822 | 0.775~0.870 | <0.001 |
| LRRC7        | <0.001 | 0.717 | 0.653~0.786 | <0.001 |
| ZNF326       | <0.001 | 1.397 | 1.262~1.546 | <0.001 |
| TLL1         | <0.001 | 0.452 | 0.350~0.585 | <0.001 |
| PAXBP1-AS1   | <0.001 | 0.463 | 0.387~0.554 | <0.001 |
| ITGA11       | <0.001 | 1.557 | 1.391~1.742 | <0.001 |
| GATA4        | <0.001 | 1.420 | 1.274~1.583 | <0.001 |
| THTPA        | <0.001 | 0.721 | 0.660~0.787 | <0.001 |
| GPIHBP1      | <0.001 | 0.744 | 0.691~0.802 | <0.001 |
| ADRA1A       | <0.001 | 0.568 | 0.505~0.640 | <0.001 |
| CKLF         | <0.001 | 1.363 | 1.255~1.481 | <0.001 |
| CCRL2        | <0.001 | 1.494 | 1.342~1.663 | <0.001 |
| NETO2        | <0.001 | 1.412 | 1.310~1.521 | <0.001 |
| C21orf88     | <0.001 | 1.558 | 1.390~1.746 | <0.001 |
| PGBD2        | <0.001 | 2.042 | 1.718~2.426 | <0.001 |
| FAIM         | <0.001 | 1.430 | 1.289~1.588 | <0.001 |
| RIOK3        | <0.001 | 1.546 | 1.362~1.754 | <0.001 |
| SLC5A6       | <0.001 | 1.791 | 1.573~2.039 | <0.001 |
| TP53I3       | <0.001 | 1.423 | 1.307~1.551 | <0.001 |
| HMGCL        | <0.001 | 1.495 | 1.339~1.670 | <0.001 |
| KLF1         | <0.001 | 0.271 | 0.193~0.381 | <0.001 |
| TARSL2       | <0.001 | 0.648 | 0.582~0.723 | <0.001 |
| MMP19        | <0.001 | 1.290 | 1.218~1.367 | <0.001 |
| SH2B3        | <0.001 | 1.601 | 1.451~1.766 | <0.001 |

|               |        |       |             |        |
|---------------|--------|-------|-------------|--------|
| USB1          | <0.001 | 1.712 | 1.512~1.937 | <0.001 |
| CTA-796E4.4   | <0.001 | 0.658 | 0.590~0.733 | <0.001 |
| HIATL1        | <0.001 | 1.549 | 1.388~1.727 | <0.001 |
| AC109642.1    | <0.001 | 2.303 | 1.622~3.271 | <0.001 |
| MED26         | <0.001 | 1.668 | 1.452~1.916 | <0.001 |
| G6PC          | <0.001 | 0.412 | 0.255~0.664 | <0.001 |
| SEN3-EIF4A1   | <0.001 | 5.498 | 3.564~8.484 | <0.001 |
| SNRPGP10      | <0.001 | 1.339 | 1.257~1.425 | <0.001 |
| FBXO4         | <0.001 | 1.546 | 1.377~1.736 | <0.001 |
| UBE2S         | <0.001 | 1.426 | 1.324~1.537 | <0.001 |
| C19orf69      | <0.001 | 2.410 | 1.823~3.188 | <0.001 |
| SLC16A9       | <0.001 | 0.733 | 0.676~0.794 | <0.001 |
| BST2          | <0.001 | 1.280 | 1.207~1.359 | <0.001 |
| CLEC4F        | <0.001 | 0.550 | 0.482~0.627 | <0.001 |
| PMVK          | <0.001 | 0.741 | 0.687~0.799 | <0.001 |
| C6orf141      | <0.001 | 1.353 | 1.281~1.428 | <0.001 |
| GADD45B       | <0.001 | 1.216 | 1.146~1.291 | <0.001 |
| ARRDC3        | <0.001 | 1.569 | 1.436~1.715 | <0.001 |
| GOLGA6L2      | <0.001 | 0.619 | 0.517~0.740 | <0.001 |
| SAMSN1        | <0.001 | 1.306 | 1.212~1.407 | <0.001 |
| RFWD3         | <0.001 | 1.835 | 1.634~2.061 | <0.001 |
| LINC00870     | <0.001 | 0.169 | 0.104~0.274 | <0.001 |
| G6PC2         | <0.001 | 0.428 | 0.321~0.570 | <0.001 |
| PIGT          | <0.001 | 1.431 | 1.305~1.569 | <0.001 |
| AC006262.6    | <0.001 | 0.674 | 0.597~0.760 | <0.001 |
| RTBDN         | <0.001 | 0.780 | 0.722~0.843 | <0.001 |
| TOM1L1        | <0.001 | 1.393 | 1.289~1.504 | <0.001 |
| KCNJ12        | <0.001 | 0.569 | 0.478~0.676 | <0.001 |
| RP11-355I22.7 | <0.001 | 0.772 | 0.723~0.825 | <0.001 |
| WDR41         | <0.001 | 1.684 | 1.481~1.916 | <0.001 |
| ZFR2          | <0.001 | 0.762 | 0.716~0.812 | <0.001 |
| CDK13         | <0.001 | 2.002 | 1.725~2.324 | <0.001 |
| SEC13         | <0.001 | 1.621 | 1.433~1.833 | <0.001 |
| LEPREL4       | <0.001 | 1.529 | 1.372~1.704 | <0.001 |
| CARD6         | <0.001 | 1.768 | 1.534~2.037 | <0.001 |
| LBH           | <0.001 | 1.335 | 1.243~1.433 | <0.001 |
| PKMP3         | <0.001 | 0.689 | 0.626~0.759 | <0.001 |
| FAM115D       | <0.001 | 1.867 | 1.550~2.249 | <0.001 |
| CCDC122       | <0.001 | 1.840 | 1.589~2.130 | <0.001 |
| DYNLT3        | <0.001 | 1.236 | 1.158~1.319 | <0.001 |
| SLC17A7       | <0.001 | 0.871 | 0.840~0.903 | <0.001 |
| REEP2         | <0.001 | 0.686 | 0.634~0.743 | <0.001 |
| RP11-674P19.2 | <0.001 | 6.348 | 4.041~9.972 | <0.001 |
| ZNF574        | <0.001 | 1.767 | 1.527~2.043 | <0.001 |
| SLC15A4       | <0.001 | 1.887 | 1.652~2.155 | <0.001 |
| RP1-269M15.3  | <0.001 | 0.553 | 0.458~0.668 | <0.001 |
| DCAF15        | <0.001 | 1.624 | 1.453~1.816 | <0.001 |
| POLD1         | <0.001 | 1.280 | 1.200~1.366 | <0.001 |
| OLFM1         | <0.001 | 0.827 | 0.789~0.866 | <0.001 |
| LYST          | <0.001 | 1.627 | 1.474~1.796 | <0.001 |
| TRPV4         | <0.001 | 1.496 | 1.339~1.673 | <0.001 |
| GGCT          | <0.001 | 1.293 | 1.182~1.413 | <0.001 |

|               |        |       |             |        |
|---------------|--------|-------|-------------|--------|
| CRYZL1        | <0.001 | 0.730 | 0.660~0.808 | <0.001 |
| KIAA1009      | <0.001 | 1.899 | 1.650~2.185 | <0.001 |
| UBE2QL1       | <0.001 | 0.712 | 0.661~0.767 | <0.001 |
| C10orf85      | <0.001 | 0.603 | 0.536~0.679 | <0.001 |
| DRD5          | <0.001 | 0.427 | 0.328~0.555 | <0.001 |
| GBGT1         | <0.001 | 1.486 | 1.338~1.651 | <0.001 |
| SHROOM3       | <0.001 | 1.485 | 1.360~1.621 | <0.001 |
| IKBKE         | <0.001 | 1.640 | 1.464~1.838 | <0.001 |
| SDHA          | <0.001 | 0.769 | 0.713~0.829 | <0.001 |
| RELB          | <0.001 | 1.420 | 1.309~1.540 | <0.001 |
| TRIO          | <0.001 | 1.360 | 1.272~1.454 | <0.001 |
| IRF2          | <0.001 | 1.632 | 1.460~1.824 | <0.001 |
| HS3ST4        | <0.001 | 0.701 | 0.640~0.768 | <0.001 |
| ABCD1         | <0.001 | 1.564 | 1.407~1.739 | <0.001 |
| PRF1          | <0.001 | 1.408 | 1.307~1.516 | <0.001 |
| PHYKPL        | <0.001 | 1.722 | 1.531~1.936 | <0.001 |
| RP11-368I7.4  | <0.001 | 2.388 | 1.949~2.928 | <0.001 |
| FGFR1OP       | <0.001 | 1.860 | 1.633~2.119 | <0.001 |
| SNTB2         | <0.001 | 1.778 | 1.582~1.998 | <0.001 |
| TNFSF15       | <0.001 | 1.910 | 1.477~2.472 | <0.001 |
| TMEM147       | <0.001 | 1.358 | 1.250~1.476 | <0.001 |
| MET           | <0.001 | 1.284 | 1.210~1.362 | <0.001 |
| CTD-2619J13.8 | <0.001 | 1.438 | 1.284~1.609 | <0.001 |
| TNFRSF10C     | <0.001 | 1.391 | 1.266~1.528 | <0.001 |
| CTBP2P8       | <0.001 | 1.893 | 1.538~2.330 | <0.001 |
| SPG21         | <0.001 | 1.864 | 1.601~2.170 | <0.001 |
| TLR1          | <0.001 | 1.491 | 1.367~1.627 | <0.001 |
| FBXO43        | <0.001 | 1.879 | 1.582~2.232 | <0.001 |
| CTD-2035E11.4 | <0.001 | 1.515 | 1.394~1.645 | <0.001 |
| SLITRK1       | <0.001 | 0.677 | 0.619~0.740 | <0.001 |
| SSTR5-AS1     | <0.001 | 0.322 | 0.172~0.606 | <0.001 |
| IGLC3         | <0.001 | 1.134 | 1.099~1.170 | <0.001 |
| TBCCD1        | <0.001 | 1.862 | 1.622~2.137 | <0.001 |
| MIER1         | <0.001 | 1.826 | 1.604~2.079 | <0.001 |
| DNMT3B        | <0.001 | 2.704 | 2.270~3.220 | <0.001 |
| SLC39A7       | <0.001 | 1.587 | 1.416~1.780 | <0.001 |
| FAAH          | <0.001 | 0.772 | 0.726~0.820 | <0.001 |
| MAK           | <0.001 | 1.933 | 1.602~2.334 | <0.001 |
| MDK           | <0.001 | 1.236 | 1.171~1.305 | <0.001 |
| WASF2         | <0.001 | 1.613 | 1.450~1.794 | <0.001 |
| OSM           | <0.001 | 1.255 | 1.185~1.330 | <0.001 |
| RP11-295D4.1  | <0.001 | 2.128 | 1.775~2.551 | <0.001 |
| TDO2          | <0.001 | 1.400 | 1.302~1.505 | <0.001 |
| FRY           | <0.001 | 0.710 | 0.655~0.770 | <0.001 |
| CUL7          | <0.001 | 1.804 | 1.600~2.033 | <0.001 |
| UBALD2        | <0.001 | 1.326 | 1.239~1.420 | <0.001 |
| PMS2P1        | <0.001 | 1.707 | 1.498~1.946 | <0.001 |
| PGK1          | <0.001 | 1.393 | 1.288~1.507 | <0.001 |
| SPTBN2        | <0.001 | 0.761 | 0.717~0.808 | <0.001 |
| FOXO4         | <0.001 | 0.595 | 0.527~0.671 | <0.001 |
| HOXB3         | <0.001 | 1.334 | 1.270~1.401 | <0.001 |
| MYT1          | <0.001 | 0.722 | 0.677~0.771 | <0.001 |

|               |        |       |             |        |
|---------------|--------|-------|-------------|--------|
| RP11-430C7.5  | <0.001 | 1.594 | 1.397~1.817 | <0.001 |
| UPK2          | <0.001 | 0.641 | 0.570~0.720 | <0.001 |
| HSPB1         | <0.001 | 1.186 | 1.130~1.244 | <0.001 |
| RP11-493K23.4 | <0.001 | 0.595 | 0.502~0.704 | <0.001 |
| FANCF         | <0.001 | 1.794 | 1.543~2.086 | <0.001 |
| ALG14         | <0.001 | 1.658 | 1.463~1.880 | <0.001 |
| RUNX2         | <0.001 | 1.509 | 1.377~1.652 | <0.001 |
| RP11-119F19.2 | <0.001 | 0.695 | 0.628~0.769 | <0.001 |
| PPFIA2        | <0.001 | 0.724 | 0.671~0.780 | <0.001 |
| TMED5         | <0.001 | 1.494 | 1.361~1.639 | <0.001 |
| HSD11B1L      | <0.001 | 0.723 | 0.667~0.783 | <0.001 |
| EGFLAM        | <0.001 | 1.456 | 1.334~1.590 | <0.001 |
| TAF13         | <0.001 | 1.749 | 1.544~1.981 | <0.001 |
| NES           | <0.001 | 1.344 | 1.249~1.447 | <0.001 |
| L3HYPDH       | <0.001 | 1.444 | 1.316~1.586 | <0.001 |
| AIFM3         | <0.001 | 0.827 | 0.785~0.870 | <0.001 |
| KDELC1        | <0.001 | 1.629 | 1.452~1.827 | <0.001 |
| CTNNAL1       | <0.001 | 1.465 | 1.323~1.622 | <0.001 |
| HAVCR2        | <0.001 | 1.455 | 1.337~1.585 | <0.001 |
| SFTPC         | <0.001 | 0.759 | 0.709~0.813 | <0.001 |
| CTD-2008P7.1  | <0.001 | 0.032 | 0.013~0.081 | <0.001 |
| CTD-2636A23.2 | <0.001 | 0.692 | 0.637~0.752 | <0.001 |
| C15orf65      | <0.001 | 1.567 | 1.395~1.761 | <0.001 |
| STAT3         | <0.001 | 1.757 | 1.584~1.949 | <0.001 |
| MGAT2         | <0.001 | 1.588 | 1.429~1.766 | <0.001 |
| OLFML1        | <0.001 | 1.468 | 1.326~1.626 | <0.001 |
| MTCH2         | <0.001 | 1.459 | 1.279~1.663 | <0.001 |
| RP11-173M1.8  | <0.001 | 2.135 | 1.791~2.545 | <0.001 |
| CD53          | <0.001 | 1.310 | 1.223~1.402 | <0.001 |
| GRAP          | <0.001 | 1.557 | 1.403~1.728 | <0.001 |
| SNORD3B-1     | <0.001 | 1.167 | 1.115~1.221 | <0.001 |
| FCHSD2        | <0.001 | 0.696 | 0.640~0.758 | <0.001 |
| SS18          | <0.001 | 1.470 | 1.351~1.599 | <0.001 |
| TARBP2        | <0.001 | 1.783 | 1.567~2.029 | <0.001 |
| STXBP1        | <0.001 | 0.777 | 0.730~0.826 | <0.001 |
| METTL1        | <0.001 | 1.305 | 1.232~1.382 | <0.001 |
| MCOLN2        | <0.001 | 1.552 | 1.376~1.751 | <0.001 |
| LAMB2         | <0.001 | 1.255 | 1.181~1.334 | <0.001 |
| CBR1          | <0.001 | 1.201 | 1.132~1.274 | <0.001 |
| OSR1          | <0.001 | 1.328 | 1.239~1.423 | <0.001 |
| USP2          | <0.001 | 0.745 | 0.683~0.813 | <0.001 |
| ADAMTS19      | <0.001 | 0.591 | 0.495~0.706 | <0.001 |
| ZNF607        | <0.001 | 1.904 | 1.595~2.272 | <0.001 |
| LOXL1-AS1     | <0.001 | 1.780 | 1.598~1.981 | <0.001 |
| FRRS1L        | <0.001 | 0.697 | 0.644~0.755 | <0.001 |
| SST           | <0.001 | 0.860 | 0.827~0.894 | <0.001 |
| AC092162.1    | <0.001 | 0.195 | 0.109~0.349 | <0.001 |
| VAT1          | <0.001 | 1.316 | 1.216~1.425 | <0.001 |
| AC093673.5    | <0.001 | 1.403 | 1.295~1.519 | <0.001 |
| ALG3          | <0.001 | 1.753 | 1.537~2.000 | <0.001 |
| SLC24A3       | <0.001 | 0.707 | 0.655~0.763 | <0.001 |
| PNMA3         | <0.001 | 0.723 | 0.674~0.775 | <0.001 |

|               |        |       |             |        |
|---------------|--------|-------|-------------|--------|
| ORC5          | <0.001 | 1.850 | 1.559~2.195 | <0.001 |
| MRPL42        | <0.001 | 1.481 | 1.355~1.619 | <0.001 |
| DCBLD1        | <0.001 | 1.829 | 1.620~2.064 | <0.001 |
| APOL2         | <0.001 | 1.483 | 1.345~1.636 | <0.001 |
| MTMR7         | <0.001 | 0.648 | 0.586~0.716 | <0.001 |
| EXT1          | <0.001 | 1.633 | 1.459~1.828 | <0.001 |
| PGR           | <0.001 | 0.294 | 0.186~0.463 | <0.001 |
| ADCY3         | <0.001 | 1.466 | 1.299~1.655 | <0.001 |
| PTCD1         | <0.001 | 1.939 | 1.635~2.299 | <0.001 |
| CTC-336P14.1  | <0.001 | 0.725 | 0.668~0.787 | <0.001 |
| MMP24         | <0.001 | 0.713 | 0.657~0.774 | <0.001 |
| RFC3          | <0.001 | 1.547 | 1.403~1.706 | <0.001 |
| TMEM237       | <0.001 | 1.547 | 1.379~1.735 | <0.001 |
| IL15          | <0.001 | 1.567 | 1.398~1.756 | <0.001 |
| SMPD4         | <0.001 | 1.523 | 1.359~1.708 | <0.001 |
| RP4-740C4.8   | <0.001 | 1.846 | 1.598~2.132 | <0.001 |
| FAM122B       | <0.001 | 1.458 | 1.312~1.619 | <0.001 |
| SLC18A2       | <0.001 | 0.607 | 0.527~0.699 | <0.001 |
| RECQL         | <0.001 | 1.455 | 1.341~1.578 | <0.001 |
| ACVR1C        | <0.001 | 0.426 | 0.336~0.541 | <0.001 |
| LMO4          | <0.001 | 1.358 | 1.260~1.463 | <0.001 |
| IKBKB         | <0.001 | 1.600 | 1.387~1.845 | <0.001 |
| FAM3D         | <0.001 | 2.155 | 1.762~2.635 | <0.001 |
| FHAD1         | <0.001 | 1.456 | 1.333~1.591 | <0.001 |
| FAXC          | <0.001 | 0.756 | 0.704~0.812 | <0.001 |
| SEZ6          | <0.001 | 0.756 | 0.714~0.801 | <0.001 |
| AC004019.13   | <0.001 | 0.498 | 0.424~0.585 | <0.001 |
| CELSR3        | <0.001 | 0.715 | 0.659~0.777 | <0.001 |
| UPP1          | <0.001 | 1.254 | 1.185~1.328 | <0.001 |
| VAT1L         | <0.001 | 0.773 | 0.729~0.819 | <0.001 |
| TMEM59        | <0.001 | 1.365 | 1.241~1.502 | <0.001 |
| SIK3          | <0.001 | 0.692 | 0.621~0.771 | <0.001 |
| FAM120A       | <0.001 | 1.912 | 1.645~2.223 | <0.001 |
| SOCS1         | <0.001 | 1.458 | 1.347~1.578 | <0.001 |
| DHX15         | <0.001 | 1.573 | 1.409~1.758 | <0.001 |
| CXCR4         | <0.001 | 1.329 | 1.245~1.420 | <0.001 |
| PTGS1         | <0.001 | 1.486 | 1.364~1.619 | <0.001 |
| GLB1L         | <0.001 | 1.728 | 1.533~1.948 | <0.001 |
| ABHD6         | <0.001 | 0.741 | 0.680~0.808 | <0.001 |
| TMEM39A       | <0.001 | 1.800 | 1.604~2.020 | <0.001 |
| FAM96A        | <0.001 | 1.328 | 1.222~1.444 | <0.001 |
| LY96          | <0.001 | 1.324 | 1.246~1.408 | <0.001 |
| CFL1P1        | <0.001 | 0.663 | 0.595~0.738 | <0.001 |
| ARL13B        | <0.001 | 1.706 | 1.520~1.914 | <0.001 |
| MYO7A         | <0.001 | 1.473 | 1.351~1.606 | <0.001 |
| LCAT          | <0.001 | 0.815 | 0.771~0.861 | <0.001 |
| ALPK1         | <0.001 | 1.550 | 1.400~1.716 | <0.001 |
| CA9           | <0.001 | 1.243 | 1.191~1.297 | <0.001 |
| CTD-2306M10.1 | <0.001 | 2.070 | 1.705~2.514 | <0.001 |
| RASSF3        | <0.001 | 1.532 | 1.371~1.713 | <0.001 |
| RIC8A         | <0.001 | 1.450 | 1.323~1.590 | <0.001 |
| CTC-203F4.2   | <0.001 | 0.586 | 0.515~0.665 | <0.001 |

|               |        |       |             |        |
|---------------|--------|-------|-------------|--------|
| PDS5A         | <0.001 | 1.897 | 1.640~2.195 | <0.001 |
| CENPM         | <0.001 | 1.343 | 1.256~1.436 | <0.001 |
| APOL6         | <0.001 | 1.555 | 1.403~1.724 | <0.001 |
| TMEFF2        | <0.001 | 0.764 | 0.719~0.811 | <0.001 |
| SMURF1        | <0.001 | 1.851 | 1.598~2.144 | <0.001 |
| TLX1NB        | <0.001 | 0.397 | 0.322~0.489 | <0.001 |
| ZNF324B       | <0.001 | 2.004 | 1.730~2.322 | <0.001 |
| FBLL1         | <0.001 | 0.770 | 0.730~0.813 | <0.001 |
| DTYMK         | <0.001 | 1.353 | 1.244~1.472 | <0.001 |
| CYP2S1        | <0.001 | 2.005 | 1.727~2.328 | <0.001 |
| C1GALT1C1     | <0.001 | 1.548 | 1.370~1.749 | <0.001 |
| MYL6          | <0.001 | 1.363 | 1.258~1.476 | <0.001 |
| RP11-46D6.1   | <0.001 | 1.731 | 1.543~1.943 | <0.001 |
| CYB561        | <0.001 | 1.401 | 1.279~1.535 | <0.001 |
| AC131056.3    | <0.001 | 0.669 | 0.608~0.736 | <0.001 |
| RP11-338N10.1 | <0.001 | 0.648 | 0.570~0.738 | <0.001 |
| NUP98         | <0.001 | 1.687 | 1.476~1.927 | <0.001 |
| HNRNPUL1      | <0.001 | 1.554 | 1.397~1.728 | <0.001 |
| SNX7          | <0.001 | 1.371 | 1.243~1.511 | <0.001 |
| IL7R          | <0.001 | 1.338 | 1.217~1.470 | <0.001 |
| RP11-326I11.3 | <0.001 | 1.727 | 1.502~1.986 | <0.001 |
| RP1-40E16.9   | <0.001 | 2.437 | 2.052~2.894 | <0.001 |
| SYCE2         | <0.001 | 0.690 | 0.626~0.760 | <0.001 |
| PARK2         | <0.001 | 0.478 | 0.404~0.567 | <0.001 |
| PRNP          | <0.001 | 0.775 | 0.725~0.828 | <0.001 |
| SLC38A6       | <0.001 | 1.829 | 1.603~2.087 | <0.001 |
| UBA2          | <0.001 | 1.639 | 1.466~1.833 | <0.001 |
| CYSTM1        | <0.001 | 1.388 | 1.271~1.515 | <0.001 |
| FAM87B        | <0.001 | 3.194 | 2.315~4.405 | <0.001 |
| ZNF587B       | <0.001 | 1.521 | 1.361~1.700 | <0.001 |
| LA16c-329F2.1 | <0.001 | 0.701 | 0.631~0.779 | <0.001 |
| SIMC1         | <0.001 | 1.478 | 1.342~1.628 | <0.001 |
| MANEA         | <0.001 | 1.599 | 1.418~1.803 | <0.001 |
| CLPTM1L       | <0.001 | 1.611 | 1.417~1.831 | <0.001 |
| PLA2G4A       | <0.001 | 1.766 | 1.584~1.968 | <0.001 |
| SPINT1        | <0.001 | 1.476 | 1.320~1.649 | <0.001 |
| RP11-1277A3.1 | <0.001 | 1.866 | 1.619~2.150 | <0.001 |
| NLN           | <0.001 | 1.655 | 1.459~1.877 | <0.001 |
| RGS11         | <0.001 | 0.784 | 0.742~0.828 | <0.001 |
| RP11-238F2.1  | <0.001 | 0.651 | 0.571~0.743 | <0.001 |
| FAM196B       | <0.001 | 0.460 | 0.391~0.541 | <0.001 |
| WDR34         | <0.001 | 1.373 | 1.269~1.485 | <0.001 |
| MVD           | <0.001 | 0.671 | 0.617~0.730 | <0.001 |
| RMI2          | <0.001 | 1.477 | 1.349~1.617 | <0.001 |
| RP11-932O9.10 | <0.001 | 2.411 | 2.023~2.874 | <0.001 |
| ZNF518B       | <0.001 | 1.616 | 1.456~1.794 | <0.001 |
| RASEF         | <0.001 | 1.500 | 1.332~1.689 | <0.001 |
| LA16c-380A1.1 | <0.001 | 0.706 | 0.647~0.770 | <0.001 |
| ZNF765        | <0.001 | 1.792 | 1.562~2.056 | <0.001 |
| NUDT16P       | <0.001 | 2.408 | 1.958~2.963 | <0.001 |
| RNF130        | <0.001 | 1.452 | 1.302~1.619 | <0.001 |
| OLIG2         | <0.001 | 0.827 | 0.790~0.866 | <0.001 |

|               |        |       |              |        |
|---------------|--------|-------|--------------|--------|
| PRPF4         | <0.001 | 1.913 | 1.662~2.203  | <0.001 |
| FAM221A       | <0.001 | 1.358 | 1.247~1.479  | <0.001 |
| RP11-128A17.1 | <0.001 | 0.662 | 0.599~0.732  | <0.001 |
| CDC7          | <0.001 | 1.512 | 1.383~1.653  | <0.001 |
| LDOC1         | <0.001 | 0.842 | 0.800~0.887  | <0.001 |
| DOCK3         | <0.001 | 0.627 | 0.568~0.693  | <0.001 |
| PDLIM7        | <0.001 | 1.417 | 1.318~1.524  | <0.001 |
| H2AFX         | <0.001 | 1.607 | 1.456~1.772  | <0.001 |
| BATF          | <0.001 | 1.351 | 1.258~1.451  | <0.001 |
| SYT13         | <0.001 | 0.773 | 0.726~0.823  | <0.001 |
| SP7           | <0.001 | 0.336 | 0.203~0.554  | <0.001 |
| TRIM14        | <0.001 | 1.520 | 1.377~1.678  | <0.001 |
| FBXO46        | <0.001 | 1.841 | 1.622~2.089  | <0.001 |
| LACTB         | <0.001 | 1.803 | 1.586~2.050  | <0.001 |
| GRIA2         | <0.001 | 0.781 | 0.742~0.823  | <0.001 |
| ACBD4         | <0.001 | 0.664 | 0.607~0.726  | <0.001 |
| IL1RAP        | <0.001 | 1.370 | 1.287~1.457  | <0.001 |
| RP11-288H12.4 | <0.001 | 2.297 | 1.844~2.862  | <0.001 |
| PVRL1         | <0.001 | 0.714 | 0.655~0.778  | <0.001 |
| NBPF1         | <0.001 | 1.613 | 1.449~1.795  | <0.001 |
| PRMT8         | <0.001 | 0.713 | 0.653~0.778  | <0.001 |
| UBE2A         | <0.001 | 1.416 | 1.288~1.557  | <0.001 |
| PCDH11X       | <0.001 | 0.619 | 0.535~0.717  | <0.001 |
| CHRM4         | <0.001 | 0.604 | 0.532~0.687  | <0.001 |
| RP11-121A8.1  | <0.001 | 7.257 | 4.605~11.436 | <0.001 |
| AC005264.2    | <0.001 | 2.003 | 1.391~2.884  | <0.001 |
| ZNF419        | <0.001 | 1.684 | 1.481~1.914  | <0.001 |
| SNRPG         | <0.001 | 1.333 | 1.232~1.442  | <0.001 |
| CLVS2         | <0.001 | 0.601 | 0.536~0.675  | <0.001 |
| EPHA1         | <0.001 | 1.541 | 1.384~1.716  | <0.001 |
| PDCD5         | <0.001 | 1.329 | 1.234~1.431  | <0.001 |
| AC098614.2    | <0.001 | 1.723 | 1.537~1.932  | <0.001 |
| LRRC8A        | <0.001 | 0.726 | 0.671~0.786  | <0.001 |
| ECE2          | <0.001 | 0.717 | 0.656~0.783  | <0.001 |
| EHD3          | <0.001 | 0.694 | 0.638~0.756  | <0.001 |
| ZNF566        | <0.001 | 1.828 | 1.597~2.092  | <0.001 |
| STAT5A        | <0.001 | 1.485 | 1.356~1.626  | <0.001 |
| RPH3A         | <0.001 | 0.782 | 0.740~0.826  | <0.001 |
| RP11-540A21.2 | <0.001 | 1.974 | 1.397~2.788  | <0.001 |
| DPP4          | <0.001 | 1.405 | 1.302~1.516  | <0.001 |
| RP11-4B14.3   | <0.001 | 0.628 | 0.549~0.719  | <0.001 |
| TMEM37        | <0.001 | 1.545 | 1.390~1.717  | <0.001 |
| B3GAT1        | <0.001 | 0.759 | 0.712~0.810  | <0.001 |
| NKAIN4        | <0.001 | 0.841 | 0.807~0.876  | <0.001 |
| AUNIP         | <0.001 | 2.307 | 1.944~2.736  | <0.001 |
| SLC6A1        | <0.001 | 0.741 | 0.698~0.786  | <0.001 |
| IGLC2         | <0.001 | 1.150 | 1.111~1.190  | <0.001 |
| CPQ           | <0.001 | 1.403 | 1.296~1.519  | <0.001 |
| KCTD9         | <0.001 | 1.608 | 1.451~1.782  | <0.001 |
| RP4-781K5.8   | <0.001 | 2.794 | 2.083~3.748  | <0.001 |
| MAP3K14       | <0.001 | 1.686 | 1.507~1.886  | <0.001 |
| RP11-168O16.1 | <0.001 | 0.606 | 0.490~0.749  | <0.001 |

|                |        |       |             |        |
|----------------|--------|-------|-------------|--------|
| SMCR5          | <0.001 | 0.077 | 0.042~0.142 | <0.001 |
| COPG1          | <0.001 | 1.577 | 1.406~1.767 | <0.001 |
| PPP2R2C        | <0.001 | 0.795 | 0.756~0.837 | <0.001 |
| NDUFAF7        | <0.001 | 1.766 | 1.504~2.073 | <0.001 |
| MOB3C          | <0.001 | 1.751 | 1.545~1.984 | <0.001 |
| XG             | <0.001 | 1.475 | 1.242~1.751 | <0.001 |
| MAPK3          | <0.001 | 0.730 | 0.667~0.800 | <0.001 |
| STAT2          | <0.001 | 1.527 | 1.380~1.691 | <0.001 |
| PTPN1          | <0.001 | 1.681 | 1.499~1.885 | <0.001 |
| SIDT1          | <0.001 | 0.658 | 0.592~0.730 | <0.001 |
| GLE1           | <0.001 | 2.024 | 1.728~2.370 | <0.001 |
| B3GNT8         | <0.001 | 1.625 | 1.425~1.854 | <0.001 |
| LYNX1          | <0.001 | 0.691 | 0.637~0.748 | <0.001 |
| TOR1A          | <0.001 | 1.686 | 1.476~1.926 | <0.001 |
| TMEM130        | <0.001 | 0.823 | 0.785~0.862 | <0.001 |
| UBE3C          | <0.001 | 1.822 | 1.597~2.079 | <0.001 |
| NKX2-5         | <0.001 | 1.337 | 1.261~1.418 | <0.001 |
| PTP4A3         | <0.001 | 1.360 | 1.260~1.469 | <0.001 |
| AC096559.1     | <0.001 | 1.460 | 1.320~1.615 | <0.001 |
| RP3-393E18.2   | <0.001 | 2.308 | 1.880~2.835 | <0.001 |
| NELL1          | <0.001 | 0.686 | 0.626~0.752 | <0.001 |
| PCED1B         | <0.001 | 1.606 | 1.443~1.788 | <0.001 |
| FNDC5          | <0.001 | 0.759 | 0.702~0.819 | <0.001 |
| TMEM150B       | <0.001 | 1.613 | 1.419~1.834 | <0.001 |
| OGDHL          | <0.001 | 0.749 | 0.699~0.803 | <0.001 |
| CCDC64         | <0.001 | 0.751 | 0.697~0.810 | <0.001 |
| ANKRD22        | <0.001 | 1.355 | 1.250~1.469 | <0.001 |
| RNF112         | <0.001 | 0.720 | 0.666~0.777 | <0.001 |
| WDR86-AS1      | <0.001 | 0.459 | 0.373~0.564 | <0.001 |
| MEST           | <0.001 | 1.337 | 1.249~1.432 | <0.001 |
| MAL2           | <0.001 | 0.777 | 0.723~0.834 | <0.001 |
| SLC35F3        | <0.001 | 0.641 | 0.564~0.729 | <0.001 |
| PLIN3          | <0.001 | 1.557 | 1.418~1.709 | <0.001 |
| TMEM180        | <0.001 | 0.656 | 0.587~0.733 | <0.001 |
| AP1M1          | <0.001 | 1.521 | 1.331~1.737 | <0.001 |
| TBC1D10A       | <0.001 | 0.659 | 0.603~0.720 | <0.001 |
| NXT1           | <0.001 | 1.472 | 1.334~1.624 | <0.001 |
| RP11-229P13.25 | <0.001 | 2.756 | 2.198~3.457 | <0.001 |
| ALOX5AP        | <0.001 | 1.291 | 1.224~1.361 | <0.001 |
| FGR            | <0.001 | 1.505 | 1.372~1.651 | <0.001 |
| AKR1B10        | <0.001 | 1.700 | 1.421~2.034 | <0.001 |
| WDR92          | <0.001 | 1.682 | 1.488~1.901 | <0.001 |
| RHBDL1         | <0.001 | 0.751 | 0.705~0.801 | <0.001 |
| HGD            | <0.001 | 1.597 | 1.404~1.816 | <0.001 |
| LETMD1         | <0.001 | 0.720 | 0.662~0.783 | <0.001 |
| EBF3           | <0.001 | 1.665 | 1.491~1.859 | <0.001 |
| CD80           | <0.001 | 1.902 | 1.541~2.347 | <0.001 |
| LCN12          | <0.001 | 0.778 | 0.729~0.830 | <0.001 |
| LYN            | <0.001 | 1.511 | 1.385~1.649 | <0.001 |
| MSTO1          | <0.001 | 1.647 | 1.462~1.855 | <0.001 |
| TRAF3IP3       | <0.001 | 1.415 | 1.285~1.558 | <0.001 |
| ZNF284         | <0.001 | 2.723 | 2.186~3.393 | <0.001 |



|               |        |       |             |        |
|---------------|--------|-------|-------------|--------|
| LSM12         | <0.001 | 1.573 | 1.408~1.757 | <0.001 |
| IL1R1         | <0.001 | 1.352 | 1.257~1.453 | <0.001 |
| FAM159B       | <0.001 | 0.486 | 0.414~0.571 | <0.001 |
| GPR98         | <0.001 | 0.754 | 0.708~0.803 | <0.001 |
| LZTS1         | <0.001 | 1.400 | 1.302~1.505 | <0.001 |
| CTTN          | <0.001 | 1.744 | 1.511~2.014 | <0.001 |
| RHOH          | <0.001 | 1.485 | 1.329~1.658 | <0.001 |
| PTPN2         | <0.001 | 1.643 | 1.462~1.847 | <0.001 |
| AGBL2         | <0.001 | 1.471 | 1.351~1.602 | <0.001 |
| CNTN6         | <0.001 | 0.459 | 0.379~0.555 | <0.001 |
| GDAP1         | <0.001 | 0.713 | 0.661~0.770 | <0.001 |
| HP1BP3        | <0.001 | 1.513 | 1.381~1.657 | <0.001 |
| ADRBK2        | <0.001 | 0.561 | 0.493~0.639 | <0.001 |
| RP11-490M8.1  | <0.001 | 0.817 | 0.771~0.866 | <0.001 |
| BFAR          | <0.001 | 1.782 | 1.539~2.063 | <0.001 |
| SLC37A2       | <0.001 | 1.544 | 1.400~1.702 | <0.001 |
| SQSTM1        | <0.001 | 1.539 | 1.381~1.715 | <0.001 |
| HAMP          | <0.001 | 1.184 | 1.134~1.237 | <0.001 |
| KCNB2         | <0.001 | 0.509 | 0.404~0.642 | <0.001 |
| TRDC          | <0.001 | 1.319 | 1.253~1.389 | <0.001 |
| C16orf86      | <0.001 | 0.655 | 0.596~0.721 | <0.001 |
| KCNK7         | <0.001 | 0.746 | 0.699~0.797 | <0.001 |
| GPR1          | <0.001 | 1.452 | 1.310~1.610 | <0.001 |
| IER5L         | <0.001 | 1.358 | 1.266~1.458 | <0.001 |
| PLEKHG1       | <0.001 | 1.630 | 1.466~1.811 | <0.001 |
| ST7L          | <0.001 | 1.856 | 1.592~2.164 | <0.001 |
| IL17B         | <0.001 | 1.411 | 1.296~1.536 | <0.001 |
| LSM10         | <0.001 | 1.468 | 1.345~1.602 | <0.001 |
| SEC31B        | <0.001 | 0.736 | 0.682~0.795 | <0.001 |
| TCF3          | <0.001 | 1.462 | 1.336~1.600 | <0.001 |
| CD4           | <0.001 | 1.407 | 1.298~1.526 | <0.001 |
| UBE2D3        | <0.001 | 1.420 | 1.278~1.579 | <0.001 |
| SULF1         | <0.001 | 1.262 | 1.196~1.332 | <0.001 |
| LINC00403     | <0.001 | 0.729 | 0.676~0.787 | <0.001 |
| SYT14         | <0.001 | 0.444 | 0.367~0.538 | <0.001 |
| EXOSC3        | <0.001 | 1.668 | 1.492~1.864 | <0.001 |
| TMEM87B       | <0.001 | 2.167 | 1.861~2.524 | <0.001 |
| IGHG1         | <0.001 | 1.121 | 1.091~1.151 | <0.001 |
| PRRX2         | <0.001 | 1.418 | 1.307~1.538 | <0.001 |
| DSE           | <0.001 | 1.533 | 1.399~1.680 | <0.001 |
| GPR4          | <0.001 | 1.600 | 1.437~1.783 | <0.001 |
| MAEA          | <0.001 | 1.885 | 1.603~2.217 | <0.001 |
| KMO           | <0.001 | 1.681 | 1.485~1.902 | <0.001 |
| CTD-3092A11.2 | <0.001 | 1.713 | 1.536~1.911 | <0.001 |
| TMEM100       | <0.001 | 0.835 | 0.796~0.875 | <0.001 |
| HOGA1         | <0.001 | 0.648 | 0.585~0.718 | <0.001 |
| UXS1          | <0.001 | 1.906 | 1.653~2.197 | <0.001 |
| IFIH1         | <0.001 | 1.588 | 1.447~1.744 | <0.001 |
| PNKP          | <0.001 | 1.551 | 1.402~1.715 | <0.001 |
| MEAF6         | <0.001 | 1.569 | 1.403~1.754 | <0.001 |
| DHH           | <0.001 | 1.544 | 1.356~1.758 | <0.001 |
| EPS8          | <0.001 | 1.511 | 1.361~1.678 | <0.001 |

|               |        |       |             |        |
|---------------|--------|-------|-------------|--------|
| RP11-116O18.1 | <0.001 | 0.428 | 0.350~0.523 | <0.001 |
| EVA1B         | <0.001 | 1.310 | 1.233~1.392 | <0.001 |
| GLIPR1        | <0.001 | 1.433 | 1.331~1.543 | <0.001 |
| HIC1          | <0.001 | 1.547 | 1.403~1.706 | <0.001 |
| LRFN5         | <0.001 | 0.684 | 0.617~0.759 | <0.001 |
| LY6H          | <0.001 | 0.848 | 0.817~0.881 | <0.001 |
| MCM5          | <0.001 | 1.706 | 1.532~1.901 | <0.001 |
| NR2F2         | <0.001 | 1.400 | 1.305~1.502 | <0.001 |
| CTD-2171N6.1  | <0.001 | 3.062 | 2.254~4.160 | <0.001 |
| ADCK1         | <0.001 | 0.679 | 0.611~0.755 | <0.001 |
| ATP5F1P5      | <0.001 | 1.992 | 1.680~2.362 | <0.001 |
| ALDH3B1       | <0.001 | 1.553 | 1.400~1.724 | <0.001 |
| ZNF585B       | <0.001 | 1.790 | 1.575~2.034 | <0.001 |
| BMP8B         | <0.001 | 1.450 | 1.336~1.572 | <0.001 |
| RP11-23P13.7  | <0.001 | 1.329 | 1.218~1.450 | <0.001 |
| RP11-179B2.2  | <0.001 | 0.379 | 0.293~0.489 | <0.001 |
| DPM1          | <0.001 | 1.338 | 1.221~1.466 | <0.001 |
| MYOM1         | <0.001 | 0.633 | 0.569~0.704 | <0.001 |
| RP11-527D7.1  | <0.001 | 0.697 | 0.629~0.773 | <0.001 |
| TUBA1B        | <0.001 | 1.371 | 1.263~1.487 | <0.001 |
| MADCAM1       | <0.001 | 0.658 | 0.597~0.725 | <0.001 |
| ARC           | <0.001 | 1.256 | 1.193~1.322 | <0.001 |
| MIR7-3HG      | <0.001 | 0.794 | 0.745~0.846 | <0.001 |
| NDRG4         | <0.001 | 0.752 | 0.700~0.807 | <0.001 |
| CTC-471F3.5   | <0.001 | 1.956 | 1.684~2.272 | <0.001 |
| TWISTNB       | <0.001 | 1.732 | 1.534~1.956 | <0.001 |
| UNC45A        | <0.001 | 1.681 | 1.481~1.907 | <0.001 |
| PCSK2         | <0.001 | 0.784 | 0.737~0.833 | <0.001 |
| NUP107        | <0.001 | 1.272 | 1.206~1.341 | <0.001 |
| RASGRF1       | <0.001 | 0.722 | 0.675~0.773 | <0.001 |
| RNF4          | <0.001 | 1.627 | 1.436~1.844 | <0.001 |
| VNN1          | <0.001 | 2.079 | 1.735~2.492 | <0.001 |
| COPB2         | <0.001 | 1.620 | 1.448~1.812 | <0.001 |
| RP11-179A16.1 | <0.001 | 0.462 | 0.356~0.601 | <0.001 |
| LINC00896     | <0.001 | 2.098 | 1.653~2.663 | <0.001 |
| SLC35F6       | <0.001 | 1.910 | 1.616~2.258 | <0.001 |
| ASTN2         | <0.001 | 0.690 | 0.636~0.748 | <0.001 |
| RP4-657D16.3  | <0.001 | 1.905 | 1.631~2.225 | <0.001 |
| CDH10         | <0.001 | 0.740 | 0.693~0.790 | <0.001 |
| ARMCX6        | <0.001 | 1.477 | 1.347~1.619 | <0.001 |
| NPTXR         | <0.001 | 0.778 | 0.730~0.829 | <0.001 |
| DHRXS         | <0.001 | 1.816 | 1.572~2.098 | <0.001 |
| NMNAT1        | <0.001 | 1.785 | 1.530~2.083 | <0.001 |
| SLC6A6        | <0.001 | 1.509 | 1.390~1.639 | <0.001 |
| RP11-31F15.1  | <0.001 | 1.987 | 1.721~2.295 | <0.001 |
| PINLYP        | <0.001 | 1.336 | 1.258~1.419 | <0.001 |
| TBC1D10C      | <0.001 | 1.373 | 1.257~1.500 | <0.001 |
| RP5-1142A6.2  | <0.001 | 0.181 | 0.115~0.285 | <0.001 |
| HES6          | <0.001 | 0.830 | 0.795~0.867 | <0.001 |
| IFFO1         | <0.001 | 1.505 | 1.356~1.671 | <0.001 |
| NBEAL2        | <0.001 | 1.498 | 1.365~1.645 | <0.001 |
| MMAA          | <0.001 | 2.009 | 1.703~2.371 | <0.001 |

|               |        |       |             |        |
|---------------|--------|-------|-------------|--------|
| ACTR3         | <0.001 | 1.535 | 1.403~1.679 | <0.001 |
| GATA5         | <0.001 | 0.156 | 0.094~0.260 | <0.001 |
| MICU1         | <0.001 | 0.685 | 0.622~0.754 | <0.001 |
| RP11-876N24.5 | <0.001 | 1.995 | 1.689~2.356 | <0.001 |
| PSTPIP2       | <0.001 | 1.538 | 1.389~1.703 | <0.001 |
| RP4-669P10.19 | <0.001 | 0.637 | 0.575~0.705 | <0.001 |
| TMEM145       | <0.001 | 0.737 | 0.689~0.789 | <0.001 |
| SIPA1L1       | <0.001 | 1.559 | 1.423~1.707 | <0.001 |
| SNHG14        | <0.001 | 0.751 | 0.693~0.814 | <0.001 |
| CENPO         | <0.001 | 1.705 | 1.504~1.933 | <0.001 |
| C9orf3        | <0.001 | 1.622 | 1.472~1.788 | <0.001 |
| IDO1          | <0.001 | 1.433 | 1.280~1.605 | <0.001 |
| EMILIN3       | <0.001 | 1.305 | 1.236~1.378 | <0.001 |
| LHPP          | <0.001 | 0.821 | 0.778~0.865 | <0.001 |
| NDN           | <0.001 | 0.809 | 0.765~0.856 | <0.001 |
| ZNF547        | <0.001 | 1.690 | 1.495~1.911 | <0.001 |
| ADAM32        | <0.001 | 1.619 | 1.439~1.822 | <0.001 |
| CCDC146       | <0.001 | 1.386 | 1.282~1.499 | <0.001 |
| KCNJ3         | <0.001 | 0.662 | 0.596~0.736 | <0.001 |
| CTD-3099C6.11 | <0.001 | 1.611 | 1.464~1.774 | <0.001 |
| ALOX12B       | <0.001 | 0.348 | 0.261~0.464 | <0.001 |
| PRKAG2        | <0.001 | 0.743 | 0.685~0.805 | <0.001 |
| SFTPD         | <0.001 | 0.594 | 0.518~0.680 | <0.001 |
| HNRNPA2B1     | <0.001 | 1.594 | 1.421~1.787 | <0.001 |
| CTC-525D6.1   | <0.001 | 0.361 | 0.269~0.484 | <0.001 |
| EIF4E         | <0.001 | 1.315 | 1.225~1.411 | <0.001 |
| KRT8P12       | <0.001 | 1.798 | 1.572~2.057 | <0.001 |
| RND3          | <0.001 | 1.370 | 1.276~1.471 | <0.001 |
| FXD2          | <0.001 | 0.684 | 0.626~0.748 | <0.001 |
| INPP5B        | <0.001 | 1.971 | 1.695~2.293 | <0.001 |
| CRYL1         | <0.001 | 0.731 | 0.679~0.787 | <0.001 |
| CTC-1337H24.1 | <0.001 | 1.522 | 1.387~1.670 | <0.001 |
| ERBB2         | <0.001 | 1.596 | 1.442~1.768 | <0.001 |
| PIP5K1A       | <0.001 | 1.696 | 1.531~1.879 | <0.001 |
| EPB42         | <0.001 | 0.302 | 0.212~0.431 | <0.001 |
| PLXDC1        | <0.001 | 1.464 | 1.348~1.589 | <0.001 |
| CCDC30        | <0.001 | 1.812 | 1.596~2.057 | <0.001 |
| HYOU1         | <0.001 | 1.482 | 1.344~1.634 | <0.001 |
| CTF1          | <0.001 | 1.563 | 1.406~1.739 | <0.001 |
| DONSON        | <0.001 | 1.457 | 1.318~1.611 | <0.001 |
| CLIC6         | <0.001 | 1.474 | 1.303~1.668 | <0.001 |
| NSMF          | <0.001 | 0.769 | 0.715~0.828 | <0.001 |
| STRN4         | <0.001 | 1.900 | 1.662~2.173 | <0.001 |
| SPTB          | <0.001 | 0.671 | 0.603~0.746 | <0.001 |
| AL022476.2    | <0.001 | 0.222 | 0.151~0.326 | <0.001 |
| DNASE1L1      | <0.001 | 1.632 | 1.465~1.818 | <0.001 |
| RBFOX3        | <0.001 | 0.795 | 0.754~0.839 | <0.001 |
| PMEPA1        | <0.001 | 1.469 | 1.355~1.591 | <0.001 |
| OTOGL         | <0.001 | 0.438 | 0.356~0.539 | <0.001 |
| C9orf47       | <0.001 | 1.819 | 1.566~2.112 | <0.001 |
| SIRPB2        | <0.001 | 1.677 | 1.497~1.879 | <0.001 |
| UQCRB         | <0.001 | 0.871 | 0.833~0.912 | <0.001 |

|               |        |       |             |        |
|---------------|--------|-------|-------------|--------|
| COL14A1       | <0.001 | 1.283 | 1.199~1.373 | <0.001 |
| TP53I13       | <0.001 | 1.311 | 1.220~1.408 | <0.001 |
| TMEM106A      | <0.001 | 1.608 | 1.432~1.805 | <0.001 |
| EYA1          | <0.001 | 0.745 | 0.693~0.800 | <0.001 |
| GPT           | <0.001 | 0.661 | 0.600~0.729 | <0.001 |
| COLEC12       | <0.001 | 1.313 | 1.227~1.405 | <0.001 |
| RP3-395M20.12 | <0.001 | 0.761 | 0.712~0.813 | <0.001 |
| CCK           | <0.001 | 0.860 | 0.830~0.891 | <0.001 |
| FAM92B        | <0.001 | 1.641 | 1.428~1.885 | <0.001 |
| LMAN2         | <0.001 | 1.458 | 1.320~1.610 | <0.001 |
| TMEM60        | <0.001 | 1.504 | 1.354~1.671 | <0.001 |
| STAT1         | <0.001 | 1.366 | 1.274~1.464 | <0.001 |
| ANKRD52       | <0.001 | 1.756 | 1.566~1.968 | <0.001 |
| TCEAL3        | <0.001 | 0.815 | 0.762~0.871 | <0.001 |
| RP11-97O12.2  | <0.001 | 0.072 | 0.037~0.139 | <0.001 |
| AC006978.6    | <0.001 | 1.798 | 1.573~2.055 | <0.001 |
| ERGIC1        | <0.001 | 1.674 | 1.500~1.867 | <0.001 |
| KLF6          | <0.001 | 1.506 | 1.392~1.630 | <0.001 |
| IL2RA         | <0.001 | 1.365 | 1.254~1.486 | <0.001 |
| SNX20         | <0.001 | 1.541 | 1.392~1.707 | <0.001 |
| ASB6          | <0.001 | 2.179 | 1.823~2.604 | <0.001 |
| MR1           | <0.001 | 1.574 | 1.431~1.732 | <0.001 |
| FAM86DP       | <0.001 | 1.730 | 1.531~1.955 | <0.001 |
| CDK4          | <0.001 | 1.279 | 1.212~1.350 | <0.001 |
| FEM1C         | <0.001 | 1.674 | 1.513~1.852 | <0.001 |
| ACP2          | <0.001 | 1.704 | 1.476~1.966 | <0.001 |
| RINL          | <0.001 | 1.476 | 1.344~1.622 | <0.001 |
| ARSD          | <0.001 | 1.647 | 1.479~1.834 | <0.001 |
| FAM187A       | <0.001 | 1.329 | 1.254~1.408 | <0.001 |
| ANKRD53       | <0.001 | 1.688 | 1.523~1.871 | <0.001 |
| CPT2          | <0.001 | 1.864 | 1.606~2.162 | <0.001 |
| DERL1         | <0.001 | 1.773 | 1.553~2.025 | <0.001 |
| WASF3         | <0.001 | 0.731 | 0.685~0.779 | <0.001 |
| ZIK1          | <0.001 | 1.710 | 1.532~1.908 | <0.001 |
| MAN2B1        | <0.001 | 1.329 | 1.225~1.441 | <0.001 |
| PPP1R13B      | <0.001 | 0.565 | 0.498~0.642 | <0.001 |
| EFEMP1        | <0.001 | 1.273 | 1.209~1.339 | <0.001 |
| PKN3          | <0.001 | 1.730 | 1.546~1.937 | <0.001 |
| ALPL          | <0.001 | 0.753 | 0.701~0.810 | <0.001 |
| MFSD4         | <0.001 | 0.717 | 0.661~0.777 | <0.001 |
| CHST14        | <0.001 | 1.565 | 1.415~1.732 | <0.001 |
| ARL9          | <0.001 | 1.700 | 1.509~1.916 | <0.001 |
| MEMO1         | <0.001 | 2.111 | 1.772~2.516 | <0.001 |
| DUSP14        | <0.001 | 1.575 | 1.427~1.737 | <0.001 |
| NYAP2         | <0.001 | 0.208 | 0.140~0.309 | <0.001 |
| SH3GL3        | <0.001 | 0.778 | 0.734~0.824 | <0.001 |
| CTGF          | <0.001 | 1.231 | 1.163~1.304 | <0.001 |
| EMD           | <0.001 | 1.649 | 1.451~1.873 | <0.001 |
| MB            | <0.001 | 0.608 | 0.536~0.690 | <0.001 |
| SAP30         | <0.001 | 1.606 | 1.428~1.806 | <0.001 |
| RP5-1057J7.6  | <0.001 | 1.739 | 1.534~1.971 | <0.001 |
| FNBP1L        | <0.001 | 1.534 | 1.412~1.666 | <0.001 |

|               |        |       |             |        |
|---------------|--------|-------|-------------|--------|
| GPR156        | <0.001 | 1.838 | 1.602~2.107 | <0.001 |
| MT-RNR2       | <0.001 | 0.915 | 0.895~0.936 | <0.001 |
| SSBP2         | <0.001 | 1.553 | 1.399~1.723 | <0.001 |
| FRZB          | <0.001 | 1.270 | 1.191~1.354 | <0.001 |
| IL1RN         | <0.001 | 1.279 | 1.200~1.363 | <0.001 |
| GS1-72M22.1   | <0.001 | 0.640 | 0.575~0.712 | <0.001 |
| PIK3R5        | <0.001 | 1.466 | 1.339~1.605 | <0.001 |
| WIZ           | <0.001 | 1.529 | 1.387~1.687 | <0.001 |
| RP11-441O15.3 | <0.001 | 0.383 | 0.308~0.475 | <0.001 |
| SERPINB1      | <0.001 | 1.438 | 1.325~1.561 | <0.001 |
| GIMAP2        | <0.001 | 1.527 | 1.389~1.679 | <0.001 |
| C4orf46       | <0.001 | 1.805 | 1.587~2.053 | <0.001 |
| RGS1          | <0.001 | 1.244 | 1.188~1.302 | <0.001 |
| DBF4          | <0.001 | 1.636 | 1.489~1.799 | <0.001 |
| DMRTA2        | <0.001 | 1.379 | 1.303~1.459 | <0.001 |
| ZNF503-AS2    | <0.001 | 1.625 | 1.419~1.861 | <0.001 |
| NOTUM         | <0.001 | 0.542 | 0.460~0.639 | <0.001 |
| FANCA         | <0.001 | 1.395 | 1.282~1.518 | <0.001 |
| RP11-152P17.2 | <0.001 | 1.636 | 1.451~1.843 | <0.001 |
| LTBP1         | <0.001 | 1.384 | 1.286~1.489 | <0.001 |
| CHFR          | <0.001 | 2.064 | 1.757~2.425 | <0.001 |
| TEP1          | <0.001 | 1.851 | 1.635~2.095 | <0.001 |
| ZNF584        | <0.001 | 1.799 | 1.599~2.025 | <0.001 |
| RP11-153M7.3  | <0.001 | 1.720 | 1.475~2.006 | <0.001 |
| C21orf59      | <0.001 | 1.456 | 1.325~1.599 | <0.001 |
| PSTK          | <0.001 | 0.672 | 0.610~0.740 | <0.001 |
| ATG4C         | <0.001 | 1.698 | 1.501~1.921 | <0.001 |
| PPP4C         | <0.001 | 1.597 | 1.434~1.778 | <0.001 |
| INPPL1        | <0.001 | 1.573 | 1.429~1.731 | <0.001 |
| CDK11A        | <0.001 | 1.586 | 1.442~1.745 | <0.001 |
| ATAD2         | <0.001 | 1.611 | 1.462~1.775 | <0.001 |
| RABL5         | <0.001 | 1.421 | 1.285~1.571 | <0.001 |
| SOHLH1        | <0.001 | 0.779 | 0.726~0.836 | <0.001 |
| RP6-201G10.2  | <0.001 | 0.723 | 0.668~0.783 | <0.001 |
| LIMD1-AS1     | <0.001 | 1.442 | 1.329~1.564 | <0.001 |
| BZW1          | <0.001 | 1.633 | 1.465~1.821 | <0.001 |
| CITED1        | <0.001 | 1.228 | 1.163~1.296 | <0.001 |
| MOSPD1        | <0.001 | 1.752 | 1.515~2.027 | <0.001 |
| SIRT7         | <0.001 | 1.838 | 1.586~2.131 | <0.001 |
| ASB5          | <0.001 | 1.610 | 1.440~1.801 | <0.001 |
| SLC1A1        | <0.001 | 0.702 | 0.648~0.760 | <0.001 |
| KLHDC7B       | <0.001 | 1.723 | 1.459~2.035 | <0.001 |
| HSFX1         | <0.001 | 0.615 | 0.535~0.707 | <0.001 |
| RP11-63P12.6  | <0.001 | 2.507 | 1.995~3.149 | <0.001 |
| FRMPD2        | <0.001 | 0.560 | 0.487~0.645 | <0.001 |
| APOL1         | <0.001 | 1.362 | 1.268~1.464 | <0.001 |
| S100A8        | <0.001 | 1.183 | 1.137~1.230 | <0.001 |
| SLN           | <0.001 | 1.187 | 1.144~1.231 | <0.001 |
| ARSK          | <0.001 | 2.134 | 1.818~2.505 | <0.001 |
| TRAPPC2P1     | <0.001 | 1.477 | 1.318~1.656 | <0.001 |
| GAL3ST1       | <0.001 | 0.772 | 0.723~0.824 | <0.001 |
| RP11-397O8.7  | <0.001 | 0.629 | 0.562~0.704 | <0.001 |

|               |        |       |             |        |
|---------------|--------|-------|-------------|--------|
| AP001469.9    | <0.001 | 0.553 | 0.480~0.638 | <0.001 |
| EIF4G1        | <0.001 | 1.634 | 1.453~1.838 | <0.001 |
| SCIN          | <0.001 | 1.280 | 1.207~1.356 | <0.001 |
| HOXA13        | <0.001 | 1.466 | 1.286~1.671 | <0.001 |
| HLA-DOA       | <0.001 | 1.309 | 1.227~1.395 | <0.001 |
| FPR3          | <0.001 | 1.424 | 1.326~1.530 | <0.001 |
| PRDX1         | <0.001 | 1.235 | 1.149~1.327 | <0.001 |
| RPA3          | <0.001 | 1.340 | 1.234~1.455 | <0.001 |
| ACTG1         | <0.001 | 1.667 | 1.483~1.874 | <0.001 |
| RP11-545E17.3 | <0.001 | 1.566 | 1.418~1.729 | <0.001 |
| PPM1L         | <0.001 | 0.597 | 0.538~0.663 | <0.001 |
| ZNF98         | <0.001 | 0.642 | 0.565~0.730 | <0.001 |
| MAPKAP1       | <0.001 | 1.639 | 1.437~1.870 | <0.001 |
| NAPSB         | <0.001 | 1.201 | 1.148~1.256 | <0.001 |
| MARVELD3      | <0.001 | 0.659 | 0.599~0.725 | <0.001 |
| NUTM2D        | <0.001 | 0.596 | 0.529~0.670 | <0.001 |
| KDM4A-AS1     | <0.001 | 1.791 | 1.599~2.004 | <0.001 |
| BOLA3         | <0.001 | 1.268 | 1.175~1.369 | <0.001 |
| CHRAC1        | <0.001 | 1.529 | 1.369~1.707 | <0.001 |
| AC011899.9    | <0.001 | 1.701 | 1.502~1.927 | <0.001 |
| CLEC2B        | <0.001 | 1.388 | 1.288~1.496 | <0.001 |
| 10-Sep        | <0.001 | 1.671 | 1.501~1.861 | <0.001 |
| HIST1H2AM     | <0.001 | 1.119 | 1.078~1.161 | <0.001 |
| CYTH1         | <0.001 | 0.691 | 0.626~0.764 | <0.001 |
| RP5-968P14.2  | <0.001 | 2.138 | 1.777~2.572 | <0.001 |
| PPP2R5A       | <0.001 | 0.701 | 0.644~0.763 | <0.001 |
| MYO1F         | <0.001 | 1.439 | 1.323~1.565 | <0.001 |
| NPM1P9        | <0.001 | 5.081 | 3.534~7.306 | <0.001 |
| HLX           | <0.001 | 1.480 | 1.358~1.614 | <0.001 |
| DESI1         | <0.001 | 0.683 | 0.610~0.765 | <0.001 |
| C16orf96      | <0.001 | 0.242 | 0.162~0.362 | <0.001 |
| STAB1         | <0.001 | 1.208 | 1.148~1.271 | <0.001 |
| RP11-698N11.4 | <0.001 | 0.597 | 0.521~0.685 | <0.001 |
| LENG9         | <0.001 | 1.533 | 1.379~1.704 | <0.001 |
| KIAA1161      | <0.001 | 0.700 | 0.643~0.762 | <0.001 |
| NOP16         | <0.001 | 1.664 | 1.482~1.869 | <0.001 |
| AC084219.4    | <0.001 | 1.708 | 1.522~1.918 | <0.001 |
| RPL23AP81     | <0.001 | 1.919 | 1.669~2.207 | <0.001 |
| PNMA5         | <0.001 | 0.681 | 0.605~0.767 | <0.001 |
| RHOQP1        | <0.001 | 1.854 | 1.590~2.160 | <0.001 |
| DDX5          | <0.001 | 1.531 | 1.387~1.690 | <0.001 |
| CTD-2377O17.1 | <0.001 | 0.525 | 0.458~0.601 | <0.001 |
| TMEM176B      | <0.001 | 1.315 | 1.243~1.391 | <0.001 |
| KIAA1524      | <0.001 | 1.884 | 1.691~2.100 | <0.001 |
| MEDAG         | <0.001 | 1.273 | 1.167~1.390 | <0.001 |
| AC008964.1    | <0.001 | 1.323 | 1.224~1.430 | <0.001 |
| FBLN7         | <0.001 | 1.343 | 1.255~1.436 | <0.001 |
| LTBP2         | <0.001 | 1.413 | 1.306~1.528 | <0.001 |
| ELTD1         | <0.001 | 1.501 | 1.373~1.640 | <0.001 |
| SVIL          | <0.001 | 1.518 | 1.397~1.650 | <0.001 |
| RNF122        | <0.001 | 1.665 | 1.511~1.834 | <0.001 |
| PABPC1L2B     | <0.001 | 0.610 | 0.526~0.709 | <0.001 |

|               |        |       |             |        |
|---------------|--------|-------|-------------|--------|
| PSORS1C1      | <0.001 | 1.304 | 1.214~1.399 | <0.001 |
| KLRC2         | <0.001 | 0.851 | 0.818~0.886 | <0.001 |
| BMF           | <0.001 | 1.502 | 1.362~1.656 | <0.001 |
| CTD-2537I9.12 | <0.001 | 1.563 | 1.421~1.719 | <0.001 |
| CD101         | <0.001 | 1.545 | 1.411~1.691 | <0.001 |
| RPL4          | <0.001 | 0.821 | 0.774~0.871 | <0.001 |
| MORN4         | <0.001 | 0.796 | 0.745~0.850 | <0.001 |
| RP4-647J21.1  | <0.001 | 2.450 | 1.916~3.134 | <0.001 |
| TRMT2B        | <0.001 | 1.724 | 1.513~1.964 | <0.001 |
| PIWIL4        | <0.001 | 1.783 | 1.558~2.040 | <0.001 |
| PNCK          | <0.001 | 0.772 | 0.727~0.820 | <0.001 |
| PNO1          | <0.001 | 1.898 | 1.642~2.194 | <0.001 |
| WLS           | <0.001 | 1.451 | 1.338~1.573 | <0.001 |
| SLC39A8       | <0.001 | 1.543 | 1.406~1.693 | <0.001 |
| CMTM4         | <0.001 | 0.653 | 0.599~0.713 | <0.001 |
| SLC7A7        | <0.001 | 1.555 | 1.427~1.694 | <0.001 |
| TRAF7         | <0.001 | 1.419 | 1.270~1.585 | <0.001 |
| CRH           | <0.001 | 0.580 | 0.501~0.672 | <0.001 |
| POLR2D        | <0.001 | 1.700 | 1.482~1.951 | <0.001 |
| HIST2H2AA3    | <0.001 | 1.323 | 1.238~1.414 | <0.001 |
| RP11-686F15.3 | <0.001 | 0.416 | 0.338~0.511 | <0.001 |
| MOV10L1       | <0.001 | 0.531 | 0.461~0.612 | <0.001 |
| ZNF234        | <0.001 | 1.746 | 1.550~1.966 | <0.001 |
| AC018766.5    | <0.001 | 1.499 | 1.377~1.632 | <0.001 |
| CHD1          | <0.001 | 1.663 | 1.505~1.837 | <0.001 |
| CD5           | <0.001 | 1.570 | 1.338~1.843 | <0.001 |
| INTS9         | <0.001 | 1.813 | 1.573~2.091 | <0.001 |
| RP11-210M15.2 | <0.001 | 0.656 | 0.596~0.722 | <0.001 |
| PLCB1         | <0.001 | 0.670 | 0.618~0.727 | <0.001 |
| ANKLE2        | <0.001 | 2.125 | 1.829~2.470 | <0.001 |
| GPR27         | <0.001 | 0.721 | 0.676~0.770 | <0.001 |
| NFKB1         | <0.001 | 1.910 | 1.684~2.165 | <0.001 |
| RP11-531A24.3 | <0.001 | 0.469 | 0.345~0.639 | <0.001 |
| DHRS9         | <0.001 | 0.749 | 0.695~0.809 | <0.001 |
| ZRANB1        | <0.001 | 0.636 | 0.566~0.714 | <0.001 |
| SFXN4         | <0.001 | 0.759 | 0.708~0.813 | <0.001 |
| FURIN         | <0.001 | 1.689 | 1.493~1.911 | <0.001 |
| IL13RA1       | <0.001 | 1.458 | 1.336~1.590 | <0.001 |
| FANCB         | <0.001 | 2.452 | 2.010~2.990 | <0.001 |
| PLK5          | <0.001 | 0.600 | 0.536~0.670 | <0.001 |
| CCDC15        | <0.001 | 1.975 | 1.706~2.286 | <0.001 |
| TMEM64        | <0.001 | 1.669 | 1.498~1.860 | <0.001 |
| ZC3H12B       | <0.001 | 0.411 | 0.343~0.491 | <0.001 |
| RP11-434I12.2 | <0.001 | 3.448 | 2.697~4.410 | <0.001 |
| STAP1         | <0.001 | 2.428 | 1.868~3.155 | <0.001 |
| SP140         | <0.001 | 1.637 | 1.431~1.872 | <0.001 |
| TMSB4XP8      | <0.001 | 1.323 | 1.231~1.421 | <0.001 |
| TMEM196       | <0.001 | 0.630 | 0.563~0.706 | <0.001 |
| ABT1          | <0.001 | 1.829 | 1.579~2.118 | <0.001 |
| PIK3R6        | <0.001 | 1.747 | 1.543~1.978 | <0.001 |
| TPPP2         | <0.001 | 0.256 | 0.190~0.346 | <0.001 |
| PARS2         | <0.001 | 2.223 | 1.873~2.639 | <0.001 |

|               |        |       |             |        |
|---------------|--------|-------|-------------|--------|
| HNRNPCP1      | <0.001 | 2.333 | 1.950~2.791 | <0.001 |
| BRPF1         | <0.001 | 1.947 | 1.704~2.224 | <0.001 |
| BAZ1B         | <0.001 | 2.103 | 1.826~2.421 | <0.001 |
| CTD-2227E11.1 | <0.001 | 2.050 | 1.795~2.340 | <0.001 |
| C12orf39      | <0.001 | 0.782 | 0.735~0.832 | <0.001 |
| PTGIR         | <0.001 | 1.607 | 1.440~1.793 | <0.001 |
| GPM6A         | <0.001 | 0.783 | 0.740~0.828 | <0.001 |
| STK32C        | <0.001 | 0.718 | 0.666~0.774 | <0.001 |
| CHADL         | <0.001 | 0.759 | 0.717~0.804 | <0.001 |
| GRIK2         | <0.001 | 0.722 | 0.677~0.771 | <0.001 |
| HIST1H2AI     | <0.001 | 1.124 | 1.075~1.176 | <0.001 |
| HOXD-AS2      | <0.001 | 1.247 | 1.172~1.327 | <0.001 |
| RP11-573D15.2 | <0.001 | 0.456 | 0.372~0.559 | <0.001 |
| SNRPC         | <0.001 | 1.452 | 1.320~1.598 | <0.001 |
| SOD3          | <0.001 | 1.214 | 1.156~1.275 | <0.001 |
| CTD-3199J23.4 | <0.001 | 0.772 | 0.724~0.823 | <0.001 |
| PARVG         | <0.001 | 1.375 | 1.278~1.479 | <0.001 |
| GPR84         | <0.001 | 1.520 | 1.385~1.667 | <0.001 |
| ARL11         | <0.001 | 2.135 | 1.805~2.525 | <0.001 |
| TNFRSF14      | <0.001 | 1.403 | 1.303~1.512 | <0.001 |
| CASP5         | <0.001 | 2.212 | 1.871~2.615 | <0.001 |
| RP3-460G2.2   | <0.001 | 1.359 | 1.275~1.448 | <0.001 |
| RP5-886K2.3   | <0.001 | 2.026 | 1.755~2.339 | <0.001 |
| RPS6KL1       | <0.001 | 0.668 | 0.616~0.725 | <0.001 |
| CXCR6         | <0.001 | 1.418 | 1.233~1.630 | <0.001 |
| RP11-697N18.3 | <0.001 | 1.654 | 1.401~1.953 | <0.001 |
| NRIP2         | <0.001 | 0.651 | 0.579~0.731 | <0.001 |
| CACNG3        | <0.001 | 0.754 | 0.701~0.812 | <0.001 |
| PRDX4         | <0.001 | 1.396 | 1.286~1.516 | <0.001 |
| MBD4          | <0.001 | 1.705 | 1.498~1.940 | <0.001 |
| FAM26E        | <0.001 | 2.830 | 2.202~3.638 | <0.001 |
| KB-1125A3.11  | <0.001 | 0.639 | 0.574~0.711 | <0.001 |
| RP11-54A9.1   | <0.001 | 1.930 | 1.654~2.252 | <0.001 |
| MXRA8         | <0.001 | 1.393 | 1.293~1.501 | <0.001 |
| MAP1A         | <0.001 | 0.689 | 0.636~0.746 | <0.001 |
| GLP1R         | <0.001 | 0.306 | 0.221~0.423 | <0.001 |
| RP11-344E13.3 | <0.001 | 1.578 | 1.401~1.778 | <0.001 |
| HPS3          | <0.001 | 1.731 | 1.515~1.977 | <0.001 |
| ARFGAP2       | <0.001 | 0.570 | 0.498~0.652 | <0.001 |
| TRIM17        | <0.001 | 0.610 | 0.546~0.683 | <0.001 |
| CTD-2562J17.7 | <0.001 | 0.727 | 0.676~0.781 | <0.001 |
| OLIG1         | <0.001 | 0.855 | 0.826~0.885 | <0.001 |
| ZNF75A        | <0.001 | 1.740 | 1.541~1.964 | <0.001 |
| TCIRG1        | <0.001 | 1.329 | 1.249~1.414 | <0.001 |
| GBP3          | <0.001 | 1.387 | 1.293~1.489 | <0.001 |
| NFATC2        | <0.001 | 1.806 | 1.591~2.051 | <0.001 |
| PCDH7         | <0.001 | 0.701 | 0.650~0.756 | <0.001 |
| SPRY2         | <0.001 | 1.405 | 1.308~1.508 | <0.001 |
| CCDC40        | <0.001 | 1.496 | 1.379~1.624 | <0.001 |
| SLC35F5       | <0.001 | 1.764 | 1.582~1.968 | <0.001 |
| KIRREL        | <0.001 | 1.622 | 1.489~1.767 | <0.001 |
| GF1           | <0.001 | 2.108 | 1.669~2.662 | <0.001 |



|               |        |       |             |        |
|---------------|--------|-------|-------------|--------|
| ARPC2         | <0.001 | 1.414 | 1.275~1.567 | <0.001 |
| OR7E28P       | <0.001 | 0.453 | 0.364~0.563 | <0.001 |
| PPP1CB        | <0.001 | 1.406 | 1.288~1.536 | <0.001 |
| ATP2B3        | <0.001 | 0.695 | 0.633~0.763 | <0.001 |
| TPTE2P3       | <0.001 | 0.021 | 0.008~0.054 | <0.001 |
| LRWD1         | <0.001 | 1.609 | 1.432~1.806 | <0.001 |
| UPP2          | <0.001 | 0.346 | 0.269~0.446 | <0.001 |
| ASPN          | <0.001 | 1.472 | 1.344~1.613 | <0.001 |
| HIST1H1C      | <0.001 | 1.184 | 1.138~1.232 | <0.001 |
| SUSD4         | <0.001 | 0.735 | 0.685~0.790 | <0.001 |
| CD68          | <0.001 | 1.279 | 1.209~1.353 | <0.001 |
| SRSF11        | <0.001 | 1.380 | 1.284~1.484 | <0.001 |
| PAK3          | <0.001 | 0.666 | 0.609~0.728 | <0.001 |
| PPM1M         | <0.001 | 1.673 | 1.495~1.872 | <0.001 |
| RP11-848P1.2  | <0.001 | 1.985 | 1.715~2.297 | <0.001 |
| ASPDH         | <0.001 | 0.759 | 0.717~0.803 | <0.001 |
| EFNA4         | <0.001 | 1.662 | 1.497~1.846 | <0.001 |
| DGKB          | <0.001 | 0.668 | 0.615~0.725 | <0.001 |
| ATP1A3        | <0.001 | 0.798 | 0.762~0.836 | <0.001 |
| RP11-93B14.5  | <0.001 | 1.402 | 1.310~1.501 | <0.001 |
| RAB8A         | <0.001 | 1.645 | 1.488~1.818 | <0.001 |
| ADCY5         | <0.001 | 0.645 | 0.590~0.704 | <0.001 |
| CTC-297N7.5   | <0.001 | 1.680 | 1.518~1.859 | <0.001 |
| TTC9B         | <0.001 | 0.798 | 0.764~0.833 | <0.001 |
| RP11-79H23.3  | <0.001 | 2.776 | 2.007~3.841 | <0.001 |
| AP000695.6    | <0.001 | 2.020 | 1.645~2.481 | <0.001 |
| GLUD1P2       | <0.001 | 0.579 | 0.496~0.676 | <0.001 |
| NXF3          | <0.001 | 1.505 | 1.341~1.689 | <0.001 |
| LINC00641     | <0.001 | 0.749 | 0.693~0.810 | <0.001 |
| CCL5          | <0.001 | 1.239 | 1.172~1.311 | <0.001 |
| LYAR          | <0.001 | 1.568 | 1.399~1.758 | <0.001 |
| SNX9          | <0.001 | 1.528 | 1.373~1.701 | <0.001 |
| DNM2          | <0.001 | 1.733 | 1.510~1.990 | <0.001 |
| HIST1H2AE     | <0.001 | 1.169 | 1.125~1.215 | <0.001 |
| GNAZ          | <0.001 | 0.718 | 0.661~0.779 | <0.001 |
| A2ML1         | <0.001 | 0.623 | 0.555~0.699 | <0.001 |
| HCCS          | <0.001 | 1.629 | 1.447~1.835 | <0.001 |
| RP11-192H23.5 | <0.001 | 0.855 | 0.824~0.888 | <0.001 |
| LITAF         | <0.001 | 1.413 | 1.301~1.535 | <0.001 |
| RP11-686D22.8 | <0.001 | 2.066 | 1.740~2.453 | <0.001 |
| DTX2          | <0.001 | 1.509 | 1.369~1.662 | <0.001 |
| PTGR2         | <0.001 | 0.684 | 0.627~0.747 | <0.001 |
| FBXL12        | <0.001 | 1.778 | 1.560~2.027 | <0.001 |
| FAM76A        | <0.001 | 1.932 | 1.663~2.244 | <0.001 |
| HMGN2P5       | <0.001 | 1.365 | 1.272~1.465 | <0.001 |
| MLKL          | <0.001 | 1.642 | 1.468~1.837 | <0.001 |
| XRCC1         | <0.001 | 1.774 | 1.563~2.015 | <0.001 |
| TMEM254-AS1   | <0.001 | 0.538 | 0.470~0.616 | <0.001 |
| CDC42EP3      | <0.001 | 1.531 | 1.395~1.680 | <0.001 |
| CSMD1         | <0.001 | 0.613 | 0.552~0.680 | <0.001 |
| BTNL9         | <0.001 | 0.657 | 0.601~0.717 | <0.001 |
| HMGB3P22      | <0.001 | 0.616 | 0.557~0.682 | <0.001 |

|                |        |       |             |        |
|----------------|--------|-------|-------------|--------|
| MLEC           | <0.001 | 1.743 | 1.555~1.953 | <0.001 |
| UNC80          | <0.001 | 0.611 | 0.556~0.671 | <0.001 |
| BARX1          | <0.001 | 1.432 | 1.342~1.528 | <0.001 |
| CTD-2296D1.2   | <0.001 | 0.438 | 0.331~0.579 | <0.001 |
| PMEL           | <0.001 | 1.567 | 1.373~1.789 | <0.001 |
| DENR           | <0.001 | 1.492 | 1.326~1.678 | <0.001 |
| CD2            | <0.001 | 1.361 | 1.249~1.484 | <0.001 |
| GHITM          | <0.001 | 0.778 | 0.725~0.834 | <0.001 |
| WI2-85898F10.1 | <0.001 | 0.526 | 0.440~0.628 | <0.001 |
| CTD-2130F23.2  | <0.001 | 0.422 | 0.334~0.533 | <0.001 |
| SSTR5          | <0.001 | 0.566 | 0.486~0.658 | <0.001 |
| KCP            | <0.001 | 1.652 | 1.447~1.886 | <0.001 |
| GABRA1         | <0.001 | 0.787 | 0.740~0.838 | <0.001 |
| TMEM132D       | <0.001 | 0.625 | 0.554~0.705 | <0.001 |
| RP11-445H22.3  | <0.001 | 0.515 | 0.436~0.609 | <0.001 |
| NUP85          | <0.001 | 1.596 | 1.420~1.795 | <0.001 |
| C3orf18        | <0.001 | 0.637 | 0.569~0.713 | <0.001 |
| CACNA1A        | <0.001 | 0.782 | 0.736~0.832 | <0.001 |
| LRRC32         | <0.001 | 1.299 | 1.218~1.385 | <0.001 |
| CMTM7          | <0.001 | 1.389 | 1.282~1.504 | <0.001 |
| PIGZ           | <0.001 | 0.700 | 0.642~0.763 | <0.001 |
| UBE2J2         | <0.001 | 1.548 | 1.394~1.718 | <0.001 |
| SEMA4G         | <0.001 | 0.602 | 0.534~0.679 | <0.001 |
| P2RX5          | <0.001 | 0.672 | 0.612~0.739 | <0.001 |
| FBP1           | <0.001 | 1.391 | 1.286~1.504 | <0.001 |
| ALCAM          | <0.001 | 0.758 | 0.711~0.809 | <0.001 |
| TAPSAR1        | <0.001 | 1.431 | 1.317~1.556 | <0.001 |
| CRHR1          | <0.001 | 0.641 | 0.578~0.710 | <0.001 |
| ZNF20          | <0.001 | 2.076 | 1.755~2.456 | <0.001 |
| MYL9           | <0.001 | 1.269 | 1.201~1.340 | <0.001 |
| PSMD5          | <0.001 | 1.785 | 1.565~2.035 | <0.001 |
| SLC14A2        | <0.001 | 0.298 | 0.227~0.391 | <0.001 |
| SLC2A4RG       | <0.001 | 1.370 | 1.277~1.470 | <0.001 |
| C6ORF165       | <0.001 | 1.708 | 1.515~1.925 | <0.001 |
| TMEM220        | <0.001 | 1.598 | 1.440~1.773 | <0.001 |
| DNM3           | <0.001 | 0.661 | 0.603~0.724 | <0.001 |
| HSPA1B         | <0.001 | 1.307 | 1.234~1.385 | <0.001 |
| NMNAT3         | <0.001 | 1.453 | 1.341~1.575 | <0.001 |
| ELMOD2         | <0.001 | 2.049 | 1.757~2.390 | <0.001 |
| SH3KBP1        | <0.001 | 1.686 | 1.508~1.886 | <0.001 |
| SYBU           | <0.001 | 0.721 | 0.672~0.773 | <0.001 |
| VKORC1         | <0.001 | 1.527 | 1.396~1.671 | <0.001 |
| PTPRN          | <0.001 | 0.809 | 0.774~0.846 | <0.001 |
| IQCG           | <0.001 | 1.559 | 1.421~1.711 | <0.001 |
| UTP20          | <0.001 | 2.183 | 1.854~2.570 | <0.001 |
| CASP1          | <0.001 | 1.451 | 1.345~1.566 | <0.001 |
| STARD10        | <0.001 | 0.732 | 0.687~0.781 | <0.001 |
| PALLD          | <0.001 | 1.517 | 1.395~1.650 | <0.001 |
| HAUS5          | <0.001 | 1.700 | 1.532~1.886 | <0.001 |
| HNRNPAB        | <0.001 | 1.763 | 1.577~1.970 | <0.001 |
| CTD-2210P24.4  | <0.001 | 0.727 | 0.684~0.774 | <0.001 |
| FAM86B3P       | <0.001 | 1.642 | 1.491~1.807 | <0.001 |

|               |        |       |             |        |
|---------------|--------|-------|-------------|--------|
| CRLF3         | <0.001 | 2.279 | 1.943~2.673 | <0.001 |
| MSANTD3       | <0.001 | 1.985 | 1.742~2.262 | <0.001 |
| ARHGEF26-AS1  | <0.001 | 0.660 | 0.611~0.714 | <0.001 |
| C11orf63      | <0.001 | 1.804 | 1.623~2.005 | <0.001 |
| FAM213A       | <0.001 | 0.836 | 0.784~0.892 | <0.001 |
| RP11-416I2.1  | <0.001 | 0.627 | 0.539~0.730 | <0.001 |
| LINC00939     | <0.001 | 4.156 | 2.675~6.459 | <0.001 |
| BCAS2         | <0.001 | 1.349 | 1.238~1.470 | <0.001 |
| RP11-322E11.5 | <0.001 | 1.516 | 1.350~1.702 | <0.001 |
| TREML3P       | <0.001 | 1.768 | 1.510~2.068 | <0.001 |
| RXFP1         | <0.001 | 0.591 | 0.512~0.682 | <0.001 |
| ARHGEF4       | <0.001 | 0.758 | 0.704~0.816 | <0.001 |
| ATP1A1        | <0.001 | 1.364 | 1.256~1.481 | <0.001 |
| RPAP3         | <0.001 | 1.632 | 1.435~1.856 | <0.001 |
| TDRD9         | <0.001 | 0.641 | 0.571~0.719 | <0.001 |
| FGF11         | <0.001 | 0.748 | 0.694~0.806 | <0.001 |
| DOK2          | <0.001 | 1.351 | 1.250~1.460 | <0.001 |
| XBP1          | <0.001 | 1.458 | 1.327~1.604 | <0.001 |
| HAS3          | <0.001 | 1.487 | 1.348~1.640 | <0.001 |
| DGUOK-AS1     | <0.001 | 1.477 | 1.342~1.626 | <0.001 |
| BAIAP2-AS1    | <0.001 | 0.642 | 0.576~0.716 | <0.001 |
| IGFBP4        | <0.001 | 1.268 | 1.198~1.342 | <0.001 |
| MSMO1         | <0.001 | 0.755 | 0.706~0.807 | <0.001 |
| AQP7          | <0.001 | 0.178 | 0.118~0.269 | <0.001 |
| RP3-510D11.2  | <0.001 | 1.677 | 1.484~1.895 | <0.001 |
| DDN           | <0.001 | 0.810 | 0.771~0.852 | <0.001 |
| TMED2         | <0.001 | 1.432 | 1.316~1.558 | <0.001 |
| LINC00908     | <0.001 | 1.944 | 1.668~2.265 | <0.001 |
| BRINP2        | <0.001 | 0.727 | 0.675~0.782 | <0.001 |
| RP11-75C9.1   | <0.001 | 0.659 | 0.599~0.726 | <0.001 |
| SYN2          | <0.001 | 0.806 | 0.767~0.846 | <0.001 |
| ARMCX2        | <0.001 | 1.502 | 1.370~1.647 | <0.001 |
| CCDC86        | <0.001 | 1.670 | 1.487~1.875 | <0.001 |
| GALNT7        | <0.001 | 1.539 | 1.396~1.696 | <0.001 |
| ZNF211        | <0.001 | 1.639 | 1.466~1.831 | <0.001 |
| ZFP36L2       | <0.001 | 1.429 | 1.320~1.548 | <0.001 |
| FAS           | <0.001 | 1.417 | 1.311~1.532 | <0.001 |
| MMP2          | <0.001 | 1.340 | 1.257~1.429 | <0.001 |
| FAM163B       | <0.001 | 0.811 | 0.775~0.849 | <0.001 |
| ARF4          | <0.001 | 1.513 | 1.382~1.655 | <0.001 |
| CD14          | <0.001 | 1.263 | 1.201~1.329 | <0.001 |
| IL7           | <0.001 | 1.728 | 1.535~1.946 | <0.001 |
| HOXD8         | <0.001 | 1.304 | 1.231~1.380 | <0.001 |
| SEMA6B        | <0.001 | 0.789 | 0.750~0.830 | <0.001 |
| FAM72B        | <0.001 | 1.910 | 1.663~2.194 | <0.001 |
| NFATC1        | <0.001 | 1.502 | 1.377~1.638 | <0.001 |
| ATP8A1        | <0.001 | 0.721 | 0.672~0.772 | <0.001 |
| RP11-451M19.3 | <0.001 | 0.498 | 0.431~0.577 | <0.001 |
| CEPT1         | <0.001 | 1.635 | 1.475~1.812 | <0.001 |
| COL27A1       | <0.001 | 1.428 | 1.326~1.538 | <0.001 |
| ZYX           | <0.001 | 1.437 | 1.332~1.549 | <0.001 |
| IL4R          | <0.001 | 1.532 | 1.402~1.673 | <0.001 |

|               |        |       |             |        |
|---------------|--------|-------|-------------|--------|
| ANPEP         | <0.001 | 1.380 | 1.292~1.473 | <0.001 |
| CDH11         | <0.001 | 1.404 | 1.310~1.504 | <0.001 |
| LINC00515     | <0.001 | 0.576 | 0.515~0.644 | <0.001 |
| TPST1         | <0.001 | 1.596 | 1.454~1.751 | <0.001 |
| ADAM9         | <0.001 | 1.455 | 1.353~1.566 | <0.001 |
| HRH1          | <0.001 | 1.612 | 1.469~1.769 | <0.001 |
| SNIP1         | <0.001 | 2.096 | 1.817~2.419 | <0.001 |
| NOTCH3        | <0.001 | 1.491 | 1.380~1.610 | <0.001 |
| DR1           | <0.001 | 1.725 | 1.554~1.915 | <0.001 |
| RP11-342M1.3  | <0.001 | 2.031 | 1.774~2.325 | <0.001 |
| RP11-524C21.2 | <0.001 | 1.990 | 1.746~2.268 | <0.001 |
| STK17A        | <0.001 | 1.564 | 1.438~1.702 | <0.001 |
| YY2           | <0.001 | 2.042 | 1.798~2.320 | <0.001 |
| RP11-231C18.2 | <0.001 | 0.729 | 0.647~0.822 | <0.001 |
| P4HA3         | <0.001 | 1.502 | 1.331~1.694 | <0.001 |
| PAAF1         | <0.001 | 0.775 | 0.720~0.834 | <0.001 |
| LBX1-AS1      | <0.001 | 1.443 | 1.298~1.604 | <0.001 |
| OSBPL2        | <0.001 | 0.703 | 0.635~0.777 | <0.001 |
| MTHFS         | <0.001 | 1.362 | 1.249~1.485 | <0.001 |
| LAMTOR5       | <0.001 | 1.321 | 1.224~1.426 | <0.001 |
| FAM155B       | <0.001 | 0.567 | 0.486~0.662 | <0.001 |
| CCDC23        | <0.001 | 1.357 | 1.249~1.476 | <0.001 |
| BID           | <0.001 | 0.775 | 0.722~0.830 | <0.001 |
| FAM101A       | <0.001 | 0.635 | 0.562~0.718 | <0.001 |
| TNFAIP8L1     | <0.001 | 1.526 | 1.362~1.709 | <0.001 |
| SCRT2         | <0.001 | 0.662 | 0.593~0.739 | <0.001 |
| CDK11B        | <0.001 | 1.575 | 1.396~1.778 | <0.001 |
| SRF           | <0.001 | 1.619 | 1.425~1.840 | <0.001 |
| SLC17A8       | <0.001 | 0.578 | 0.500~0.668 | <0.001 |
| HTR2C         | <0.001 | 0.330 | 0.246~0.441 | <0.001 |
| DTX1          | <0.001 | 0.716 | 0.656~0.781 | <0.001 |
| NAP1L5        | <0.001 | 0.778 | 0.730~0.831 | <0.001 |
| BIRC2         | <0.001 | 1.664 | 1.460~1.897 | <0.001 |
| G6PD          | <0.001 | 1.626 | 1.436~1.841 | <0.001 |
| S100A10       | <0.001 | 1.192 | 1.140~1.246 | <0.001 |
| COQ2          | <0.001 | 1.669 | 1.466~1.900 | <0.001 |
| RP11-401P9.4  | <0.001 | 0.769 | 0.720~0.822 | <0.001 |
| SSR3          | <0.001 | 1.537 | 1.381~1.711 | <0.001 |
| SLC4A2        | <0.001 | 1.323 | 1.234~1.418 | <0.001 |
| RP11-277L2.5  | <0.001 | 0.799 | 0.755~0.845 | <0.001 |
| RP11-158M2.3  | <0.001 | 0.774 | 0.726~0.825 | <0.001 |
| SLC30A5       | <0.001 | 1.746 | 1.527~1.997 | <0.001 |
| CTNNA3        | <0.001 | 0.614 | 0.546~0.691 | <0.001 |
| PRKCDBP       | <0.001 | 1.293 | 1.215~1.375 | <0.001 |
| KLHDC3        | <0.001 | 0.708 | 0.652~0.769 | <0.001 |
| SMAGP         | <0.001 | 1.522 | 1.377~1.683 | <0.001 |
| POLR3G        | <0.001 | 1.957 | 1.669~2.295 | <0.001 |
| FKBP11        | <0.001 | 1.445 | 1.324~1.576 | <0.001 |
| RFC4          | <0.001 | 1.508 | 1.368~1.662 | <0.001 |
| SOWAHA        | <0.001 | 0.733 | 0.681~0.789 | <0.001 |
| IL18BP        | <0.001 | 1.510 | 1.370~1.664 | <0.001 |
| NCF1          | <0.001 | 1.333 | 1.246~1.427 | <0.001 |

|               |        |       |             |        |
|---------------|--------|-------|-------------|--------|
| CBX6          | <0.001 | 0.601 | 0.533~0.678 | <0.001 |
| CCDC97        | <0.001 | 1.757 | 1.538~2.007 | <0.001 |
| TRIB1         | <0.001 | 1.495 | 1.360~1.643 | <0.001 |
| RP11-872D17.8 | <0.001 | 2.397 | 1.955~2.940 | <0.001 |
| TULP3         | <0.001 | 1.644 | 1.465~1.845 | <0.001 |
| PTGES3P1      | <0.001 | 1.341 | 1.253~1.435 | <0.001 |
| PACSIN1       | <0.001 | 0.823 | 0.787~0.861 | <0.001 |
| JUNB          | <0.001 | 1.274 | 1.205~1.347 | <0.001 |
| RP6-42F4.1    | <0.001 | 1.905 | 1.643~2.209 | <0.001 |
| SIKE1         | <0.001 | 1.553 | 1.404~1.718 | <0.001 |
| RP4-813D12.3  | <0.001 | 0.650 | 0.589~0.717 | <0.001 |
| FDFT1         | <0.001 | 0.702 | 0.647~0.760 | <0.001 |
| DHDDS         | <0.001 | 1.887 | 1.635~2.178 | <0.001 |
| TRIM21        | <0.001 | 1.583 | 1.427~1.755 | <0.001 |
| NFKB2         | <0.001 | 1.508 | 1.376~1.653 | <0.001 |
| NPHP1         | <0.001 | 1.683 | 1.499~1.891 | <0.001 |
| NEURL         | <0.001 | 0.741 | 0.693~0.792 | <0.001 |
| BIN3          | <0.001 | 1.959 | 1.687~2.276 | <0.001 |
| TTC38         | <0.001 | 1.751 | 1.545~1.983 | <0.001 |
| RNF149        | <0.001 | 1.562 | 1.415~1.724 | <0.001 |
| RP5-1021I20.1 | <0.001 | 0.611 | 0.548~0.682 | <0.001 |
| SLC9A1        | <0.001 | 1.628 | 1.462~1.813 | <0.001 |
| MAP10         | <0.001 | 2.089 | 1.776~2.457 | <0.001 |
| MAOB          | <0.001 | 1.231 | 1.176~1.289 | <0.001 |
| ACTA2         | <0.001 | 1.280 | 1.212~1.351 | <0.001 |
| PLEK          | <0.001 | 1.405 | 1.305~1.514 | <0.001 |
| GPR3          | <0.001 | 1.560 | 1.416~1.718 | <0.001 |
| TAGLN         | <0.001 | 1.249 | 1.190~1.311 | <0.001 |
| ASB13         | <0.001 | 0.749 | 0.704~0.798 | <0.001 |
| C20orf201     | <0.001 | 0.701 | 0.649~0.757 | <0.001 |
| KBTBD6        | <0.001 | 0.595 | 0.532~0.665 | <0.001 |
| HNRNPL        | <0.001 | 1.703 | 1.518~1.910 | <0.001 |
| STMN3         | <0.001 | 0.675 | 0.620~0.735 | <0.001 |
| DZIP1L        | <0.001 | 1.672 | 1.497~1.868 | <0.001 |
| ASAP3         | <0.001 | 1.544 | 1.406~1.695 | <0.001 |
| ANO5          | <0.001 | 0.553 | 0.487~0.628 | <0.001 |
| PDE8B         | <0.001 | 0.673 | 0.618~0.732 | <0.001 |
| FAM132B       | <0.001 | 1.391 | 1.296~1.492 | <0.001 |
| CHST1         | <0.001 | 0.747 | 0.702~0.795 | <0.001 |
| SERPINF1      | <0.001 | 1.334 | 1.255~1.418 | <0.001 |
| SLC30A6       | <0.001 | 2.385 | 1.985~2.866 | <0.001 |
| SNRPB         | <0.001 | 1.509 | 1.384~1.646 | <0.001 |
| RPIA          | <0.001 | 1.951 | 1.695~2.245 | <0.001 |
| TMEM248       | <0.001 | 1.782 | 1.578~2.011 | <0.001 |
| MFNG          | <0.001 | 1.490 | 1.371~1.621 | <0.001 |
| STX2          | <0.001 | 1.832 | 1.614~2.080 | <0.001 |
| DPP6          | <0.001 | 0.713 | 0.664~0.765 | <0.001 |
| NAGA          | <0.001 | 1.708 | 1.528~1.910 | <0.001 |
| CTB-25B13.12  | <0.001 | 1.563 | 1.424~1.715 | <0.001 |
| HDAC4         | <0.001 | 0.585 | 0.523~0.653 | <0.001 |
| FAM211B       | <0.001 | 0.701 | 0.651~0.754 | <0.001 |
| NTM           | <0.001 | 0.708 | 0.660~0.760 | <0.001 |

|               |        |       |             |        |
|---------------|--------|-------|-------------|--------|
| BCRP2         | <0.001 | 0.716 | 0.669~0.767 | <0.001 |
| MAST1         | <0.001 | 0.753 | 0.710~0.798 | <0.001 |
| RPS6KA1       | <0.001 | 1.588 | 1.446~1.744 | <0.001 |
| RGS9          | <0.001 | 0.713 | 0.666~0.764 | <0.001 |
| TOR1B         | <0.001 | 1.910 | 1.676~2.177 | <0.001 |
| TIFA          | <0.001 | 1.776 | 1.581~1.994 | <0.001 |
| RAB36         | <0.001 | 1.560 | 1.427~1.705 | <0.001 |
| TRIOBP        | <0.001 | 1.878 | 1.656~2.129 | <0.001 |
| CREB3L2       | <0.001 | 1.886 | 1.664~2.137 | <0.001 |
| RP11-448G15.3 | <0.001 | 2.015 | 1.755~2.313 | <0.001 |
| KIF20B        | <0.001 | 2.031 | 1.766~2.336 | <0.001 |
| MREG          | <0.001 | 1.484 | 1.373~1.604 | <0.001 |
| GABPB1        | <0.001 | 1.903 | 1.677~2.159 | <0.001 |
| ASPHD1        | <0.001 | 0.763 | 0.724~0.805 | <0.001 |
| RP11-47I22.1  | <0.001 | 0.581 | 0.523~0.647 | <0.001 |
| RP11-2E11.5   | <0.001 | 0.392 | 0.326~0.471 | <0.001 |
| CTB-175P5.4   | <0.001 | 1.832 | 1.627~2.062 | <0.001 |
| LRP4          | <0.001 | 0.703 | 0.656~0.753 | <0.001 |
| FBXW2         | <0.001 | 1.813 | 1.616~2.036 | <0.001 |
| CYR61         | <0.001 | 1.261 | 1.205~1.319 | <0.001 |
| GMEB1         | <0.001 | 2.347 | 1.990~2.769 | <0.001 |
| HS3ST3B1      | <0.001 | 1.470 | 1.365~1.584 | <0.001 |
| TMCO4         | <0.001 | 1.651 | 1.500~1.818 | <0.001 |
| CHRNA1        | <0.001 | 1.377 | 1.295~1.464 | <0.001 |
| LMO3          | <0.001 | 0.752 | 0.712~0.794 | <0.001 |
| BVES          | <0.001 | 1.705 | 1.540~1.886 | <0.001 |
| RP1-239B22.5  | <0.001 | 0.573 | 0.516~0.637 | <0.001 |
| AHR           | <0.001 | 1.506 | 1.396~1.625 | <0.001 |
| RP11-362F19.1 | <0.001 | 2.098 | 1.830~2.404 | <0.001 |
| IPO4          | <0.001 | 1.930 | 1.711~2.177 | <0.001 |
| ITGA1         | <0.001 | 1.554 | 1.433~1.684 | <0.001 |
| MOXD1         | <0.001 | 1.285 | 1.227~1.345 | <0.001 |
| EYA4          | <0.001 | 1.563 | 1.442~1.694 | <0.001 |
| NID1          | <0.001 | 1.442 | 1.351~1.540 | <0.001 |
| PUS7          | <0.001 | 1.928 | 1.719~2.162 | <0.001 |
| RP11-122A3.2  | <0.001 | 1.717 | 1.564~1.885 | <0.001 |
| HOXB2         | <0.001 | 1.408 | 1.331~1.489 | <0.001 |
| GEN1          | <0.001 | 1.789 | 1.626~1.967 | <0.001 |
| C11orf89      | <0.001 | 1.376 | 1.211~1.564 | <0.001 |
| GPR6          | <0.001 | 0.666 | 0.567~0.783 | <0.001 |
| PTF1A         | <0.001 | 0.322 | 0.205~0.504 | <0.001 |
| SH2D1A        | <0.001 | 1.856 | 1.470~2.343 | <0.001 |
| PPP2R2D       | <0.001 | 0.744 | 0.670~0.826 | <0.001 |
| MACC1         | <0.001 | 1.919 | 1.541~2.389 | <0.001 |
| GZMK          | <0.001 | 1.342 | 1.217~1.480 | <0.001 |
| C10orf55      | <0.001 | 1.390 | 1.246~1.551 | <0.001 |
| RP1-35C21.2   | <0.001 | 0.605 | 0.513~0.714 | <0.001 |
| C18orf32      | <0.001 | 0.866 | 0.826~0.908 | <0.001 |
| MYL12B        | <0.001 | 1.263 | 1.171~1.363 | <0.001 |
| SIT1          | <0.001 | 1.455 | 1.289~1.643 | <0.001 |
| TCERG1L       | <0.001 | 0.661 | 0.579~0.754 | <0.001 |
| RP11-278H7.1  | <0.001 | 0.254 | 0.164~0.392 | <0.001 |

|               |        |       |             |        |
|---------------|--------|-------|-------------|--------|
| KRT8          | <0.001 | 1.247 | 1.163~1.338 | <0.001 |
| ADAM29        | <0.001 | 0.310 | 0.214~0.449 | <0.001 |
| ATP5F1        | <0.001 | 1.316 | 1.207~1.434 | <0.001 |
| HIST1H2BG     | <0.001 | 1.117 | 1.080~1.156 | <0.001 |
| SYF2          | <0.001 | 1.384 | 1.253~1.529 | <0.001 |
| MMP1          | <0.001 | 1.314 | 1.210~1.428 | <0.001 |
| NR5A2         | <0.001 | 1.600 | 1.387~1.845 | <0.001 |
| GJA3          | <0.001 | 1.658 | 1.426~1.928 | <0.001 |
| RP11-153M7.1  | <0.001 | 1.495 | 1.327~1.685 | <0.001 |
| LDHB          | <0.001 | 0.845 | 0.804~0.888 | <0.001 |
| RP13-137A17.4 | <0.001 | 0.135 | 0.074~0.244 | <0.001 |
| GABARAPL2     | <0.001 | 0.830 | 0.786~0.877 | <0.001 |
| DMBX1         | <0.001 | 1.934 | 1.594~2.346 | <0.001 |
| EMC3          | <0.001 | 1.526 | 1.349~1.725 | <0.001 |
| GRM4          | <0.001 | 0.578 | 0.494~0.677 | <0.001 |
| IL2RB         | <0.001 | 1.573 | 1.381~1.793 | <0.001 |
| NDST4         | <0.001 | 0.258 | 0.175~0.381 | <0.001 |
| GS1-600G8.5   | <0.001 | 1.410 | 1.278~1.556 | <0.001 |
| TTL           | <0.001 | 1.679 | 1.449~1.945 | <0.001 |
| ENPP1         | <0.001 | 1.674 | 1.447~1.936 | <0.001 |
| RP11-416O18.1 | <0.001 | 1.895 | 1.582~2.270 | <0.001 |
| RAN           | <0.001 | 1.370 | 1.254~1.497 | <0.001 |
| B2M           | <0.001 | 1.232 | 1.162~1.307 | <0.001 |
| GLRA1         | <0.001 | 0.155 | 0.092~0.262 | <0.001 |
| C14orf119     | <0.001 | 1.481 | 1.327~1.653 | <0.001 |
| RQCD1         | <0.001 | 1.606 | 1.407~1.833 | <0.001 |
| UBQLN4        | <0.001 | 0.708 | 0.643~0.779 | <0.001 |
| C7orf73       | <0.001 | 1.426 | 1.293~1.572 | <0.001 |
| CARM1         | <0.001 | 1.515 | 1.351~1.698 | <0.001 |
| RPA2          | <0.001 | 1.483 | 1.331~1.653 | <0.001 |
| NKX6-3        | <0.001 | 0.348 | 0.261~0.465 | <0.001 |
| CLEC18C       | <0.001 | 1.353 | 1.245~1.469 | <0.001 |
| RP11-707M1.1  | <0.001 | 0.481 | 0.394~0.588 | <0.001 |
| KRT75         | <0.001 | 1.518 | 1.354~1.701 | <0.001 |
| FOXD2         | <0.001 | 1.551 | 1.376~1.749 | <0.001 |
| GPR157        | <0.001 | 1.453 | 1.313~1.608 | <0.001 |
| HMGGA2        | <0.001 | 1.315 | 1.221~1.417 | <0.001 |
| DLGAP2        | <0.001 | 0.525 | 0.441~0.624 | <0.001 |
| NKX1-2        | <0.001 | 0.160 | 0.098~0.263 | <0.001 |
| CCDC19        | <0.001 | 1.296 | 1.209~1.390 | <0.001 |
| WI2-81516E3.1 | <0.001 | 0.157 | 0.096~0.259 | <0.001 |
| SUSD5         | <0.001 | 0.765 | 0.712~0.822 | <0.001 |
| FAF1          | <0.001 | 1.798 | 1.536~2.105 | <0.001 |
| CD3E          | <0.001 | 1.329 | 1.231~1.434 | <0.001 |
| PLEKHS1       | <0.001 | 1.327 | 1.230~1.432 | <0.001 |
| ZNF474        | <0.001 | 1.663 | 1.451~1.905 | <0.001 |
| RHPN1-AS1     | <0.001 | 1.475 | 1.329~1.637 | <0.001 |
| SNX24         | <0.001 | 1.654 | 1.446~1.892 | <0.001 |
| CYP1A1        | <0.001 | 0.200 | 0.130~0.308 | <0.001 |
| EIF4E1B       | <0.001 | 0.591 | 0.513~0.680 | <0.001 |
| LOR           | <0.001 | 0.574 | 0.495~0.665 | <0.001 |
| SP6           | <0.001 | 1.527 | 1.364~1.710 | <0.001 |

|                |        |       |             |        |
|----------------|--------|-------|-------------|--------|
| RP5-1086K13.1  | <0.001 | 1.761 | 1.515~2.047 | <0.001 |
| NGRN           | <0.001 | 0.788 | 0.739~0.839 | <0.001 |
| SH2D2A         | <0.001 | 1.440 | 1.307~1.586 | <0.001 |
| COX15          | <0.001 | 0.674 | 0.607~0.748 | <0.001 |
| SP110          | <0.001 | 1.457 | 1.319~1.609 | <0.001 |
| HDDC2          | <0.001 | 0.794 | 0.747~0.844 | <0.001 |
| RP11-32B5.7    | <0.001 | 0.139 | 0.083~0.235 | <0.001 |
| SEPHS2         | <0.001 | 1.631 | 1.434~1.855 | <0.001 |
| HIST1H3H       | <0.001 | 1.145 | 1.105~1.187 | <0.001 |
| EBF2           | <0.001 | 1.771 | 1.525~2.058 | <0.001 |
| IL6            | <0.001 | 1.247 | 1.177~1.321 | <0.001 |
| IGHG2          | <0.001 | 1.132 | 1.096~1.169 | <0.001 |
| HSP90B1        | <0.001 | 1.383 | 1.271~1.506 | <0.001 |
| RP11-814P5.1   | <0.001 | 0.098 | 0.054~0.180 | <0.001 |
| RP11-986E7.7   | <0.001 | 1.345 | 1.245~1.452 | <0.001 |
| PREB           | <0.001 | 1.791 | 1.540~2.082 | <0.001 |
| MRPL32         | <0.001 | 1.457 | 1.323~1.606 | <0.001 |
| DERL2          | <0.001 | 1.564 | 1.394~1.755 | <0.001 |
| HEXB           | <0.001 | 1.357 | 1.254~1.467 | <0.001 |
| MTFR1L         | <0.001 | 1.684 | 1.473~1.925 | <0.001 |
| RBM38          | <0.001 | 1.479 | 1.338~1.635 | <0.001 |
| CXCL9          | <0.001 | 1.359 | 1.257~1.470 | <0.001 |
| C10orf32       | <0.001 | 0.754 | 0.701~0.810 | <0.001 |
| MGST2          | <0.001 | 1.416 | 1.296~1.548 | <0.001 |
| SLC9A2         | <0.001 | 0.197 | 0.130~0.298 | <0.001 |
| GALNTL6        | <0.001 | 0.470 | 0.387~0.569 | <0.001 |
| COL11A2        | <0.001 | 0.724 | 0.667~0.786 | <0.001 |
| FAM45A         | <0.001 | 0.706 | 0.646~0.771 | <0.001 |
| FKBP9L         | <0.001 | 1.476 | 1.337~1.629 | <0.001 |
| TCEAL5         | <0.001 | 0.812 | 0.771~0.856 | <0.001 |
| CTD-2555A7.2   | <0.001 | 0.392 | 0.309~0.497 | <0.001 |
| OAT            | <0.001 | 0.747 | 0.694~0.804 | <0.001 |
| ACO2           | <0.001 | 0.744 | 0.690~0.801 | <0.001 |
| HIST1H3E       | <0.001 | 1.225 | 1.164~1.289 | <0.001 |
| AC079210.1     | <0.001 | 3.660 | 2.640~5.075 | <0.001 |
| EIF3L          | <0.001 | 0.826 | 0.788~0.867 | <0.001 |
| AMER2-AS1      | <0.001 | 0.444 | 0.362~0.545 | <0.001 |
| IL15RA         | <0.001 | 1.516 | 1.365~1.683 | <0.001 |
| PQLC2          | <0.001 | 1.479 | 1.341~1.631 | <0.001 |
| PIIF           | <0.001 | 0.761 | 0.711~0.815 | <0.001 |
| RP11-481A20.10 | <0.001 | 0.564 | 0.489~0.651 | <0.001 |
| WTAP           | <0.001 | 1.440 | 1.314~1.577 | <0.001 |
| H2AFY          | <0.001 | 1.583 | 1.412~1.776 | <0.001 |
| WWTR1-AS1      | <0.001 | 1.618 | 1.435~1.824 | <0.001 |
| KCNT1          | <0.001 | 0.757 | 0.706~0.811 | <0.001 |
| NUCB1          | <0.001 | 1.493 | 1.351~1.649 | <0.001 |
| C22orf39       | <0.001 | 0.754 | 0.703~0.809 | <0.001 |
| LRTM2          | <0.001 | 0.722 | 0.665~0.782 | <0.001 |
| UBE2I          | <0.001 | 1.588 | 1.416~1.781 | <0.001 |
| C5orf15        | <0.001 | 1.504 | 1.360~1.664 | <0.001 |
| EPB41L4A-AS1   | <0.001 | 0.813 | 0.773~0.856 | <0.001 |
| SCAPER         | <0.001 | 0.684 | 0.623~0.752 | <0.001 |



|                  |        |       |             |        |
|------------------|--------|-------|-------------|--------|
| COL26A1          | <0.001 | 0.688 | 0.627~0.754 | <0.001 |
| BBS9             | <0.001 | 1.558 | 1.397~1.739 | <0.001 |
| ATP8A2           | <0.001 | 0.639 | 0.572~0.714 | <0.001 |
| MYO9B            | <0.001 | 1.450 | 1.323~1.590 | <0.001 |
| PABPC4L          | <0.001 | 2.457 | 1.969~3.067 | <0.001 |
| RP11-324H6.5     | <0.001 | 0.379 | 0.298~0.481 | <0.001 |
| EFNA1            | <0.001 | 1.428 | 1.308~1.559 | <0.001 |
| OPN3             | <0.001 | 1.465 | 1.333~1.609 | <0.001 |
| KB-1507C5.2      | <0.001 | 0.691 | 0.630~0.756 | <0.001 |
| NGLY1            | <0.001 | 1.663 | 1.467~1.884 | <0.001 |
| CCT6A            | <0.001 | 1.306 | 1.223~1.394 | <0.001 |
| GTF2B            | <0.001 | 1.605 | 1.429~1.802 | <0.001 |
| LYPLA1           | <0.001 | 1.511 | 1.365~1.672 | <0.001 |
| LPO              | <0.001 | 0.281 | 0.206~0.383 | <0.001 |
| TAP1             | <0.001 | 1.384 | 1.278~1.499 | <0.001 |
| IL2RG            | <0.001 | 1.366 | 1.266~1.474 | <0.001 |
| KHDRBS2          | <0.001 | 0.576 | 0.503~0.659 | <0.001 |
| PIGC             | <0.001 | 1.714 | 1.503~1.956 | <0.001 |
| TMEM107          | <0.001 | 1.600 | 1.426~1.794 | <0.001 |
| INPP1            | <0.001 | 0.763 | 0.714~0.815 | <0.001 |
| FAM149A          | <0.001 | 0.714 | 0.657~0.775 | <0.001 |
| HIST1H4H         | <0.001 | 1.164 | 1.121~1.207 | <0.001 |
| MINA             | <0.001 | 1.472 | 1.339~1.617 | <0.001 |
| CD70             | <0.001 | 1.345 | 1.251~1.445 | <0.001 |
| EVI5L            | <0.001 | 0.661 | 0.598~0.731 | <0.001 |
| EMR1             | <0.001 | 1.491 | 1.353~1.643 | <0.001 |
| VGLL2            | <0.001 | 1.586 | 1.418~1.774 | <0.001 |
| SLC26A4-AS1      | <0.001 | 0.749 | 0.698~0.803 | <0.001 |
| HAT1             | <0.001 | 1.586 | 1.418~1.773 | <0.001 |
| LINC00617        | <0.001 | 0.652 | 0.588~0.723 | <0.001 |
| RP11-453F18__B.1 | <0.001 | 1.816 | 1.572~2.099 | <0.001 |
| RTN3             | <0.001 | 0.797 | 0.754~0.842 | <0.001 |
| TRHDE-AS1        | <0.001 | 0.514 | 0.437~0.603 | <0.001 |
| AL009178.1       | <0.001 | 1.608 | 1.434~1.804 | <0.001 |
| RP11-728F11.4    | <0.001 | 0.625 | 0.557~0.700 | <0.001 |
| WARS             | <0.001 | 1.401 | 1.291~1.519 | <0.001 |
| TRAC             | <0.001 | 1.345 | 1.252~1.444 | <0.001 |
| MB21D2           | <0.001 | 0.602 | 0.532~0.680 | <0.001 |
| C20orf203        | <0.001 | 0.353 | 0.275~0.454 | <0.001 |
| POU6F1           | <0.001 | 0.682 | 0.622~0.748 | <0.001 |
| UBE2K            | <0.001 | 1.614 | 1.438~1.811 | <0.001 |
| OASL             | <0.001 | 1.380 | 1.277~1.492 | <0.001 |
| SMARCE1          | <0.001 | 1.484 | 1.350~1.632 | <0.001 |
| CCDC181          | <0.001 | 1.557 | 1.400~1.732 | <0.001 |
| GTF2E2           | <0.001 | 1.671 | 1.477~1.891 | <0.001 |
| MT-RNR1          | <0.001 | 0.913 | 0.894~0.933 | <0.001 |
| CCDC89           | <0.001 | 1.734 | 1.520~1.979 | <0.001 |
| RP11-479O17.10   | <0.001 | 0.033 | 0.015~0.075 | <0.001 |
| C7orf57          | <0.001 | 1.351 | 1.258~1.452 | <0.001 |
| MVP              | <0.001 | 1.413 | 1.301~1.534 | <0.001 |
| GNPDA1           | <0.001 | 1.719 | 1.510~1.956 | <0.001 |
| ASIC2            | <0.001 | 0.634 | 0.568~0.707 | <0.001 |

|               |        |       |             |        |
|---------------|--------|-------|-------------|--------|
| CTNNA1        | <0.001 | 1.661 | 1.472~1.875 | <0.001 |
| CTC-548K16.1  | <0.001 | 1.614 | 1.440~1.808 | <0.001 |
| MS4A4E        | <0.001 | 1.420 | 1.307~1.544 | <0.001 |
| MSX2          | <0.001 | 0.623 | 0.556~0.697 | <0.001 |
| HPD           | <0.001 | 1.383 | 1.280~1.493 | <0.001 |
| PSME4         | <0.001 | 1.671 | 1.479~1.888 | <0.001 |
| RP11-598F7.4  | <0.001 | 0.016 | 0.006~0.042 | <0.001 |
| S100A6        | <0.001 | 1.230 | 1.171~1.292 | <0.001 |
| AC145676.2    | <0.001 | 2.135 | 1.783~2.557 | <0.001 |
| MYO1E         | <0.001 | 1.426 | 1.311~1.552 | <0.001 |
| AC017002.1    | <0.001 | 2.431 | 1.969~3.001 | <0.001 |
| ACAA2         | <0.001 | 1.438 | 1.320~1.567 | <0.001 |
| TMEM201       | <0.001 | 1.814 | 1.575~2.088 | <0.001 |
| ZNF599        | <0.001 | 1.744 | 1.530~1.989 | <0.001 |
| RAB13         | <0.001 | 1.360 | 1.265~1.463 | <0.001 |
| TCTEX1D4      | <0.001 | 1.659 | 1.472~1.869 | <0.001 |
| JAK3          | <0.001 | 1.433 | 1.316~1.560 | <0.001 |
| CAPZB         | <0.001 | 1.529 | 1.383~1.690 | <0.001 |
| OR51E1        | <0.001 | 1.886 | 1.624~2.191 | <0.001 |
| TUBB          | <0.001 | 1.557 | 1.403~1.728 | <0.001 |
| GPRC5A        | <0.001 | 1.445 | 1.325~1.576 | <0.001 |
| TMEM230       | <0.001 | 1.440 | 1.322~1.569 | <0.001 |
| DEDD2         | <0.001 | 1.560 | 1.405~1.732 | <0.001 |
| SLC6A13       | <0.001 | 0.630 | 0.565~0.702 | <0.001 |
| CLEC12A       | <0.001 | 1.513 | 1.373~1.668 | <0.001 |
| TMEM209       | <0.001 | 1.621 | 1.447~1.816 | <0.001 |
| GEMIN7        | <0.001 | 1.570 | 1.412~1.745 | <0.001 |
| PRELID2       | <0.001 | 1.609 | 1.439~1.798 | <0.001 |
| RASSF1        | <0.001 | 1.731 | 1.522~1.968 | <0.001 |
| PRRT1         | <0.001 | 0.769 | 0.723~0.818 | <0.001 |
| ATP5SL        | <0.001 | 1.734 | 1.525~1.972 | <0.001 |
| HIST1H2AC     | <0.001 | 1.183 | 1.137~1.230 | <0.001 |
| RP11-314B1.2  | <0.001 | 0.369 | 0.292~0.465 | <0.001 |
| PAM           | <0.001 | 1.469 | 1.343~1.607 | <0.001 |
| CACNA1E       | <0.001 | 0.626 | 0.561~0.698 | <0.001 |
| VWC2L         | <0.001 | 0.481 | 0.406~0.571 | <0.001 |
| PSMA5         | <0.001 | 1.542 | 1.394~1.706 | <0.001 |
| NASP          | <0.001 | 1.488 | 1.356~1.632 | <0.001 |
| ATG4A         | <0.001 | 1.967 | 1.680~2.302 | <0.001 |
| LINC00319     | <0.001 | 0.327 | 0.252~0.424 | <0.001 |
| TUBG2         | <0.001 | 0.742 | 0.692~0.795 | <0.001 |
| SLC2A11       | <0.001 | 0.651 | 0.589~0.719 | <0.001 |
| AC124789.1    | <0.001 | 1.757 | 1.542~2.003 | <0.001 |
| FAM149B1      | <0.001 | 0.693 | 0.637~0.755 | <0.001 |
| CD69          | <0.001 | 1.435 | 1.319~1.560 | <0.001 |
| MED18         | <0.001 | 1.742 | 1.532~1.982 | <0.001 |
| ZNF691        | <0.001 | 1.600 | 1.435~1.784 | <0.001 |
| PTGDR2        | <0.001 | 0.493 | 0.418~0.580 | <0.001 |
| PIANP         | <0.001 | 0.787 | 0.745~0.832 | <0.001 |
| RP11-115L11.1 | <0.001 | 2.262 | 1.872~2.732 | <0.001 |
| LHFP          | <0.001 | 1.443 | 1.325~1.570 | <0.001 |
| HEBP2         | <0.001 | 1.505 | 1.369~1.654 | <0.001 |

|               |        |       |             |        |
|---------------|--------|-------|-------------|--------|
| TMSB10        | <0.001 | 1.263 | 1.197~1.333 | <0.001 |
| HMG2          | <0.001 | 1.382 | 1.282~1.489 | <0.001 |
| LINC00925     | <0.001 | 0.788 | 0.746~0.832 | <0.001 |
| C1orf54       | <0.001 | 1.402 | 1.297~1.516 | <0.001 |
| SMARCA1       | <0.001 | 2.234 | 1.855~2.690 | <0.001 |
| LINC00665     | <0.001 | 1.719 | 1.517~1.948 | <0.001 |
| RUFY1         | <0.001 | 1.852 | 1.606~2.135 | <0.001 |
| AC140912.1    | <0.001 | 0.481 | 0.406~0.569 | <0.001 |
| IFITM3        | <0.001 | 1.256 | 1.191~1.324 | <0.001 |
| MTERFD1       | <0.001 | 1.624 | 1.452~1.816 | <0.001 |
| PPP4R4        | <0.001 | 0.640 | 0.578~0.710 | <0.001 |
| RP11-508O18.1 | <0.001 | 0.106 | 0.063~0.177 | <0.001 |
| ADAMTS15      | <0.001 | 1.350 | 1.260~1.447 | <0.001 |
| TBC1D31       | <0.001 | 1.704 | 1.508~1.926 | <0.001 |
| AC093802.1    | <0.001 | 0.002 | 0.000~0.008 | <0.001 |
| AL512652.1    | <0.001 | 0.410 | 0.334~0.503 | <0.001 |
| ZNF662        | <0.001 | 1.512 | 1.375~1.662 | <0.001 |
| SCPEP1        | <0.001 | 1.501 | 1.367~1.647 | <0.001 |
| RP11-18J9.3   | <0.001 | 0.288 | 0.217~0.384 | <0.001 |
| CD40          | <0.001 | 1.558 | 1.408~1.725 | <0.001 |
| CYP17A1       | <0.001 | 0.356 | 0.281~0.451 | <0.001 |
| EHD2          | <0.001 | 1.397 | 1.294~1.509 | <0.001 |
| WDR78         | <0.001 | 1.372 | 1.276~1.474 | <0.001 |
| SAMD11        | <0.001 | 0.734 | 0.684~0.788 | <0.001 |
| CBLN2         | <0.001 | 0.713 | 0.660~0.770 | <0.001 |
| RBPMS         | <0.001 | 1.393 | 1.291~1.503 | <0.001 |
| RAP1A         | <0.001 | 1.492 | 1.361~1.634 | <0.001 |
| VWC2          | <0.001 | 0.461 | 0.386~0.550 | <0.001 |
| TMEM257       | <0.001 | 0.601 | 0.535~0.675 | <0.001 |
| HBQ1          | <0.001 | 0.750 | 0.702~0.801 | <0.001 |
| LEFTY2        | <0.001 | 1.312 | 1.233~1.395 | <0.001 |
| TP73          | <0.001 | 1.386 | 1.287~1.494 | <0.001 |
| AKAP8         | <0.001 | 1.924 | 1.657~2.233 | <0.001 |
| PTMA          | <0.001 | 1.578 | 1.422~1.751 | <0.001 |
| LPAR6         | <0.001 | 1.410 | 1.304~1.524 | <0.001 |
| LRRC36        | <0.001 | 1.608 | 1.443~1.792 | <0.001 |
| CTC-458G6.2   | <0.001 | 0.327 | 0.254~0.422 | <0.001 |
| OST4          | <0.001 | 1.484 | 1.356~1.623 | <0.001 |
| IDI1          | <0.001 | 0.770 | 0.725~0.817 | <0.001 |
| DLL3          | <0.001 | 0.859 | 0.830~0.889 | <0.001 |
| RP11-290F20.1 | <0.001 | 1.961 | 1.683~2.285 | <0.001 |
| BTN2A1        | <0.001 | 1.756 | 1.545~1.996 | <0.001 |
| MGP           | <0.001 | 1.187 | 1.142~1.234 | <0.001 |
| SLC35C1       | <0.001 | 1.863 | 1.618~2.145 | <0.001 |
| MEN1          | <0.001 | 1.893 | 1.638~2.189 | <0.001 |
| LINC00671     | <0.001 | 0.307 | 0.235~0.402 | <0.001 |
| HKR1          | <0.001 | 1.780 | 1.562~2.029 | <0.001 |
| RAPGEFL1      | <0.001 | 0.700 | 0.645~0.759 | <0.001 |
| DNAJB11       | <0.001 | 1.448 | 1.332~1.575 | <0.001 |
| ANKRD46       | <0.001 | 0.680 | 0.623~0.742 | <0.001 |
| SNX32         | <0.001 | 0.675 | 0.618~0.738 | <0.001 |
| MSMP          | <0.001 | 1.186 | 1.141~1.233 | <0.001 |

|                |        |       |             |        |
|----------------|--------|-------|-------------|--------|
| RP11-1017G21.6 | <0.001 | 0.591 | 0.525~0.666 | <0.001 |
| BEX2           | <0.001 | 0.814 | 0.777~0.853 | <0.001 |
| GPATCH1        | <0.001 | 2.038 | 1.735~2.393 | <0.001 |
| TCTE1          | <0.001 | 0.531 | 0.460~0.612 | <0.001 |
| RP11-395B7.7   | <0.001 | 1.555 | 1.408~1.718 | <0.001 |
| SHANK1         | <0.001 | 0.747 | 0.699~0.798 | <0.001 |
| EFEMP2         | <0.001 | 1.292 | 1.219~1.369 | <0.001 |
| C2orf27A       | <0.001 | 0.736 | 0.686~0.788 | <0.001 |
| STAR           | <0.001 | 0.488 | 0.415~0.573 | <0.001 |
| RRBP1          | <0.001 | 1.535 | 1.394~1.691 | <0.001 |
| CGREF1         | <0.001 | 0.740 | 0.691~0.792 | <0.001 |
| IFI44          | <0.001 | 1.327 | 1.245~1.415 | <0.001 |
| HIST1H2BD      | <0.001 | 1.190 | 1.144~1.237 | <0.001 |
| AC003986.6     | <0.001 | 2.758 | 2.195~3.466 | <0.001 |
| B3GNT1         | <0.001 | 0.711 | 0.658~0.767 | <0.001 |
| CBFA2T3        | <0.001 | 0.585 | 0.518~0.660 | <0.001 |
| OLFM4          | <0.001 | 0.353 | 0.279~0.446 | <0.001 |
| RAI2           | <0.001 | 0.633 | 0.571~0.701 | <0.001 |
| INPP5A         | <0.001 | 0.617 | 0.553~0.688 | <0.001 |
| CTD-2081K17.2  | <0.001 | 0.692 | 0.637~0.751 | <0.001 |
| CHD3           | <0.001 | 0.670 | 0.612~0.733 | <0.001 |
| GGTA1P         | <0.001 | 0.796 | 0.756~0.838 | <0.001 |
| IGFN1          | <0.001 | 0.752 | 0.706~0.802 | <0.001 |
| PLEKHA6        | <0.001 | 0.666 | 0.608~0.730 | <0.001 |
| IL10RB-AS1     | <0.001 | 1.863 | 1.620~2.142 | <0.001 |
| FUCA1          | <0.001 | 1.459 | 1.341~1.589 | <0.001 |
| NPLOC4         | <0.001 | 2.269 | 1.887~2.727 | <0.001 |
| RP11-838N2.4   | <0.001 | 1.609 | 1.446~1.790 | <0.001 |
| CD48           | <0.001 | 1.345 | 1.259~1.438 | <0.001 |
| PTPN9          | <0.001 | 1.696 | 1.507~1.910 | <0.001 |
| BTN3A2         | <0.001 | 1.424 | 1.315~1.541 | <0.001 |
| AC012593.1     | <0.001 | 0.291 | 0.220~0.384 | <0.001 |
| CCDC102A       | <0.001 | 1.539 | 1.397~1.695 | <0.001 |
| COL15A1        | <0.001 | 1.417 | 1.311~1.532 | <0.001 |
| PELO           | <0.001 | 1.820 | 1.592~2.082 | <0.001 |
| PWAR6          | <0.001 | 0.750 | 0.703~0.800 | <0.001 |
| HSPBAP1        | <0.001 | 1.704 | 1.512~1.919 | <0.001 |
| RUNX3          | <0.001 | 1.515 | 1.381~1.662 | <0.001 |
| ZCCHC9         | <0.001 | 1.669 | 1.488~1.871 | <0.001 |
| MX2            | <0.001 | 1.391 | 1.292~1.497 | <0.001 |
| ZNF644         | <0.001 | 1.722 | 1.525~1.944 | <0.001 |
| LMNA           | <0.001 | 1.391 | 1.292~1.498 | <0.001 |
| ZNF480         | <0.001 | 1.702 | 1.512~1.916 | <0.001 |
| GSTK1          | <0.001 | 1.632 | 1.463~1.820 | <0.001 |
| SCLT1          | <0.001 | 1.740 | 1.538~1.969 | <0.001 |
| AC009014.3     | <0.001 | 0.575 | 0.508~0.650 | <0.001 |
| GLRX           | <0.001 | 1.409 | 1.306~1.521 | <0.001 |
| FAM131C        | <0.001 | 0.715 | 0.664~0.771 | <0.001 |
| ERMAP          | <0.001 | 1.825 | 1.596~2.087 | <0.001 |
| RPL13AP20      | <0.001 | 1.602 | 1.442~1.779 | <0.001 |
| FAM19A3        | <0.001 | 1.656 | 1.480~1.853 | <0.001 |
| PSENNEN        | <0.001 | 1.487 | 1.362~1.624 | <0.001 |

|               |        |       |             |        |
|---------------|--------|-------|-------------|--------|
| RSPH4A        | <0.001 | 1.512 | 1.379~1.658 | <0.001 |
| GS1-18A18.1   | <0.001 | 0.184 | 0.126~0.268 | <0.001 |
| LYPLA2        | <0.001 | 1.578 | 1.426~1.747 | <0.001 |
| PDCL3         | <0.001 | 1.636 | 1.467~1.825 | <0.001 |
| PXN           | <0.001 | 1.628 | 1.461~1.814 | <0.001 |
| C2orf82       | <0.001 | 0.812 | 0.775~0.850 | <0.001 |
| FCER1G        | <0.001 | 1.274 | 1.208~1.345 | <0.001 |
| CTSF          | <0.001 | 0.712 | 0.660~0.767 | <0.001 |
| VAMP2         | <0.001 | 0.752 | 0.706~0.801 | <0.001 |
| RP11-20I20.4  | <0.001 | 1.408 | 1.305~1.519 | <0.001 |
| GCH1          | <0.001 | 1.788 | 1.572~2.033 | <0.001 |
| RP11-169D4.1  | <0.001 | 0.074 | 0.042~0.132 | <0.001 |
| INSM2         | <0.001 | 0.399 | 0.326~0.489 | <0.001 |
| MAPKAPK2      | <0.001 | 1.766 | 1.557~2.003 | <0.001 |
| FBXO39        | <0.001 | 1.936 | 1.673~2.241 | <0.001 |
| TEX40         | <0.001 | 0.749 | 0.702~0.798 | <0.001 |
| LINC00996     | <0.001 | 0.167 | 0.113~0.248 | <0.001 |
| FAM206A       | <0.001 | 1.764 | 1.556~2.000 | <0.001 |
| OSTM1         | <0.001 | 1.782 | 1.568~2.024 | <0.001 |
| SUSD1         | <0.001 | 1.770 | 1.561~2.008 | <0.001 |
| IFRD1         | <0.001 | 1.649 | 1.476~1.841 | <0.001 |
| TSPYL2        | <0.001 | 0.727 | 0.678~0.780 | <0.001 |
| RP11-327F22.2 | <0.001 | 3.675 | 2.759~4.896 | <0.001 |
| SLC2A9        | <0.001 | 1.775 | 1.564~2.014 | <0.001 |
| AIM1          | <0.001 | 1.573 | 1.423~1.737 | <0.001 |
| MAST2         | <0.001 | 1.820 | 1.595~2.076 | <0.001 |
| PAQR6         | <0.001 | 0.790 | 0.750~0.832 | <0.001 |
| ADAMDEC1      | <0.001 | 1.406 | 1.304~1.515 | <0.001 |
| FAM222A       | <0.001 | 0.752 | 0.706~0.801 | <0.001 |
| HSPB7         | <0.001 | 1.512 | 1.380~1.656 | <0.001 |
| RHBDF1        | <0.001 | 1.418 | 1.313~1.532 | <0.001 |
| LOXL4         | <0.001 | 1.387 | 1.291~1.490 | <0.001 |
| MYOD1         | <0.001 | 0.403 | 0.330~0.492 | <0.001 |
| GLRA3         | <0.001 | 0.481 | 0.410~0.565 | <0.001 |
| GGH           | <0.001 | 1.453 | 1.338~1.577 | <0.001 |
| FAM134A       | <0.001 | 0.590 | 0.525~0.662 | <0.001 |
| C1QC          | <0.001 | 1.298 | 1.226~1.374 | <0.001 |
| PODNL1        | <0.001 | 1.291 | 1.221~1.365 | <0.001 |
| RAB33A        | <0.001 | 0.756 | 0.711~0.804 | <0.001 |
| LACTB2        | <0.001 | 1.555 | 1.412~1.713 | <0.001 |
| HAUS1         | <0.001 | 1.566 | 1.420~1.728 | <0.001 |
| RP11-690D19.3 | <0.001 | 0.567 | 0.501~0.642 | <0.001 |
| VDR           | <0.001 | 1.772 | 1.564~2.009 | <0.001 |
| CALY          | <0.001 | 0.844 | 0.813~0.876 | <0.001 |
| DRAM2         | <0.001 | 1.540 | 1.401~1.693 | <0.001 |
| AKR1C2        | <0.001 | 0.622 | 0.560~0.690 | <0.001 |
| TAX1BP3       | <0.001 | 1.608 | 1.449~1.784 | <0.001 |
| CCDC125       | <0.001 | 2.030 | 1.739~2.371 | <0.001 |
| CTSA          | <0.001 | 1.582 | 1.431~1.749 | <0.001 |
| ZC3H12A       | <0.001 | 1.487 | 1.363~1.622 | <0.001 |
| MXRA7         | <0.001 | 1.486 | 1.363~1.620 | <0.001 |
| HSPD1P6       | <0.001 | 1.989 | 1.711~2.312 | <0.001 |

|               |        |       |             |        |
|---------------|--------|-------|-------------|--------|
| ZNF613        | <0.001 | 2.055 | 1.755~2.405 | <0.001 |
| SEC22A        | <0.001 | 1.759 | 1.554~1.989 | <0.001 |
| GJD2          | <0.001 | 0.412 | 0.339~0.500 | <0.001 |
| HTR1A         | <0.001 | 0.544 | 0.476~0.621 | <0.001 |
| FAM136A       | <0.001 | 1.816 | 1.594~2.069 | <0.001 |
| AP1S2         | <0.001 | 1.493 | 1.368~1.630 | <0.001 |
| SAA2          | <0.001 | 1.188 | 1.144~1.233 | <0.001 |
| RP11-268P4.5  | <0.001 | 0.662 | 0.606~0.725 | <0.001 |
| CFH           | <0.001 | 1.327 | 1.248~1.411 | <0.001 |
| HPSE2         | <0.001 | 0.607 | 0.544~0.677 | <0.001 |
| TRIP10        | <0.001 | 1.514 | 1.383~1.657 | <0.001 |
| STK32B        | <0.001 | 1.402 | 1.303~1.509 | <0.001 |
| USP30-AS1     | <0.001 | 1.665 | 1.490~1.860 | <0.001 |
| LEPROT        | <0.001 | 1.643 | 1.475~1.831 | <0.001 |
| LMAN2L        | <0.001 | 1.919 | 1.665~2.211 | <0.001 |
| TXNDC12       | <0.001 | 1.566 | 1.420~1.726 | <0.001 |
| SLC17A9       | <0.001 | 1.527 | 1.393~1.675 | <0.001 |
| RFC2          | <0.001 | 1.599 | 1.444~1.771 | <0.001 |
| NFYC          | <0.001 | 1.804 | 1.587~2.051 | <0.001 |
| FOXD1         | <0.001 | 1.386 | 1.291~1.488 | <0.001 |
| FAM26F        | <0.001 | 1.358 | 1.271~1.451 | <0.001 |
| RP11-219G17.4 | <0.001 | 2.061 | 1.761~2.411 | <0.001 |
| AKT2          | <0.001 | 1.607 | 1.450~1.781 | <0.001 |
| PTK7          | <0.001 | 1.489 | 1.366~1.623 | <0.001 |
| SPTBN4        | <0.001 | 0.699 | 0.647~0.755 | <0.001 |
| ENG           | <0.001 | 1.420 | 1.316~1.532 | <0.001 |
| STRA6         | <0.001 | 1.410 | 1.309~1.519 | <0.001 |
| CCR5          | <0.001 | 1.559 | 1.416~1.716 | <0.001 |
| MATK          | <0.001 | 0.736 | 0.688~0.786 | <0.001 |
| TMEM39B       | <0.001 | 1.768 | 1.563~2.000 | <0.001 |
| YIPF1         | <0.001 | 1.786 | 1.576~2.025 | <0.001 |
| MADD          | <0.001 | 0.654 | 0.596~0.716 | <0.001 |
| ZNF684        | <0.001 | 2.142 | 1.817~2.526 | <0.001 |
| CLDN7         | <0.001 | 1.594 | 1.441~1.763 | <0.001 |
| HAND2         | <0.001 | 1.408 | 1.308~1.516 | <0.001 |
| TRIT1         | <0.001 | 1.751 | 1.552~1.976 | <0.001 |
| ARHGAP25      | <0.001 | 1.632 | 1.469~1.814 | <0.001 |
| NKG2-E        | <0.001 | 0.774 | 0.733~0.818 | <0.001 |
| CTD-2545M3.8  | <0.001 | 0.727 | 0.679~0.779 | <0.001 |
| PHACTR3       | <0.001 | 0.782 | 0.741~0.824 | <0.001 |
| RP3-439F8.1   | <0.001 | 2.400 | 1.987~2.899 | <0.001 |
| LILRB3        | <0.001 | 1.421 | 1.317~1.533 | <0.001 |
| GALNT9        | <0.001 | 0.783 | 0.743~0.826 | <0.001 |
| NUP54         | <0.001 | 2.114 | 1.799~2.484 | <0.001 |
| ALOX5         | <0.001 | 1.325 | 1.247~1.408 | <0.001 |
| STIM2         | <0.001 | 1.703 | 1.519~1.910 | <0.001 |
| COL8A2        | <0.001 | 1.429 | 1.323~1.543 | <0.001 |
| ZNF568        | <0.001 | 1.781 | 1.573~2.017 | <0.001 |
| DDB2          | <0.001 | 1.460 | 1.345~1.583 | <0.001 |
| KLHL32        | <0.001 | 0.691 | 0.638~0.748 | <0.001 |
| CLIC2         | <0.001 | 1.754 | 1.554~1.979 | <0.001 |
| AC092295.7    | <0.001 | 1.858 | 1.626~2.123 | <0.001 |

|               |        |       |             |        |
|---------------|--------|-------|-------------|--------|
| C9orf89       | <0.001 | 1.408 | 1.308~1.515 | <0.001 |
| MTF2          | <0.001 | 1.742 | 1.546~1.962 | <0.001 |
| BDKRB2        | <0.001 | 1.647 | 1.480~1.834 | <0.001 |
| AOX1          | <0.001 | 1.799 | 1.586~2.041 | <0.001 |
| RP3-525N10.2  | <0.001 | 0.790 | 0.751~0.831 | <0.001 |
| KCNAB1        | <0.001 | 0.623 | 0.563~0.690 | <0.001 |
| OAS1          | <0.001 | 1.347 | 1.264~1.436 | <0.001 |
| C15orf48      | <0.001 | 1.346 | 1.263~1.435 | <0.001 |
| WBP1LP2       | <0.001 | 2.914 | 2.316~3.665 | <0.001 |
| NUP37         | <0.001 | 1.816 | 1.598~2.064 | <0.001 |
| OMA1          | <0.001 | 1.887 | 1.647~2.162 | <0.001 |
| CUBN          | <0.001 | 2.336 | 1.948~2.803 | <0.001 |
| SECTM1        | <0.001 | 1.381 | 1.288~1.480 | <0.001 |
| C1orf112      | <0.001 | 1.800 | 1.587~2.041 | <0.001 |
| GNRHR2        | <0.001 | 0.539 | 0.472~0.615 | <0.001 |
| SMIM10        | <0.001 | 1.490 | 1.368~1.622 | <0.001 |
| EOGT          | <0.001 | 1.845 | 1.618~2.103 | <0.001 |
| SKINTL        | <0.001 | 1.799 | 1.587~2.040 | <0.001 |
| CELF4         | <0.001 | 0.777 | 0.736~0.820 | <0.001 |
| ZNF585A       | <0.001 | 1.841 | 1.616~2.098 | <0.001 |
| PARP15        | <0.001 | 2.090 | 1.785~2.447 | <0.001 |
| ZFP36         | <0.001 | 1.272 | 1.208~1.339 | <0.001 |
| ZCCHC11       | <0.001 | 1.502 | 1.377~1.639 | <0.001 |
| TUBG1         | <0.001 | 1.638 | 1.474~1.821 | <0.001 |
| RP11-106M7.1  | <0.001 | 0.238 | 0.175~0.324 | <0.001 |
| GRID1         | <0.001 | 0.709 | 0.659~0.763 | <0.001 |
| RP11-19E11.1  | <0.001 | 1.428 | 1.323~1.541 | <0.001 |
| PSMD11        | <0.001 | 1.886 | 1.647~2.159 | <0.001 |
| TCEANC2       | <0.001 | 2.099 | 1.792~2.460 | <0.001 |
| MCM6          | <0.001 | 1.624 | 1.464~1.802 | <0.001 |
| CALHM2        | <0.001 | 1.668 | 1.495~1.860 | <0.001 |
| CSNK1G2       | <0.001 | 1.915 | 1.667~2.199 | <0.001 |
| COPB1         | <0.001 | 1.349 | 1.266~1.438 | <0.001 |
| PCSK1N        | <0.001 | 0.834 | 0.802~0.867 | <0.001 |
| LINC00475     | <0.001 | 1.386 | 1.293~1.486 | <0.001 |
| GPR61         | <0.001 | 0.549 | 0.483~0.623 | <0.001 |
| ADAM22        | <0.001 | 0.679 | 0.626~0.738 | <0.001 |
| PIFO          | <0.001 | 1.312 | 1.238~1.390 | <0.001 |
| 15-Sep        | <0.001 | 1.508 | 1.382~1.646 | <0.001 |
| SNAP25-AS1    | <0.001 | 0.548 | 0.483~0.623 | <0.001 |
| RP11-218E20.3 | <0.001 | 2.110 | 1.800~2.473 | <0.001 |
| YBX1          | <0.001 | 1.417 | 1.316~1.526 | <0.001 |
| TNFSF14       | <0.001 | 1.522 | 1.392~1.665 | <0.001 |
| WRAP73        | <0.001 | 1.840 | 1.616~2.095 | <0.001 |
| LGALS1        | <0.001 | 1.285 | 1.218~1.356 | <0.001 |
| CDCP1         | <0.001 | 1.610 | 1.455~1.781 | <0.001 |
| NOP14         | <0.001 | 2.248 | 1.892~2.670 | <0.001 |
| EDEM1         | <0.001 | 1.702 | 1.520~1.906 | <0.001 |
| NR3C2         | <0.001 | 0.559 | 0.494~0.632 | <0.001 |
| LA16c-380H5.5 | <0.001 | 0.597 | 0.535~0.666 | <0.001 |
| FRRS1         | <0.001 | 2.207 | 1.865~2.611 | <0.001 |
| FAM120AOS     | <0.001 | 1.773 | 1.570~2.002 | <0.001 |

|               |        |       |             |        |
|---------------|--------|-------|-------------|--------|
| CACNA2D2      | <0.001 | 0.584 | 0.521~0.655 | <0.001 |
| ABLIM3        | <0.001 | 0.704 | 0.654~0.759 | <0.001 |
| CD300LG       | <0.001 | 0.237 | 0.175~0.321 | <0.001 |
| PARP12        | <0.001 | 1.520 | 1.391~1.661 | <0.001 |
| WBP2          | <0.001 | 0.728 | 0.680~0.778 | <0.001 |
| TOX           | <0.001 | 0.675 | 0.621~0.734 | <0.001 |
| CACNA1I       | <0.001 | 0.541 | 0.474~0.616 | <0.001 |
| TMEM154       | <0.001 | 2.129 | 1.814~2.499 | <0.001 |
| RFPL1S        | <0.001 | 0.668 | 0.613~0.728 | <0.001 |
| TBX19         | <0.001 | 1.675 | 1.502~1.868 | <0.001 |
| FAM167A       | <0.001 | 0.717 | 0.668~0.769 | <0.001 |
| GAPT          | <0.001 | 1.547 | 1.411~1.697 | <0.001 |
| ELAVL2        | <0.001 | 0.698 | 0.647~0.753 | <0.001 |
| USP48         | <0.001 | 1.857 | 1.629~2.116 | <0.001 |
| GBP5          | <0.001 | 1.418 | 1.317~1.527 | <0.001 |
| GPHN          | <0.001 | 0.705 | 0.655~0.759 | <0.001 |
| GALE          | <0.001 | 1.697 | 1.518~1.898 | <0.001 |
| GDF10         | <0.001 | 0.636 | 0.578~0.700 | <0.001 |
| DFFA          | <0.001 | 2.224 | 1.878~2.632 | <0.001 |
| ZNF571        | <0.001 | 1.817 | 1.602~2.061 | <0.001 |
| KLHL25        | <0.001 | 0.671 | 0.617~0.730 | <0.001 |
| IRAK1         | <0.001 | 1.785 | 1.580~2.018 | <0.001 |
| GPRC5B        | <0.001 | 0.735 | 0.689~0.784 | <0.001 |
| SNCG          | <0.001 | 0.834 | 0.803~0.867 | <0.001 |
| GPN1          | <0.001 | 1.807 | 1.595~2.047 | <0.001 |
| DGCR10        | <0.001 | 0.603 | 0.542~0.671 | <0.001 |
| PSTPIP1       | <0.001 | 0.765 | 0.723~0.810 | <0.001 |
| ARF6          | <0.001 | 1.612 | 1.457~1.782 | <0.001 |
| UAP1          | <0.001 | 1.652 | 1.486~1.837 | <0.001 |
| NFKBIB        | <0.001 | 1.746 | 1.552~1.963 | <0.001 |
| LAMA4         | <0.001 | 1.396 | 1.301~1.498 | <0.001 |
| RP11-54O7.3   | <0.001 | 0.671 | 0.617~0.730 | <0.001 |
| LRRC66        | <0.001 | 1.686 | 1.511~1.882 | <0.001 |
| TRPM8         | <0.001 | 1.329 | 1.252~1.411 | <0.001 |
| RP11-343J3.2  | <0.001 | 0.580 | 0.517~0.650 | <0.001 |
| TMEM8A        | <0.001 | 1.647 | 1.483~1.829 | <0.001 |
| RP11-543C4.1  | <0.001 | 0.282 | 0.216~0.368 | <0.001 |
| FAM81A        | <0.001 | 0.671 | 0.617~0.730 | <0.001 |
| PLVAP         | <0.001 | 1.278 | 1.214~1.345 | <0.001 |
| RAB6B         | <0.001 | 0.702 | 0.652~0.756 | <0.001 |
| RP11-1C8.4    | <0.001 | 0.416 | 0.346~0.500 | <0.001 |
| PANX2         | <0.001 | 0.688 | 0.636~0.744 | <0.001 |
| HTR2A         | <0.001 | 0.564 | 0.500~0.636 | <0.001 |
| HLA-DMA       | <0.001 | 1.307 | 1.235~1.382 | <0.001 |
| PEA15         | <0.001 | 0.736 | 0.690~0.785 | <0.001 |
| VIPR2         | <0.001 | 0.782 | 0.743~0.823 | <0.001 |
| BCL2A1        | <0.001 | 1.309 | 1.237~1.385 | <0.001 |
| DNMBP-AS1     | <0.001 | 0.324 | 0.255~0.410 | <0.001 |
| ZNF700        | <0.001 | 1.854 | 1.629~2.111 | <0.001 |
| RP11-295G20.2 | <0.001 | 1.629 | 1.471~1.805 | <0.001 |
| C11orf84      | <0.001 | 1.777 | 1.575~2.004 | <0.001 |
| PIF1          | <0.001 | 1.520 | 1.392~1.659 | <0.001 |



|                |        |       |             |        |
|----------------|--------|-------|-------------|--------|
| DNAJC1         | <0.001 | 1.858 | 1.632~2.115 | <0.001 |
| OSBPL9         | <0.001 | 1.650 | 1.486~1.833 | <0.001 |
| GNL2           | <0.001 | 1.454 | 1.345~1.573 | <0.001 |
| F2RL2          | <0.001 | 1.568 | 1.427~1.722 | <0.001 |
| CPA4           | <0.001 | 1.577 | 1.434~1.735 | <0.001 |
| TYMP           | <0.001 | 1.219 | 1.170~1.271 | <0.001 |
| TMEM59L        | <0.001 | 0.777 | 0.737~0.819 | <0.001 |
| TMOD2          | <0.001 | 0.698 | 0.647~0.753 | <0.001 |
| TPRG1          | <0.001 | 1.774 | 1.574~2.000 | <0.001 |
| HMG20B         | <0.001 | 1.588 | 1.442~1.749 | <0.001 |
| MYO16          | <0.001 | 0.589 | 0.527~0.658 | <0.001 |
| IGIP           | <0.001 | 0.706 | 0.657~0.760 | <0.001 |
| C17orf96       | <0.001 | 0.682 | 0.630~0.739 | <0.001 |
| SLC34A2        | <0.001 | 1.625 | 1.468~1.798 | <0.001 |
| CEBPD          | <0.001 | 1.310 | 1.238~1.386 | <0.001 |
| TRAM1          | <0.001 | 1.426 | 1.324~1.535 | <0.001 |
| TOR3A          | <0.001 | 1.993 | 1.726~2.302 | <0.001 |
| HERC5          | <0.001 | 1.522 | 1.394~1.661 | <0.001 |
| HDAC11         | <0.001 | 0.666 | 0.612~0.725 | <0.001 |
| UCP2           | <0.001 | 1.364 | 1.279~1.455 | <0.001 |
| SMC5           | <0.001 | 1.639 | 1.479~1.817 | <0.001 |
| ARHGDIB        | <0.001 | 1.387 | 1.295~1.485 | <0.001 |
| 11-Mar         | <0.001 | 0.593 | 0.532~0.661 | <0.001 |
| NABP1          | <0.001 | 1.467 | 1.354~1.589 | <0.001 |
| HAPLN1         | <0.001 | 0.716 | 0.667~0.767 | <0.001 |
| NRP1           | <0.001 | 1.416 | 1.317~1.523 | <0.001 |
| TCEAL2         | <0.001 | 0.818 | 0.785~0.853 | <0.001 |
| LUCAT1         | <0.001 | 1.739 | 1.550~1.952 | <0.001 |
| RBM47          | <0.001 | 1.475 | 1.360~1.599 | <0.001 |
| SCP2           | <0.001 | 1.524 | 1.396~1.663 | <0.001 |
| TOM1L2         | <0.001 | 0.622 | 0.564~0.687 | <0.001 |
| ZNF586         | <0.001 | 2.454 | 2.036~2.957 | <0.001 |
| CD164          | <0.001 | 1.531 | 1.401~1.672 | <0.001 |
| ARHGEF19       | <0.001 | 1.616 | 1.463~1.785 | <0.001 |
| RP11-680F20.11 | <0.001 | 0.423 | 0.354~0.506 | <0.001 |
| GBP2           | <0.001 | 1.258 | 1.199~1.319 | <0.001 |
| PDGFD          | <0.001 | 1.484 | 1.367~1.611 | <0.001 |
| FBXL15         | <0.001 | 0.730 | 0.684~0.779 | <0.001 |
| CRLF1          | <0.001 | 0.805 | 0.769~0.842 | <0.001 |
| KCTD4          | <0.001 | 0.655 | 0.600~0.715 | <0.001 |
| KCNC2          | <0.001 | 0.715 | 0.667~0.766 | <0.001 |
| LINC00320      | <0.001 | 0.733 | 0.688~0.782 | <0.001 |
| SIGLEC7        | <0.001 | 1.484 | 1.367~1.610 | <0.001 |
| NRM            | <0.001 | 1.455 | 1.347~1.573 | <0.001 |
| BEX1           | <0.001 | 0.827 | 0.795~0.860 | <0.001 |
| TWSG1          | <0.001 | 1.473 | 1.360~1.596 | <0.001 |
| PHYHIP         | <0.001 | 0.792 | 0.755~0.831 | <0.001 |
| CEND1          | <0.001 | 0.787 | 0.749~0.827 | <0.001 |
| RP11-261N11.8  | <0.001 | 0.247 | 0.185~0.330 | <0.001 |
| PDIA3          | <0.001 | 1.678 | 1.507~1.867 | <0.001 |
| PABPC1L        | <0.001 | 1.406 | 1.311~1.509 | <0.001 |
| GPN2           | <0.001 | 2.231 | 1.890~2.633 | <0.001 |

|               |        |       |             |        |
|---------------|--------|-------|-------------|--------|
| HIST1H4I      | <0.001 | 1.433 | 1.330~1.543 | <0.001 |
| SNAP25        | <0.001 | 0.834 | 0.804~0.866 | <0.001 |
| IRAK4         | <0.001 | 1.909 | 1.670~2.182 | <0.001 |
| CYP46A1       | <0.001 | 0.744 | 0.700~0.791 | <0.001 |
| NTAN1         | <0.001 | 1.716 | 1.535~1.919 | <0.001 |
| ZBTB8OS       | <0.001 | 1.714 | 1.534~1.915 | <0.001 |
| RP11-149I23.3 | <0.001 | 0.530 | 0.465~0.604 | <0.001 |
| HSPB6         | <0.001 | 1.300 | 1.231~1.372 | <0.001 |
| FBLN5         | <0.001 | 1.321 | 1.247~1.399 | <0.001 |
| ARPC1B        | <0.001 | 1.413 | 1.316~1.518 | <0.001 |
| ATP6V0A1      | <0.001 | 0.709 | 0.661~0.762 | <0.001 |
| ALPK3         | <0.001 | 1.645 | 1.485~1.823 | <0.001 |
| CCNL2         | <0.001 | 1.487 | 1.370~1.614 | <0.001 |
| DNAJC8        | <0.001 | 1.663 | 1.498~1.847 | <0.001 |
| FAM19A1       | <0.001 | 0.600 | 0.540~0.667 | <0.001 |
| PTAR1         | <0.001 | 1.672 | 1.504~1.859 | <0.001 |
| USP1          | <0.001 | 1.635 | 1.477~1.809 | <0.001 |
| MFSD12        | <0.001 | 1.989 | 1.726~2.292 | <0.001 |
| RP11-513M16.8 | <0.001 | 0.609 | 0.550~0.675 | <0.001 |
| CLP1          | <0.001 | 2.018 | 1.746~2.332 | <0.001 |
| PLCE1         | <0.001 | 1.616 | 1.464~1.784 | <0.001 |
| PAK7          | <0.001 | 0.569 | 0.506~0.639 | <0.001 |
| MOB3A         | <0.001 | 1.863 | 1.639~2.118 | <0.001 |
| ZNF345        | <0.001 | 1.965 | 1.710~2.258 | <0.001 |
| FAM86C1       | <0.001 | 1.537 | 1.407~1.679 | <0.001 |
| C1S           | <0.001 | 1.304 | 1.234~1.377 | <0.001 |
| SAT1          | <0.001 | 1.411 | 1.315~1.515 | <0.001 |
| ZNRF2         | <0.001 | 1.797 | 1.593~2.027 | <0.001 |
| GAL3ST4       | <0.001 | 1.586 | 1.443~1.744 | <0.001 |
| SPCS3         | <0.001 | 1.715 | 1.535~1.917 | <0.001 |
| RAB38         | <0.001 | 1.935 | 1.690~2.217 | <0.001 |
| AKIRIN1       | <0.001 | 1.713 | 1.534~1.913 | <0.001 |
| PVRL3-AS1     | <0.001 | 0.351 | 0.283~0.436 | <0.001 |
| DCP2          | <0.001 | 2.308 | 1.944~2.741 | <0.001 |
| CNNM1         | <0.001 | 0.537 | 0.472~0.610 | <0.001 |
| PSMD8         | <0.001 | 1.773 | 1.576~1.994 | <0.001 |
| PSMD9         | <0.001 | 1.981 | 1.721~2.279 | <0.001 |
| OAS2          | <0.001 | 1.432 | 1.330~1.541 | <0.001 |
| MYO1G         | <0.001 | 1.407 | 1.312~1.510 | <0.001 |
| RP11-3L21.2   | <0.001 | 1.619 | 1.466~1.787 | <0.001 |
| NDRG3         | <0.001 | 0.677 | 0.625~0.733 | <0.001 |
| FERMT1        | <0.001 | 0.759 | 0.718~0.804 | <0.001 |
| POP4          | <0.001 | 1.679 | 1.510~1.868 | <0.001 |
| RP11-347E10.1 | <0.001 | 1.632 | 1.476~1.804 | <0.001 |
| SEC61A1       | <0.001 | 1.737 | 1.551~1.945 | <0.001 |
| LINC00263     | <0.001 | 0.588 | 0.528~0.656 | <0.001 |
| PABPC4        | <0.001 | 1.809 | 1.602~2.042 | <0.001 |
| LYZ           | <0.001 | 1.263 | 1.204~1.325 | <0.001 |
| VWA5B2        | <0.001 | 0.714 | 0.666~0.765 | <0.001 |
| CNOT11        | <0.001 | 1.814 | 1.606~2.050 | <0.001 |
| NT5C1A        | <0.001 | 0.440 | 0.372~0.521 | <0.001 |
| P2RX6         | <0.001 | 0.697 | 0.647~0.750 | <0.001 |

|                 |        |       |             |        |
|-----------------|--------|-------|-------------|--------|
| LL22NC03-86G7.1 | <0.001 | 0.379 | 0.311~0.463 | <0.001 |
| CDIP1           | <0.001 | 0.717 | 0.670~0.768 | <0.001 |
| CAMK2G          | <0.001 | 0.707 | 0.658~0.759 | <0.001 |
| CD99P1          | <0.001 | 1.937 | 1.692~2.217 | <0.001 |
| NOP2            | <0.001 | 1.636 | 1.480~1.809 | <0.001 |
| GSX2            | <0.001 | 1.394 | 1.302~1.491 | <0.001 |
| GRAMD1A         | <0.001 | 1.885 | 1.656~2.145 | <0.001 |
| DDR2            | <0.001 | 1.451 | 1.345~1.565 | <0.001 |
| ELAVL1          | <0.001 | 1.778 | 1.581~1.999 | <0.001 |
| TSPY26P         | <0.001 | 0.458 | 0.390~0.537 | <0.001 |
| TRAPPC3         | <0.001 | 1.848 | 1.630~2.094 | <0.001 |
| RP5-1024N4.4    | <0.001 | 1.510 | 1.389~1.643 | <0.001 |
| MYL3            | <0.001 | 0.695 | 0.645~0.748 | <0.001 |
| BRSK2           | <0.001 | 0.746 | 0.703~0.792 | <0.001 |
| HOXA11-AS       | <0.001 | 1.497 | 1.379~1.625 | <0.001 |
| TMEM72-AS1      | <0.001 | 0.049 | 0.027~0.091 | <0.001 |
| APOBEC3F        | <0.001 | 1.598 | 1.452~1.758 | <0.001 |
| IFT57           | <0.001 | 1.627 | 1.473~1.796 | <0.001 |
| ZC3HAV1         | <0.001 | 1.833 | 1.620~2.073 | <0.001 |
| SLC35A2         | <0.001 | 1.938 | 1.694~2.218 | <0.001 |
| EIF3I           | <0.001 | 1.881 | 1.654~2.139 | <0.001 |
| RER1            | <0.001 | 1.827 | 1.616~2.065 | <0.001 |
| TCEA3           | <0.001 | 1.385 | 1.296~1.479 | <0.001 |
| HOXB4           | <0.001 | 1.626 | 1.473~1.794 | <0.001 |
| PTOV1-AS1       | <0.001 | 1.914 | 1.678~2.185 | <0.001 |
| GMPS            | <0.001 | 2.001 | 1.738~2.304 | <0.001 |
| CD74            | <0.001 | 1.293 | 1.227~1.362 | <0.001 |
| MPZL3           | <0.001 | 3.097 | 2.461~3.897 | <0.001 |
| CAPG            | <0.001 | 1.286 | 1.222~1.353 | <0.001 |
| PARP14          | <0.001 | 1.566 | 1.429~1.715 | <0.001 |
| ADAMTS14        | <0.001 | 1.424 | 1.326~1.531 | <0.001 |
| CELF3           | <0.001 | 0.774 | 0.734~0.815 | <0.001 |
| CEBPG           | <0.001 | 1.708 | 1.532~1.904 | <0.001 |
| UTP11L          | <0.001 | 1.888 | 1.660~2.148 | <0.001 |
| PARD6A          | <0.001 | 0.708 | 0.660~0.759 | <0.001 |
| MNS1            | <0.001 | 1.598 | 1.453~1.757 | <0.001 |
| PCNA            | <0.001 | 1.460 | 1.352~1.576 | <0.001 |
| SMO             | <0.001 | 1.614 | 1.465~1.778 | <0.001 |
| CCDC34          | <0.001 | 1.544 | 1.414~1.686 | <0.001 |
| ZMYM6NB         | <0.001 | 1.542 | 1.413~1.684 | <0.001 |
| PPCS            | <0.001 | 1.550 | 1.418~1.693 | <0.001 |
| 9-Sep           | <0.001 | 1.714 | 1.537~1.911 | <0.001 |
| CYS1            | <0.001 | 0.542 | 0.479~0.614 | <0.001 |
| ATF3            | <0.001 | 1.323 | 1.250~1.400 | <0.001 |
| DUSP9           | <0.001 | 0.582 | 0.521~0.649 | <0.001 |
| RBP1            | <0.001 | 1.220 | 1.172~1.270 | <0.001 |
| RP11-86H7.7     | <0.001 | 2.182 | 1.863~2.555 | <0.001 |
| IFITM10         | <0.001 | 0.724 | 0.678~0.773 | <0.001 |
| RRAGC           | <0.001 | 1.824 | 1.615~2.060 | <0.001 |
| ANKRD24         | <0.001 | 0.690 | 0.640~0.743 | <0.001 |
| ATL3            | <0.001 | 1.856 | 1.638~2.103 | <0.001 |
| PYGO2           | <0.001 | 2.092 | 1.802~2.429 | <0.001 |

|                |        |       |             |        |
|----------------|--------|-------|-------------|--------|
| ABHD14A        | <0.001 | 0.721 | 0.675~0.770 | <0.001 |
| SQRDL          | <0.001 | 1.472 | 1.361~1.592 | <0.001 |
| DEAF1          | <0.001 | 0.732 | 0.687~0.779 | <0.001 |
| RHOQ           | <0.001 | 1.762 | 1.571~1.975 | <0.001 |
| CYTIP          | <0.001 | 1.605 | 1.459~1.767 | <0.001 |
| MICB           | <0.001 | 1.862 | 1.643~2.111 | <0.001 |
| PSMB2          | <0.001 | 1.887 | 1.660~2.145 | <0.001 |
| DGCR2          | <0.001 | 0.620 | 0.563~0.682 | <0.001 |
| SNX22          | <0.001 | 0.772 | 0.732~0.813 | <0.001 |
| SPATA6         | <0.001 | 1.533 | 1.406~1.671 | <0.001 |
| HSPB11         | <0.001 | 1.615 | 1.466~1.778 | <0.001 |
| EXOSC10        | <0.001 | 1.707 | 1.533~1.902 | <0.001 |
| OPA3           | <0.001 | 1.853 | 1.636~2.098 | <0.001 |
| SLC47A1        | <0.001 | 1.558 | 1.425~1.704 | <0.001 |
| PNRC2          | <0.001 | 1.611 | 1.463~1.773 | <0.001 |
| RP11-158M2.5   | <0.001 | 0.461 | 0.394~0.539 | <0.001 |
| SYN3           | <0.001 | 0.591 | 0.532~0.658 | <0.001 |
| SLC12A7        | <0.001 | 1.540 | 1.412~1.680 | <0.001 |
| FUT4           | <0.001 | 1.914 | 1.679~2.182 | <0.001 |
| ITGA2          | <0.001 | 1.646 | 1.489~1.820 | <0.001 |
| EXTL2          | <0.001 | 1.709 | 1.534~1.904 | <0.001 |
| HELLS          | <0.001 | 1.554 | 1.422~1.698 | <0.001 |
| CASQ1          | <0.001 | 0.697 | 0.649~0.750 | <0.001 |
| KCNK12         | <0.001 | 0.580 | 0.520~0.647 | <0.001 |
| CBX7           | <0.001 | 0.645 | 0.590~0.704 | <0.001 |
| FAM117A        | <0.001 | 1.903 | 1.672~2.166 | <0.001 |
| GFRA1          | <0.001 | 0.661 | 0.609~0.719 | <0.001 |
| RP11-482M8.3   | <0.001 | 0.516 | 0.452~0.590 | <0.001 |
| RP11-1017G21.5 | <0.001 | 0.478 | 0.412~0.554 | <0.001 |
| GDNF-AS1       | <0.001 | 0.662 | 0.609~0.719 | <0.001 |
| PAK4           | <0.001 | 1.586 | 1.445~1.740 | <0.001 |
| MMP7           | <0.001 | 1.308 | 1.239~1.380 | <0.001 |
| NOXA1          | <0.001 | 0.622 | 0.566~0.684 | <0.001 |
| SEZ6L2         | <0.001 | 0.767 | 0.727~0.809 | <0.001 |
| ATP7A          | <0.001 | 2.526 | 2.097~3.042 | <0.001 |
| BAK1           | <0.001 | 2.246 | 1.909~2.642 | <0.001 |
| ZNF416         | <0.001 | 2.596 | 2.144~3.143 | <0.001 |
| AP001046.5     | <0.001 | 2.872 | 2.325~3.549 | <0.001 |
| DGKK           | <0.001 | 0.185 | 0.132~0.259 | <0.001 |
| NFKBIZ         | <0.001 | 1.405 | 1.312~1.504 | <0.001 |
| TANC1          | <0.001 | 1.652 | 1.494~1.826 | <0.001 |
| CTD-2587M2.1   | <0.001 | 4.475 | 3.315~6.041 | <0.001 |
| CKAP4          | <0.001 | 1.742 | 1.559~1.946 | <0.001 |
| PDGFA          | <0.001 | 1.442 | 1.340~1.552 | <0.001 |
| RP11-731J8.2   | <0.001 | 0.652 | 0.599~0.711 | <0.001 |
| SYCE1          | <0.001 | 0.638 | 0.583~0.698 | <0.001 |
| ZNF526         | <0.001 | 2.296 | 1.944~2.711 | <0.001 |
| B4GALT5        | <0.001 | 1.554 | 1.423~1.697 | <0.001 |
| CTD-3138B18.5  | <0.001 | 2.169 | 1.858~2.532 | <0.001 |
| CYTL1          | <0.001 | 1.430 | 1.331~1.535 | <0.001 |
| DAP            | <0.001 | 1.636 | 1.483~1.805 | <0.001 |
| AC002429.5     | <0.001 | 0.406 | 0.339~0.486 | <0.001 |

|               |        |       |             |        |
|---------------|--------|-------|-------------|--------|
| SRGAP3        | <0.001 | 0.573 | 0.513~0.641 | <0.001 |
| HLA-DPA1      | <0.001 | 1.278 | 1.217~1.342 | <0.001 |
| GRIA1         | <0.001 | 0.741 | 0.698~0.787 | <0.001 |
| ACOT9         | <0.001 | 1.734 | 1.554~1.936 | <0.001 |
| LRRC59        | <0.001 | 1.685 | 1.518~1.869 | <0.001 |
| DPEP1         | <0.001 | 1.304 | 1.237~1.375 | <0.001 |
| RP13-514E23.1 | <0.001 | 0.646 | 0.592~0.704 | <0.001 |
| SERPING1      | <0.001 | 1.279 | 1.218~1.344 | <0.001 |
| NFAM1         | <0.001 | 1.727 | 1.549~1.925 | <0.001 |
| BTG3          | <0.001 | 1.501 | 1.384~1.628 | <0.001 |
| STXBP6        | <0.001 | 0.665 | 0.613~0.721 | <0.001 |
| PLEKHB1       | <0.001 | 0.776 | 0.738~0.816 | <0.001 |
| TSEN34        | <0.001 | 1.814 | 1.611~2.042 | <0.001 |
| SOAT1         | <0.001 | 1.746 | 1.562~1.951 | <0.001 |
| RP11-266K4.9  | <0.001 | 0.552 | 0.491~0.622 | <0.001 |
| GPR162        | <0.001 | 0.725 | 0.680~0.773 | <0.001 |
| SSFA2         | <0.001 | 1.510 | 1.391~1.639 | <0.001 |
| ZBTB7B        | <0.001 | 1.774 | 1.583~1.989 | <0.001 |
| RGS7          | <0.001 | 0.667 | 0.615~0.723 | <0.001 |
| RTN4R         | <0.001 | 0.716 | 0.670~0.765 | <0.001 |
| RAP1B         | <0.001 | 1.468 | 1.360~1.584 | <0.001 |
| ZNF761        | <0.001 | 1.982 | 1.730~2.270 | <0.001 |
| CAMK2N2       | <0.001 | 0.759 | 0.719~0.802 | <0.001 |
| RP11-253E3.3  | <0.001 | 1.862 | 1.645~2.106 | <0.001 |
| SLC25A19      | <0.001 | 1.622 | 1.473~1.786 | <0.001 |
| FUT9          | <0.001 | 0.649 | 0.596~0.707 | <0.001 |
| TMSB4X        | <0.001 | 1.404 | 1.312~1.501 | <0.001 |
| FOXD3         | <0.001 | 1.423 | 1.327~1.526 | <0.001 |
| MYBPH         | <0.001 | 1.299 | 1.233~1.369 | <0.001 |
| PROCR         | <0.001 | 1.634 | 1.482~1.801 | <0.001 |
| TMEM140       | <0.001 | 1.620 | 1.472~1.783 | <0.001 |
| CAMK4         | <0.001 | 0.593 | 0.534~0.658 | <0.001 |
| LINC00339     | <0.001 | 1.763 | 1.575~1.973 | <0.001 |
| BSN           | <0.001 | 0.597 | 0.538~0.661 | <0.001 |
| EMC1          | <0.001 | 1.843 | 1.632~2.081 | <0.001 |
| TRIM38        | <0.001 | 1.721 | 1.546~1.917 | <0.001 |
| BRCA2         | <0.001 | 1.814 | 1.612~2.042 | <0.001 |
| SIAH2         | <0.001 | 1.901 | 1.673~2.159 | <0.001 |
| TMEM69        | <0.001 | 1.810 | 1.609~2.037 | <0.001 |
| BGN           | <0.001 | 1.285 | 1.223~1.351 | <0.001 |
| LINC00601     | <0.001 | 2.999 | 2.412~3.728 | <0.001 |
| THBD          | <0.001 | 1.405 | 1.314~1.503 | <0.001 |
| MPZL2         | <0.001 | 1.560 | 1.428~1.703 | <0.001 |
| RNF19B        | <0.001 | 1.802 | 1.604~2.026 | <0.001 |
| YRDC          | <0.001 | 1.871 | 1.652~2.118 | <0.001 |
| LILRA6        | <0.001 | 1.572 | 1.437~1.719 | <0.001 |
| OMG           | <0.001 | 0.785 | 0.748~0.823 | <0.001 |
| SHMT1         | <0.001 | 1.877 | 1.657~2.127 | <0.001 |
| DEGS2         | <0.001 | 0.569 | 0.509~0.637 | <0.001 |
| DNAJC12       | <0.001 | 0.716 | 0.671~0.765 | <0.001 |
| MOGS          | <0.001 | 2.306 | 1.954~2.720 | <0.001 |
| APLN          | <0.001 | 1.350 | 1.273~1.433 | <0.001 |

|            |        |       |             |        |
|------------|--------|-------|-------------|--------|
| CNTNAP2    | <0.001 | 0.681 | 0.631~0.734 | <0.001 |
| SLC20A1    | <0.001 | 1.573 | 1.438~1.720 | <0.001 |
| NTSR2      | <0.001 | 0.796 | 0.761~0.833 | <0.001 |
| TMEM185B   | <0.001 | 1.626 | 1.477~1.790 | <0.001 |
| ACTG2      | <0.001 | 1.294 | 1.230~1.362 | <0.001 |
| BAI3       | <0.001 | 0.693 | 0.645~0.745 | <0.001 |
| ISG20      | <0.001 | 1.333 | 1.260~1.411 | <0.001 |
| NEU4       | <0.001 | 0.786 | 0.750~0.825 | <0.001 |
| C12orf5    | <0.001 | 1.628 | 1.479~1.793 | <0.001 |
| SLC8A3     | <0.001 | 0.666 | 0.615~0.722 | <0.001 |
| GAREML     | <0.001 | 0.703 | 0.656~0.754 | <0.001 |
| DHX34      | <0.001 | 1.820 | 1.617~2.048 | <0.001 |
| HOXA9      | <0.001 | 1.394 | 1.305~1.488 | <0.001 |
| LXN        | <0.001 | 1.441 | 1.341~1.548 | <0.001 |
| EMR2       | <0.001 | 1.591 | 1.452~1.743 | <0.001 |
| MEGF11     | <0.001 | 0.712 | 0.666~0.761 | <0.001 |
| C4orf6     | <0.001 | 1.928 | 1.694~2.195 | <0.001 |
| GANAB      | <0.001 | 1.887 | 1.665~2.138 | <0.001 |
| PRPF38B    | <0.001 | 1.630 | 1.480~1.795 | <0.001 |
| LRRC16B    | <0.001 | 0.642 | 0.589~0.701 | <0.001 |
| APBB1      | <0.001 | 0.680 | 0.631~0.734 | <0.001 |
| TMEM45A    | <0.001 | 1.439 | 1.340~1.546 | <0.001 |
| GNAO1      | <0.001 | 0.720 | 0.675~0.768 | <0.001 |
| NFIL3      | <0.001 | 1.555 | 1.426~1.696 | <0.001 |
| HCLS1      | <0.001 | 1.454 | 1.351~1.566 | <0.001 |
| ZNF90      | <0.001 | 1.784 | 1.592~2.000 | <0.001 |
| ZNF829     | <0.001 | 2.447 | 2.052~2.918 | <0.001 |
| GPR158     | <0.001 | 0.648 | 0.595~0.706 | <0.001 |
| TSPAN7     | <0.001 | 0.795 | 0.760~0.831 | <0.001 |
| NET1       | <0.001 | 0.660 | 0.608~0.716 | <0.001 |
| GLIS3      | <0.001 | 1.452 | 1.350~1.563 | <0.001 |
| IFI16      | <0.001 | 1.454 | 1.351~1.565 | <0.001 |
| CYB5RL     | <0.001 | 2.189 | 1.876~2.553 | <0.001 |
| DMRTC1B    | <0.001 | 0.678 | 0.629~0.732 | <0.001 |
| CMTM5      | <0.001 | 0.782 | 0.745~0.821 | <0.001 |
| KNSTRN     | <0.001 | 1.665 | 1.506~1.840 | <0.001 |
| AL022344.7 | <0.001 | 0.426 | 0.361~0.504 | <0.001 |
| SRSF9      | <0.001 | 1.639 | 1.487~1.806 | <0.001 |
| SPINK8     | <0.001 | 1.462 | 1.357~1.575 | <0.001 |
| TCF7       | <0.001 | 1.596 | 1.456~1.749 | <0.001 |
| ADHFE1     | <0.001 | 0.678 | 0.629~0.732 | <0.001 |
| YKT6       | <0.001 | 1.935 | 1.700~2.203 | <0.001 |
| MCMD2C2    | <0.001 | 0.270 | 0.209~0.349 | <0.001 |
| EDEM2      | <0.001 | 1.812 | 1.612~2.036 | <0.001 |
| ARPC5      | <0.001 | 1.588 | 1.450~1.738 | <0.001 |
| CMTM3      | <0.001 | 1.643 | 1.490~1.811 | <0.001 |
| LTBR       | <0.001 | 1.483 | 1.372~1.602 | <0.001 |
| PKN2       | <0.001 | 1.758 | 1.574~1.964 | <0.001 |
| C1orf174   | <0.001 | 2.031 | 1.768~2.334 | <0.001 |
| PHEX       | <0.001 | 1.671 | 1.511~1.848 | <0.001 |
| VPS51      | <0.001 | 0.522 | 0.460~0.593 | <0.001 |
| SEMA3F     | <0.001 | 1.454 | 1.351~1.565 | <0.001 |

|              |        |       |             |        |
|--------------|--------|-------|-------------|--------|
| NECAB2       | <0.001 | 0.782 | 0.745~0.820 | <0.001 |
| PTPN7        | <0.001 | 1.485 | 1.374~1.605 | <0.001 |
| FXVD6        | <0.001 | 0.805 | 0.772~0.840 | <0.001 |
| PROS1        | <0.001 | 1.467 | 1.361~1.582 | <0.001 |
| RGS3         | <0.001 | 1.546 | 1.419~1.683 | <0.001 |
| UBE2T        | <0.001 | 1.415 | 1.322~1.514 | <0.001 |
| RACGAP1      | <0.001 | 1.550 | 1.422~1.689 | <0.001 |
| CFLAR        | <0.001 | 1.915 | 1.686~2.175 | <0.001 |
| RP1-140K8.5  | <0.001 | 2.236 | 1.910~2.618 | <0.001 |
| AGTRAP       | <0.001 | 1.503 | 1.387~1.627 | <0.001 |
| MRGBP        | <0.001 | 1.815 | 1.615~2.040 | <0.001 |
| LRRC25       | <0.001 | 1.480 | 1.371~1.599 | <0.001 |
| SLC8A2       | <0.001 | 0.709 | 0.663~0.758 | <0.001 |
| C1orf85      | <0.001 | 1.477 | 1.369~1.595 | <0.001 |
| NLRC5        | <0.001 | 1.465 | 1.359~1.579 | <0.001 |
| KCNJ9        | <0.001 | 0.732 | 0.688~0.778 | <0.001 |
| RPRM         | <0.001 | 0.757 | 0.717~0.800 | <0.001 |
| SETD8        | <0.001 | 2.104 | 1.819~2.434 | <0.001 |
| FKBP7        | <0.001 | 1.641 | 1.489~1.808 | <0.001 |
| SPAG4        | <0.001 | 1.415 | 1.322~1.514 | <0.001 |
| LAIR1        | <0.001 | 1.408 | 1.317~1.506 | <0.001 |
| SEC31A       | <0.001 | 1.935 | 1.700~2.201 | <0.001 |
| EDN3         | <0.001 | 0.599 | 0.542~0.662 | <0.001 |
| PIIH         | <0.001 | 1.707 | 1.537~1.895 | <0.001 |
| SLC25A23     | <0.001 | 0.669 | 0.619~0.724 | <0.001 |
| FAM110B      | <0.001 | 0.706 | 0.659~0.756 | <0.001 |
| KCNC1        | <0.001 | 0.662 | 0.610~0.717 | <0.001 |
| ORC6         | <0.001 | 1.534 | 1.411~1.668 | <0.001 |
| CHAF1A       | <0.001 | 1.558 | 1.429~1.699 | <0.001 |
| HSF2BP       | <0.001 | 0.492 | 0.428~0.565 | <0.001 |
| CTIF         | <0.001 | 0.720 | 0.675~0.767 | <0.001 |
| PTPN22       | <0.001 | 2.175 | 1.869~2.531 | <0.001 |
| HMGCLL1      | <0.001 | 0.589 | 0.531~0.653 | <0.001 |
| CIITA        | <0.001 | 1.432 | 1.335~1.535 | <0.001 |
| IGFBP7       | <0.001 | 1.409 | 1.318~1.507 | <0.001 |
| FHL3         | <0.001 | 1.672 | 1.513~1.849 | <0.001 |
| SELL         | <0.001 | 0.759 | 0.720~0.801 | <0.001 |
| C1QTNF6      | <0.001 | 1.584 | 1.448~1.732 | <0.001 |
| RAB27A       | <0.001 | 1.706 | 1.538~1.894 | <0.001 |
| DPAGT1       | <0.001 | 1.776 | 1.588~1.986 | <0.001 |
| HIST1H2BH    | <0.001 | 1.218 | 1.172~1.265 | <0.001 |
| AC005682.5   | <0.001 | 1.853 | 1.643~2.090 | <0.001 |
| PRPS2        | <0.001 | 1.564 | 1.433~1.706 | <0.001 |
| NAP1L3       | <0.001 | 0.729 | 0.686~0.776 | <0.001 |
| RGS19        | <0.001 | 1.634 | 1.485~1.798 | <0.001 |
| MYH7B        | <0.001 | 0.691 | 0.643~0.742 | <0.001 |
| FGFRL1       | <0.001 | 1.440 | 1.341~1.546 | <0.001 |
| MYH15        | <0.001 | 0.338 | 0.274~0.418 | <0.001 |
| CYP2E1       | <0.001 | 0.633 | 0.579~0.692 | <0.001 |
| SOX8         | <0.001 | 0.813 | 0.781~0.846 | <0.001 |
| ZNF625-ZNF20 | <0.001 | 2.377 | 2.009~2.814 | <0.001 |
| FHOD1        | <0.001 | 1.605 | 1.464~1.760 | <0.001 |

|               |        |       |             |        |
|---------------|--------|-------|-------------|--------|
| SLFN12        | <0.001 | 1.791 | 1.599~2.006 | <0.001 |
| CARHSP1       | <0.001 | 1.680 | 1.519~1.858 | <0.001 |
| ZC3HAV1L      | <0.001 | 1.947 | 1.710~2.216 | <0.001 |
| AKR1C1        | <0.001 | 0.705 | 0.659~0.755 | <0.001 |
| GALNT5        | <0.001 | 1.883 | 1.665~2.129 | <0.001 |
| SREBF2        | <0.001 | 0.621 | 0.566~0.681 | <0.001 |
| SLC29A2       | <0.001 | 0.635 | 0.581~0.693 | <0.001 |
| CSDE1         | <0.001 | 1.712 | 1.542~1.900 | <0.001 |
| ADM2          | <0.001 | 1.983 | 1.736~2.264 | <0.001 |
| HOXD3         | <0.001 | 1.460 | 1.357~1.572 | <0.001 |
| DNALI1        | <0.001 | 1.423 | 1.329~1.524 | <0.001 |
| FGF13         | <0.001 | 0.722 | 0.678~0.769 | <0.001 |
| RPN2          | <0.001 | 1.714 | 1.544~1.903 | <0.001 |
| CCDC9         | <0.001 | 1.858 | 1.647~2.095 | <0.001 |
| ITGA3         | <0.001 | 1.420 | 1.327~1.520 | <0.001 |
| ST6GALNAC1    | <0.001 | 0.523 | 0.461~0.593 | <0.001 |
| NKIRAS2       | <0.001 | 1.878 | 1.662~2.122 | <0.001 |
| FAM91A1       | <0.001 | 1.658 | 1.504~1.829 | <0.001 |
| GPR82         | <0.001 | 2.002 | 1.750~2.290 | <0.001 |
| LAMA2         | <0.001 | 1.500 | 1.387~1.623 | <0.001 |
| SNCB          | <0.001 | 0.820 | 0.789~0.852 | <0.001 |
| HOXD4         | <0.001 | 1.448 | 1.348~1.555 | <0.001 |
| GLA           | <0.001 | 1.635 | 1.486~1.798 | <0.001 |
| CDC42         | <0.001 | 1.719 | 1.548~1.909 | <0.001 |
| CERS2         | <0.001 | 1.605 | 1.465~1.759 | <0.001 |
| RP11-383C5.4  | <0.001 | 0.601 | 0.545~0.663 | <0.001 |
| CAB39L        | <0.001 | 0.640 | 0.587~0.698 | <0.001 |
| GMPPB         | <0.001 | 1.850 | 1.642~2.084 | <0.001 |
| DRP2          | <0.001 | 0.575 | 0.517~0.640 | <0.001 |
| FZD2          | <0.001 | 1.543 | 1.419~1.678 | <0.001 |
| COL12A1       | <0.001 | 1.415 | 1.323~1.513 | <0.001 |
| RP13-238F13.5 | <0.001 | 0.352 | 0.287~0.430 | <0.001 |
| LINC00346     | <0.001 | 1.782 | 1.594~1.992 | <0.001 |
| KDELR2        | <0.001 | 1.574 | 1.442~1.718 | <0.001 |
| PDIA6         | <0.001 | 1.645 | 1.494~1.811 | <0.001 |
| TGFBI         | <0.001 | 1.246 | 1.194~1.300 | <0.001 |
| E2F1          | <0.001 | 1.525 | 1.405~1.654 | <0.001 |
| TNFAIP3       | <0.001 | 1.436 | 1.339~1.539 | <0.001 |
| EMILIN1       | <0.001 | 1.308 | 1.242~1.378 | <0.001 |
| ASIC4         | <0.001 | 0.799 | 0.765~0.835 | <0.001 |
| B3GNT7        | <0.001 | 1.439 | 1.342~1.544 | <0.001 |
| MTFR1         | <0.001 | 2.100 | 1.820~2.424 | <0.001 |
| LIMS2         | <0.001 | 0.722 | 0.678~0.769 | <0.001 |
| NSUN4         | <0.001 | 2.163 | 1.864~2.511 | <0.001 |
| SHQ1          | <0.001 | 1.927 | 1.698~2.187 | <0.001 |
| FAM181A-AS1   | <0.001 | 1.516 | 1.399~1.642 | <0.001 |
| ZMPSTE24      | <0.001 | 1.732 | 1.558~1.926 | <0.001 |
| XRN2          | <0.001 | 1.703 | 1.537~1.887 | <0.001 |
| RBBP8         | <0.001 | 1.579 | 1.446~1.724 | <0.001 |
| RCAN1         | <0.001 | 1.345 | 1.270~1.424 | <0.001 |
| ICAM1         | <0.001 | 1.329 | 1.258~1.403 | <0.001 |
| SASS6         | <0.001 | 2.416 | 2.038~2.864 | <0.001 |



|               |        |       |             |        |
|---------------|--------|-------|-------------|--------|
| ARHGAP44      | <0.001 | 0.620 | 0.566~0.680 | <0.001 |
| ZNF552        | <0.001 | 2.279 | 1.944~2.671 | <0.001 |
| TICRR         | <0.001 | 1.908 | 1.685~2.161 | <0.001 |
| PHLDA2        | <0.001 | 1.341 | 1.267~1.419 | <0.001 |
| FABP5P7       | <0.001 | 1.474 | 1.368~1.589 | <0.001 |
| RHPN2         | <0.001 | 1.521 | 1.403~1.649 | <0.001 |
| CDCA5         | <0.001 | 1.484 | 1.376~1.602 | <0.001 |
| TRIP6         | <0.001 | 1.490 | 1.380~1.609 | <0.001 |
| PTGR1         | <0.001 | 1.618 | 1.475~1.775 | <0.001 |
| SYT4          | <0.001 | 0.723 | 0.679~0.769 | <0.001 |
| SIPA1L2       | <0.001 | 1.713 | 1.545~1.900 | <0.001 |
| RP11-547D24.1 | <0.001 | 0.427 | 0.363~0.503 | <0.001 |
| SSTR1         | <0.001 | 0.591 | 0.534~0.654 | <0.001 |
| HOXC8         | <0.001 | 1.745 | 1.568~1.943 | <0.001 |
| ORAI2         | <0.001 | 1.736 | 1.561~1.930 | <0.001 |
| IRF1          | <0.001 | 1.453 | 1.352~1.561 | <0.001 |
| AC006126.4    | <0.001 | 1.573 | 1.442~1.716 | <0.001 |
| PFN1          | <0.001 | 1.586 | 1.451~1.733 | <0.001 |
| APOBR         | <0.001 | 1.604 | 1.465~1.756 | <0.001 |
| PI4K2B        | <0.001 | 1.853 | 1.646~2.086 | <0.001 |
| THRA          | <0.001 | 0.707 | 0.661~0.756 | <0.001 |
| RP11-231C18.1 | <0.001 | 0.791 | 0.756~0.827 | <0.001 |
| TGFB111       | <0.001 | 1.509 | 1.394~1.633 | <0.001 |
| TNNT1         | <0.001 | 0.773 | 0.736~0.812 | <0.001 |
| SHD           | <0.001 | 0.834 | 0.806~0.864 | <0.001 |
| APITD1        | <0.001 | 1.685 | 1.525~1.863 | <0.001 |
| SUMF1         | <0.001 | 1.967 | 1.727~2.239 | <0.001 |
| KIF1A         | <0.001 | 0.752 | 0.712~0.794 | <0.001 |
| SYT9          | <0.001 | 0.546 | 0.486~0.613 | <0.001 |
| TPM3          | <0.001 | 1.885 | 1.669~2.129 | <0.001 |
| RP11-58B17.2  | <0.001 | 0.766 | 0.728~0.806 | <0.001 |
| BARD1         | <0.001 | 1.617 | 1.474~1.773 | <0.001 |
| PLS3          | <0.001 | 1.494 | 1.384~1.614 | <0.001 |
| NAB2          | <0.001 | 1.746 | 1.569~1.942 | <0.001 |
| CCNYL1        | <0.001 | 2.113 | 1.831~2.439 | <0.001 |
| CDK5R2        | <0.001 | 0.742 | 0.700~0.785 | <0.001 |
| NRBP1         | <0.001 | 2.217 | 1.904~2.583 | <0.001 |
| PLXNA3        | <0.001 | 1.599 | 1.461~1.749 | <0.001 |
| OSR2          | <0.001 | 1.474 | 1.368~1.587 | <0.001 |
| HSPA5         | <0.001 | 1.503 | 1.390~1.625 | <0.001 |
| RNASE4        | <0.001 | 1.478 | 1.371~1.592 | <0.001 |
| ZNF45         | <0.001 | 1.852 | 1.646~2.084 | <0.001 |
| RP11-21A7A.4  | <0.001 | 0.585 | 0.528~0.648 | <0.001 |
| SFRP4         | <0.001 | 1.297 | 1.234~1.363 | <0.001 |
| ZNF468        | <0.001 | 1.704 | 1.539~1.887 | <0.001 |
| DNAJC2        | <0.001 | 1.886 | 1.670~2.129 | <0.001 |
| KBTBD11       | <0.001 | 0.642 | 0.590~0.699 | <0.001 |
| SRRM4         | <0.001 | 0.555 | 0.496~0.621 | <0.001 |
| SAA1          | <0.001 | 1.165 | 1.131~1.199 | <0.001 |
| SCN2B         | <0.001 | 0.640 | 0.588~0.697 | <0.001 |
| LCP2          | <0.001 | 1.466 | 1.362~1.577 | <0.001 |
| SIGLEC9       | <0.001 | 1.550 | 1.426~1.686 | <0.001 |

|           |        |       |             |        |
|-----------|--------|-------|-------------|--------|
| FRA10AC1  | <0.001 | 0.728 | 0.685~0.773 | <0.001 |
| RTCA      | <0.001 | 1.975 | 1.735~2.250 | <0.001 |
| GRIA4     | <0.001 | 0.740 | 0.699~0.784 | <0.001 |
| TMBIM1    | <0.001 | 1.514 | 1.399~1.639 | <0.001 |
| SRSF2     | <0.001 | 1.830 | 1.630~2.053 | <0.001 |
| SEC22B    | <0.001 | 1.680 | 1.521~1.854 | <0.001 |
| CRB2      | <0.001 | 1.406 | 1.318~1.501 | <0.001 |
| TMEM214   | <0.001 | 2.102 | 1.824~2.422 | <0.001 |
| RAB32     | <0.001 | 1.436 | 1.340~1.539 | <0.001 |
| AEBP1     | <0.001 | 1.261 | 1.207~1.318 | <0.001 |
| ZNF155    | <0.001 | 1.809 | 1.616~2.025 | <0.001 |
| NEBL      | <0.001 | 0.681 | 0.633~0.733 | <0.001 |
| FCGR2B    | <0.001 | 1.285 | 1.225~1.347 | <0.001 |
| CARD8     | <0.001 | 1.826 | 1.629~2.048 | <0.001 |
| STT3A     | <0.001 | 1.775 | 1.592~1.980 | <0.001 |
| CD8BP     | <0.001 | 0.276 | 0.216~0.353 | <0.001 |
| TCTN2     | <0.001 | 1.821 | 1.625~2.041 | <0.001 |
| FAM19A2   | <0.001 | 0.639 | 0.587~0.696 | <0.001 |
| TMEM255B  | <0.001 | 1.513 | 1.398~1.637 | <0.001 |
| PTGFRN    | <0.001 | 1.460 | 1.359~1.569 | <0.001 |
| ARL3      | <0.001 | 0.680 | 0.632~0.731 | <0.001 |
| TBL2      | <0.001 | 2.090 | 1.817~2.405 | <0.001 |
| NCK2      | <0.001 | 1.706 | 1.541~1.888 | <0.001 |
| ARRB1     | <0.001 | 0.625 | 0.572~0.684 | <0.001 |
| HLA-DRA   | <0.001 | 1.278 | 1.219~1.339 | <0.001 |
| CTSB      | <0.001 | 1.449 | 1.350~1.555 | <0.001 |
| SLIT1     | <0.001 | 0.757 | 0.718~0.798 | <0.001 |
| KIAA1644  | <0.001 | 0.652 | 0.601~0.707 | <0.001 |
| CA13      | <0.001 | 2.057 | 1.794~2.360 | <0.001 |
| RAB34     | <0.001 | 1.355 | 1.279~1.435 | <0.001 |
| AKAP2     | <0.001 | 1.596 | 1.460~1.744 | <0.001 |
| DLGAP3    | <0.001 | 0.699 | 0.653~0.748 | <0.001 |
| SLAMF8    | <0.001 | 1.451 | 1.352~1.557 | <0.001 |
| MGAT4B    | <0.001 | 1.846 | 1.643~2.075 | <0.001 |
| CDC25A    | <0.001 | 1.621 | 1.479~1.777 | <0.001 |
| RND1      | <0.001 | 0.684 | 0.636~0.735 | <0.001 |
| NIP7      | <0.001 | 2.190 | 1.887~2.541 | <0.001 |
| ABHD15    | <0.001 | 1.854 | 1.648~2.084 | <0.001 |
| NUDT19    | <0.001 | 2.376 | 2.016~2.801 | <0.001 |
| TMED9     | <0.001 | 1.794 | 1.605~2.004 | <0.001 |
| HMOX1     | <0.001 | 1.280 | 1.221~1.341 | <0.001 |
| PSMC2     | <0.001 | 1.774 | 1.591~1.978 | <0.001 |
| RAC2      | <0.001 | 1.447 | 1.349~1.553 | <0.001 |
| MCF2L2    | <0.001 | 0.604 | 0.549~0.664 | <0.001 |
| CASP3     | <0.001 | 1.622 | 1.480~1.779 | <0.001 |
| NAP1L2    | <0.001 | 0.708 | 0.663~0.756 | <0.001 |
| ITPRIP    | <0.001 | 1.688 | 1.528~1.864 | <0.001 |
| EHD4      | <0.001 | 1.586 | 1.453~1.731 | <0.001 |
| LINC00882 | <0.001 | 0.665 | 0.616~0.719 | <0.001 |
| PPP1R3E   | <0.001 | 0.663 | 0.613~0.717 | <0.001 |
| HDAC7     | <0.001 | 1.827 | 1.630~2.048 | <0.001 |
| GSG2      | <0.001 | 1.755 | 1.577~1.952 | <0.001 |

|               |        |       |             |        |
|---------------|--------|-------|-------------|--------|
| DNAH11        | <0.001 | 1.503 | 1.391~1.623 | <0.001 |
| TP73-AS1      | <0.001 | 1.540 | 1.419~1.672 | <0.001 |
| GRIK4         | <0.001 | 0.597 | 0.541~0.658 | <0.001 |
| AP3B2         | <0.001 | 0.716 | 0.673~0.763 | <0.001 |
| ST14          | <0.001 | 1.425 | 1.333~1.524 | <0.001 |
| SERBP1        | <0.001 | 1.690 | 1.530~1.867 | <0.001 |
| KCNK4         | <0.001 | 0.633 | 0.581~0.690 | <0.001 |
| PC            | <0.001 | 0.651 | 0.600~0.706 | <0.001 |
| DGCR9         | <0.001 | 0.597 | 0.541~0.658 | <0.001 |
| DDX25         | <0.001 | 0.731 | 0.689~0.776 | <0.001 |
| TNFAIP8       | <0.001 | 1.580 | 1.449~1.723 | <0.001 |
| RP11-1055B8.3 | <0.001 | 0.719 | 0.675~0.765 | <0.001 |
| FAM46B        | <0.001 | 1.571 | 1.442~1.711 | <0.001 |
| GDAP2         | <0.001 | 2.054 | 1.792~2.353 | <0.001 |
| CCDC150       | <0.001 | 1.630 | 1.486~1.787 | <0.001 |
| RBBP4         | <0.001 | 1.470 | 1.367~1.582 | <0.001 |
| LRRTM3        | <0.001 | 0.612 | 0.557~0.671 | <0.001 |
| CELF5         | <0.001 | 0.749 | 0.709~0.791 | <0.001 |
| HPCAL4        | <0.001 | 0.755 | 0.716~0.797 | <0.001 |
| P4HB          | <0.001 | 1.584 | 1.452~1.728 | <0.001 |
| RP11-143K11.5 | <0.001 | 0.325 | 0.263~0.401 | <0.001 |
| OLFML3        | <0.001 | 1.496 | 1.387~1.614 | <0.001 |
| RPF1          | <0.001 | 1.791 | 1.605~2.000 | <0.001 |
| IL17D         | <0.001 | 0.767 | 0.730~0.807 | <0.001 |
| COL6A1        | <0.001 | 1.387 | 1.304~1.475 | <0.001 |
| WDFY3-AS2     | <0.001 | 0.565 | 0.507~0.629 | <0.001 |
| GCLM          | <0.001 | 1.749 | 1.574~1.943 | <0.001 |
| HGF           | <0.001 | 1.528 | 1.411~1.655 | <0.001 |
| CHRM1         | <0.001 | 0.697 | 0.651~0.746 | <0.001 |
| MIR22HG       | <0.001 | 1.545 | 1.424~1.677 | <0.001 |
| ERP44         | <0.001 | 2.042 | 1.785~2.335 | <0.001 |
| TMEM51        | <0.001 | 1.695 | 1.534~1.872 | <0.001 |
| APOBEC3D      | <0.001 | 2.260 | 1.938~2.634 | <0.001 |
| CECR6         | <0.001 | 0.580 | 0.523~0.643 | <0.001 |
| KYNU          | <0.001 | 1.631 | 1.487~1.788 | <0.001 |
| CABP1         | <0.001 | 0.770 | 0.733~0.809 | <0.001 |
| RFTN1         | <0.001 | 1.538 | 1.418~1.668 | <0.001 |
| GLUD1         | <0.001 | 0.718 | 0.674~0.764 | <0.001 |
| HOXA11        | <0.001 | 1.689 | 1.531~1.865 | <0.001 |
| FABP5         | <0.001 | 1.240 | 1.191~1.291 | <0.001 |
| C5AR1         | <0.001 | 1.368 | 1.290~1.451 | <0.001 |
| CAST          | <0.001 | 1.654 | 1.505~1.818 | <0.001 |
| BMP1          | <0.001 | 1.692 | 1.533~1.868 | <0.001 |
| ZCCHC6        | <0.001 | 2.179 | 1.882~2.523 | <0.001 |
| GLI3          | <0.001 | 1.738 | 1.567~1.929 | <0.001 |
| LSM14A        | <0.001 | 1.630 | 1.487~1.786 | <0.001 |
| RNPEP         | <0.001 | 1.942 | 1.715~2.201 | <0.001 |
| ITPRIPL2      | <0.001 | 1.581 | 1.451~1.723 | <0.001 |
| STX1B         | <0.001 | 0.684 | 0.637~0.734 | <0.001 |
| RP11-624M8.1  | <0.001 | 0.608 | 0.554~0.667 | <0.001 |
| LHX5          | <0.001 | 0.467 | 0.404~0.538 | <0.001 |
| RPS2P32       | <0.001 | 1.454 | 1.355~1.560 | <0.001 |

|                |        |       |             |        |
|----------------|--------|-------|-------------|--------|
| C1QTNF4        | <0.001 | 0.765 | 0.728~0.804 | <0.001 |
| GUSB           | <0.001 | 1.686 | 1.529~1.860 | <0.001 |
| PTP4A2         | <0.001 | 2.007 | 1.761~2.287 | <0.001 |
| TLR2           | <0.001 | 1.483 | 1.377~1.596 | <0.001 |
| CPE            | <0.001 | 0.774 | 0.738~0.812 | <0.001 |
| IGSF21         | <0.001 | 0.739 | 0.699~0.782 | <0.001 |
| SLC7A14        | <0.001 | 0.629 | 0.577~0.686 | <0.001 |
| KANSL1L        | <0.001 | 1.740 | 1.569~1.930 | <0.001 |
| RP11-713P17.3  | <0.001 | 0.600 | 0.546~0.660 | <0.001 |
| MLX            | <0.001 | 2.260 | 1.940~2.633 | <0.001 |
| C7orf49        | <0.001 | 2.069 | 1.806~2.370 | <0.001 |
| COL22A1        | <0.001 | 1.327 | 1.258~1.399 | <0.001 |
| KPNA6          | <0.001 | 2.215 | 1.909~2.571 | <0.001 |
| IL4I1          | <0.001 | 1.392 | 1.308~1.480 | <0.001 |
| CTB-1I21.1     | <0.001 | 0.446 | 0.384~0.519 | <0.001 |
| MKX            | <0.001 | 0.505 | 0.444~0.574 | <0.001 |
| TBC1D1         | <0.001 | 1.684 | 1.528~1.857 | <0.001 |
| TMEM50A        | <0.001 | 1.695 | 1.536~1.871 | <0.001 |
| RERGL          | <0.001 | 0.641 | 0.590~0.697 | <0.001 |
| GYS1           | <0.001 | 1.890 | 1.678~2.129 | <0.001 |
| RARS           | <0.001 | 2.351 | 2.004~2.758 | <0.001 |
| ANK1           | <0.001 | 0.591 | 0.535~0.652 | <0.001 |
| SLC24A4        | <0.001 | 0.578 | 0.522~0.641 | <0.001 |
| PQLC3          | <0.001 | 1.772 | 1.593~1.972 | <0.001 |
| SLC25A37       | <0.001 | 1.560 | 1.436~1.695 | <0.001 |
| APEX2          | <0.001 | 2.095 | 1.825~2.405 | <0.001 |
| GNAI3          | <0.001 | 1.710 | 1.547~1.890 | <0.001 |
| TMEM43         | <0.001 | 1.813 | 1.623~2.026 | <0.001 |
| MS4A6A         | <0.001 | 1.298 | 1.236~1.362 | <0.001 |
| ERP27          | <0.001 | 1.717 | 1.552~1.899 | <0.001 |
| RFT1           | <0.001 | 2.142 | 1.858~2.469 | <0.001 |
| DSN1           | <0.001 | 1.674 | 1.521~1.843 | <0.001 |
| NGFR           | <0.001 | 1.288 | 1.228~1.350 | <0.001 |
| CENPH          | <0.001 | 1.584 | 1.454~1.726 | <0.001 |
| AC091878.1     | <0.001 | 0.171 | 0.123~0.238 | <0.001 |
| RNASE2         | <0.001 | 1.377 | 1.297~1.461 | <0.001 |
| LPHN1          | <0.001 | 0.607 | 0.553~0.666 | <0.001 |
| CYP27B1        | <0.001 | 1.386 | 1.304~1.473 | <0.001 |
| KIF18B         | <0.001 | 1.446 | 1.350~1.549 | <0.001 |
| ABRACL         | <0.001 | 1.571 | 1.444~1.709 | <0.001 |
| PON1           | <0.001 | 0.354 | 0.292~0.430 | <0.001 |
| ALG6           | <0.001 | 1.896 | 1.683~2.136 | <0.001 |
| RP11-279F6.1   | <0.001 | 0.489 | 0.428~0.559 | <0.001 |
| CAV2           | <0.001 | 1.427 | 1.335~1.525 | <0.001 |
| CACNA2D3       | <0.001 | 0.578 | 0.522~0.640 | <0.001 |
| RP11-1263C18.1 | <0.001 | 0.634 | 0.582~0.690 | <0.001 |
| BZRAP1         | <0.001 | 0.726 | 0.684~0.771 | <0.001 |
| PLIN2          | <0.001 | 1.391 | 1.308~1.479 | <0.001 |
| RP11-806H10.4  | <0.001 | 1.516 | 1.403~1.638 | <0.001 |
| ZMYM1          | <0.001 | 2.057 | 1.798~2.352 | <0.001 |
| ITGA4          | <0.001 | 1.633 | 1.490~1.789 | <0.001 |
| NECAP2         | <0.001 | 1.903 | 1.688~2.145 | <0.001 |

|              |        |       |             |        |
|--------------|--------|-------|-------------|--------|
| SERPINA1     | <0.001 | 1.325 | 1.258~1.397 | <0.001 |
| SNAI1        | <0.001 | 1.628 | 1.487~1.782 | <0.001 |
| HEATR3       | <0.001 | 2.196 | 1.897~2.542 | <0.001 |
| QTRTD1       | <0.001 | 1.890 | 1.679~2.128 | <0.001 |
| SLC16A1      | <0.001 | 1.478 | 1.375~1.590 | <0.001 |
| ARID5A       | <0.001 | 1.560 | 1.436~1.695 | <0.001 |
| SRPR         | <0.001 | 1.937 | 1.713~2.191 | <0.001 |
| MIS18BP1     | <0.001 | 1.701 | 1.541~1.878 | <0.001 |
| RP11-38L15.3 | <0.001 | 0.609 | 0.555~0.667 | <0.001 |
| PAXIP1-AS2   | <0.001 | 1.903 | 1.688~2.144 | <0.001 |
| FLNA         | <0.001 | 1.325 | 1.258~1.396 | <0.001 |
| FKBP15       | <0.001 | 2.065 | 1.805~2.362 | <0.001 |
| ABCB4        | <0.001 | 1.786 | 1.604~1.988 | <0.001 |
| SRSF10       | <0.001 | 1.695 | 1.537~1.870 | <0.001 |
| ZCCHC24      | <0.001 | 0.648 | 0.598~0.703 | <0.001 |
| EPHA2        | <0.001 | 1.463 | 1.364~1.570 | <0.001 |
| FAM129B      | <0.001 | 1.673 | 1.521~1.840 | <0.001 |
| ZNF28        | <0.001 | 1.584 | 1.454~1.725 | <0.001 |
| ZBTB47       | <0.001 | 0.585 | 0.530~0.646 | <0.001 |
| MIS18A       | <0.001 | 1.885 | 1.676~2.121 | <0.001 |
| CTSC         | <0.001 | 1.357 | 1.283~1.436 | <0.001 |
| ANO6         | <0.001 | 1.594 | 1.462~1.738 | <0.001 |
| TTC4         | <0.001 | 2.148 | 1.864~2.474 | <0.001 |
| RPAP2        | <0.001 | 2.222 | 1.917~2.577 | <0.001 |
| TOR4A        | <0.001 | 1.849 | 1.650~2.072 | <0.001 |
| RIPK1        | <0.001 | 2.012 | 1.768~2.290 | <0.001 |
| HIST1H2BJ    | <0.001 | 1.231 | 1.184~1.279 | <0.001 |
| TMEM67       | <0.001 | 1.723 | 1.558~1.906 | <0.001 |
| CTTNBP2NL    | <0.001 | 1.896 | 1.684~2.135 | <0.001 |
| SNRNP40      | <0.001 | 1.833 | 1.639~2.051 | <0.001 |
| PLEKHA8P1    | <0.001 | 1.763 | 1.587~1.958 | <0.001 |
| TRNAU1AP     | <0.001 | 2.045 | 1.792~2.335 | <0.001 |
| SPRN         | <0.001 | 0.606 | 0.552~0.665 | <0.001 |
| S100A3       | <0.001 | 1.327 | 1.260~1.399 | <0.001 |
| MYOF         | <0.001 | 1.511 | 1.400~1.631 | <0.001 |
| LINC00844    | <0.001 | 0.836 | 0.809~0.864 | <0.001 |
| MMP11        | <0.001 | 1.358 | 1.283~1.437 | <0.001 |
| LINC00966    | <0.001 | 0.648 | 0.598~0.702 | <0.001 |
| NMNAT2       | <0.001 | 0.705 | 0.661~0.752 | <0.001 |
| RAI14        | <0.001 | 1.694 | 1.537~1.867 | <0.001 |
| DOCK7        | <0.001 | 1.641 | 1.497~1.798 | <0.001 |
| SOBP         | <0.001 | 0.531 | 0.473~0.597 | <0.001 |
| ECM2         | <0.001 | 1.448 | 1.352~1.550 | <0.001 |
| KIF11        | <0.001 | 1.589 | 1.459~1.731 | <0.001 |
| SLC25A41     | <0.001 | 0.480 | 0.419~0.550 | <0.001 |
| REXO2        | <0.001 | 1.656 | 1.509~1.818 | <0.001 |
| XKR7         | <0.001 | 0.444 | 0.382~0.516 | <0.001 |
| S100PBP      | <0.001 | 2.025 | 1.778~2.307 | <0.001 |
| PIM3         | <0.001 | 1.786 | 1.604~1.987 | <0.001 |
| FADD         | <0.001 | 1.938 | 1.715~2.189 | <0.001 |
| KLHL4        | <0.001 | 1.540 | 1.422~1.668 | <0.001 |
| CANT1        | <0.001 | 1.825 | 1.634~2.040 | <0.001 |

|              |        |       |             |        |
|--------------|--------|-------|-------------|--------|
| RP1-153P14.3 | <0.001 | 0.387 | 0.325~0.462 | <0.001 |
| MORC4        | <0.001 | 1.969 | 1.738~2.231 | <0.001 |
| CTSZ         | <0.001 | 1.417 | 1.329~1.511 | <0.001 |
| MYL12A       | <0.001 | 1.407 | 1.321~1.498 | <0.001 |
| S100A4       | <0.001 | 1.268 | 1.214~1.325 | <0.001 |
| HK3          | <0.001 | 1.385 | 1.304~1.470 | <0.001 |
| HILPDA       | <0.001 | 1.408 | 1.322~1.499 | <0.001 |
| IL10RB       | <0.001 | 1.879 | 1.673~2.111 | <0.001 |
| MAP1LC3C     | <0.001 | 1.747 | 1.576~1.936 | <0.001 |
| CENPW        | <0.001 | 1.557 | 1.435~1.689 | <0.001 |
| TRIM67       | <0.001 | 0.629 | 0.578~0.685 | <0.001 |
| FSTL5        | <0.001 | 0.569 | 0.512~0.631 | <0.001 |
| INHBA-AS1    | <0.001 | 0.328 | 0.268~0.403 | <0.001 |
| VCL          | <0.001 | 1.559 | 1.436~1.691 | <0.001 |
| TGFBR1       | <0.001 | 1.690 | 1.535~1.862 | <0.001 |
| SLC22A17     | <0.001 | 0.671 | 0.623~0.722 | <0.001 |
| RP11-82C23.2 | <0.001 | 0.675 | 0.628~0.726 | <0.001 |
| CD109        | <0.001 | 1.705 | 1.546~1.881 | <0.001 |
| PLEKHG2      | <0.001 | 1.509 | 1.399~1.627 | <0.001 |
| MOB1A        | <0.001 | 1.810 | 1.623~2.019 | <0.001 |
| CADM2        | <0.001 | 0.714 | 0.671~0.760 | <0.001 |
| UNG          | <0.001 | 1.751 | 1.580~1.941 | <0.001 |
| CHEK1        | <0.001 | 1.620 | 1.482~1.770 | <0.001 |
| TES          | <0.001 | 1.600 | 1.468~1.744 | <0.001 |
| PHYHIPL      | <0.001 | 0.774 | 0.738~0.811 | <0.001 |
| FAM47E-STBD1 | <0.001 | 1.877 | 1.672~2.107 | <0.001 |
| EXT2         | <0.001 | 1.955 | 1.729~2.211 | <0.001 |
| HLF          | <0.001 | 0.662 | 0.614~0.714 | <0.001 |
| FUCA2        | <0.001 | 1.609 | 1.475~1.756 | <0.001 |
| LAP3         | <0.001 | 1.607 | 1.473~1.754 | <0.001 |
| OLFML2B      | <0.001 | 1.373 | 1.295~1.455 | <0.001 |
| RP11-357K6.1 | <0.001 | 0.631 | 0.579~0.686 | <0.001 |
| ARHGEF39     | <0.001 | 1.795 | 1.613~1.999 | <0.001 |
| NCAPG2       | <0.001 | 1.648 | 1.504~1.806 | <0.001 |
| BCR          | <0.001 | 0.615 | 0.562~0.672 | <0.001 |
| SEZ6L        | <0.001 | 0.774 | 0.739~0.811 | <0.001 |
| DTL          | <0.001 | 1.586 | 1.458~1.726 | <0.001 |
| AC005083.1   | <0.001 | 2.188 | 1.896~2.526 | <0.001 |
| SFT2D2       | <0.001 | 2.251 | 1.940~2.612 | <0.001 |
| HAR1B        | <0.001 | 0.357 | 0.296~0.431 | <0.001 |
| PGD          | <0.001 | 1.921 | 1.705~2.165 | <0.001 |
| ABLIM1       | <0.001 | 0.618 | 0.566~0.675 | <0.001 |
| METTL21B     | <0.001 | 1.381 | 1.302~1.465 | <0.001 |
| SPOCK2       | <0.001 | 0.670 | 0.623~0.721 | <0.001 |
| FKBP10       | <0.001 | 1.491 | 1.386~1.603 | <0.001 |
| CROT         | <0.001 | 1.704 | 1.546~1.878 | <0.001 |
| MUL1         | <0.001 | 2.112 | 1.842~2.421 | <0.001 |
| AF131216.5   | <0.001 | 0.638 | 0.588~0.693 | <0.001 |
| EZH2         | <0.001 | 1.496 | 1.390~1.610 | <0.001 |
| PHC2         | <0.001 | 1.897 | 1.687~2.132 | <0.001 |
| NOD1         | <0.001 | 1.879 | 1.675~2.109 | <0.001 |
| SERPINA5     | <0.001 | 1.343 | 1.273~1.417 | <0.001 |

|               |        |       |             |        |
|---------------|--------|-------|-------------|--------|
| TREM1         | <0.001 | 1.253 | 1.202~1.305 | <0.001 |
| ALDH2         | <0.001 | 0.744 | 0.705~0.785 | <0.001 |
| C8orf76       | <0.001 | 2.149 | 1.869~2.472 | <0.001 |
| WSCD2         | <0.001 | 0.586 | 0.531~0.646 | <0.001 |
| RLTPR         | <0.001 | 0.682 | 0.636~0.732 | <0.001 |
| NCSTN         | <0.001 | 1.757 | 1.585~1.947 | <0.001 |
| CPEB3         | <0.001 | 0.478 | 0.418~0.547 | <0.001 |
| SH3D21        | <0.001 | 1.635 | 1.494~1.788 | <0.001 |
| BTBD17        | <0.001 | 0.786 | 0.752~0.821 | <0.001 |
| MEX3D         | <0.001 | 1.573 | 1.448~1.708 | <0.001 |
| DIAPH3        | <0.001 | 2.112 | 1.843~2.421 | <0.001 |
| ADCYAP1R1     | <0.001 | 0.754 | 0.716~0.794 | <0.001 |
| DNAJB1        | <0.001 | 1.547 | 1.429~1.675 | <0.001 |
| CARD16        | <0.001 | 1.377 | 1.299~1.460 | <0.001 |
| FES           | <0.001 | 1.653 | 1.508~1.811 | <0.001 |
| ZNF850        | <0.001 | 2.883 | 2.377~3.497 | <0.001 |
| RP1-86C11.7   | <0.001 | 1.873 | 1.670~2.100 | <0.001 |
| ADAMTS1       | <0.001 | 1.462 | 1.364~1.567 | <0.001 |
| B3GNT5        | <0.001 | 1.627 | 1.489~1.777 | <0.001 |
| KDELR1        | <0.001 | 1.653 | 1.508~1.811 | <0.001 |
| MYH7          | <0.001 | 0.648 | 0.599~0.701 | <0.001 |
| MTBP          | <0.001 | 2.030 | 1.785~2.310 | <0.001 |
| CA4           | <0.001 | 0.715 | 0.672~0.760 | <0.001 |
| C2            | <0.001 | 1.396 | 1.314~1.483 | <0.001 |
| PIM1          | <0.001 | 1.597 | 1.466~1.738 | <0.001 |
| OSTC          | <0.001 | 1.547 | 1.429~1.675 | <0.001 |
| NKX3-2        | <0.001 | 1.639 | 1.498~1.793 | <0.001 |
| SFRP2         | <0.001 | 0.790 | 0.757~0.825 | <0.001 |
| DENND2D       | <0.001 | 1.474 | 1.374~1.582 | <0.001 |
| PCDH18        | <0.001 | 1.655 | 1.510~1.814 | <0.001 |
| ALG2          | <0.001 | 1.870 | 1.669~2.095 | <0.001 |
| LUM           | <0.001 | 1.251 | 1.201~1.302 | <0.001 |
| PCOLCE        | <0.001 | 1.320 | 1.255~1.389 | <0.001 |
| RP11-161M6.2  | <0.001 | 0.809 | 0.778~0.841 | <0.001 |
| AMER2         | <0.001 | 0.696 | 0.651~0.743 | <0.001 |
| LGALS3BP      | <0.001 | 1.598 | 1.468~1.740 | <0.001 |
| PSMC3IP       | <0.001 | 1.685 | 1.532~1.852 | <0.001 |
| RND2          | <0.001 | 0.698 | 0.654~0.745 | <0.001 |
| DTX3L         | <0.001 | 1.718 | 1.557~1.895 | <0.001 |
| PTPN12        | <0.001 | 1.666 | 1.518~1.827 | <0.001 |
| SERTAD3       | <0.001 | 1.664 | 1.517~1.825 | <0.001 |
| FAM20C        | <0.001 | 1.377 | 1.299~1.459 | <0.001 |
| LINGO1        | <0.001 | 0.757 | 0.719~0.796 | <0.001 |
| PSMC4         | <0.001 | 2.058 | 1.805~2.346 | <0.001 |
| SWAP70        | <0.001 | 1.615 | 1.481~1.762 | <0.001 |
| PPP1R8        | <0.001 | 2.440 | 2.075~2.868 | <0.001 |
| CTD-2521M24.9 | <0.001 | 1.686 | 1.534~1.854 | <0.001 |
| AC016773.1    | <0.001 | 2.065 | 1.810~2.355 | <0.001 |
| RP5-991G20.4  | <0.001 | 2.956 | 2.428~3.597 | <0.001 |
| OCIAD2        | <0.001 | 1.281 | 1.225~1.340 | <0.001 |
| DESI2         | <0.001 | 1.803 | 1.621~2.007 | <0.001 |
| SERINC2       | <0.001 | 1.425 | 1.337~1.520 | <0.001 |

|                  |        |       |             |        |
|------------------|--------|-------|-------------|--------|
| ZDHHC12          | <0.001 | 1.565 | 1.443~1.698 | <0.001 |
| SLC1A4           | <0.001 | 0.660 | 0.612~0.712 | <0.001 |
| SUSD2            | <0.001 | 1.503 | 1.396~1.618 | <0.001 |
| TLN1             | <0.001 | 1.777 | 1.601~1.972 | <0.001 |
| CPNE5            | <0.001 | 0.738 | 0.699~0.780 | <0.001 |
| FBXO42           | <0.001 | 2.075 | 1.818~2.368 | <0.001 |
| SNAI3-AS1        | <0.001 | 0.515 | 0.457~0.581 | <0.001 |
| RP11-285F16.1    | <0.001 | 0.636 | 0.586~0.690 | <0.001 |
| RIPPLY2          | <0.001 | 0.748 | 0.710~0.788 | <0.001 |
| LRGUK            | <0.001 | 2.329 | 1.999~2.713 | <0.001 |
| NRAS             | <0.001 | 1.886 | 1.682~2.115 | <0.001 |
| DACH2            | <0.001 | 0.561 | 0.505~0.623 | <0.001 |
| PAX3             | <0.001 | 1.571 | 1.448~1.705 | <0.001 |
| FAM181A          | <0.001 | 1.367 | 1.292~1.447 | <0.001 |
| CCBL1            | <0.001 | 0.607 | 0.554~0.664 | <0.001 |
| GIN52            | <0.001 | 1.556 | 1.437~1.686 | <0.001 |
| PNMAL2           | <0.001 | 0.635 | 0.585~0.689 | <0.001 |
| CDR2             | <0.001 | 1.902 | 1.694~2.136 | <0.001 |
| SMIM18           | <0.001 | 0.666 | 0.619~0.717 | <0.001 |
| RNFT1            | <0.001 | 1.602 | 1.471~1.744 | <0.001 |
| C9orf170         | <0.001 | 4.925 | 3.694~6.564 | <0.001 |
| ULK4             | <0.001 | 2.665 | 2.234~3.180 | <0.001 |
| FAM20A           | <0.001 | 1.357 | 1.284~1.434 | <0.001 |
| RP11-524D16__A.3 | <0.001 | 1.515 | 1.406~1.633 | <0.001 |
| LHFPL2           | <0.001 | 1.661 | 1.516~1.820 | <0.001 |
| CSTA             | <0.001 | 1.398 | 1.316~1.485 | <0.001 |
| AC053503.11      | <0.001 | 0.563 | 0.508~0.625 | <0.001 |
| HMGB2            | <0.001 | 1.409 | 1.325~1.499 | <0.001 |
| DPYD             | <0.001 | 1.449 | 1.355~1.549 | <0.001 |
| RPN1             | <0.001 | 2.297 | 1.978~2.668 | <0.001 |
| GABRG1           | <0.001 | 0.636 | 0.587~0.690 | <0.001 |
| PDCD1LG2         | <0.001 | 1.808 | 1.625~2.011 | <0.001 |
| TNFRSF1A         | <0.001 | 1.490 | 1.387~1.601 | <0.001 |
| AC147651.4       | <0.001 | 1.583 | 1.458~1.720 | <0.001 |
| FZD1             | <0.001 | 1.609 | 1.477~1.753 | <0.001 |
| SEMA4A           | <0.001 | 0.589 | 0.535~0.648 | <0.001 |
| GTPBP2           | <0.001 | 1.950 | 1.730~2.199 | <0.001 |
| TMEM234          | <0.001 | 2.047 | 1.799~2.328 | <0.001 |
| PSD2             | <0.001 | 0.723 | 0.682~0.766 | <0.001 |
| TICAM2           | <0.001 | 2.229 | 1.930~2.575 | <0.001 |
| KIAA2013         | <0.001 | 2.127 | 1.857~2.435 | <0.001 |
| CTA-268H5.14     | <0.001 | 0.389 | 0.329~0.461 | <0.001 |
| FOXJ3            | <0.001 | 1.853 | 1.658~2.070 | <0.001 |
| XKR8             | <0.001 | 1.672 | 1.525~1.834 | <0.001 |
| ARHGAP18         | <0.001 | 1.705 | 1.549~1.876 | <0.001 |
| SLC1A2           | <0.001 | 0.738 | 0.698~0.779 | <0.001 |
| PPP1R1A          | <0.001 | 0.753 | 0.716~0.793 | <0.001 |
| HTRA3            | <0.001 | 1.399 | 1.317~1.486 | <0.001 |
| SNAPC2           | <0.001 | 1.689 | 1.537~1.855 | <0.001 |
| EXOC3L2          | <0.001 | 1.546 | 1.430~1.672 | <0.001 |
| CTC-360G5.9      | <0.001 | 4.273 | 3.293~5.545 | <0.001 |
| SEL1L3           | <0.001 | 1.415 | 1.329~1.505 | <0.001 |



|                |        |       |             |        |
|----------------|--------|-------|-------------|--------|
| BMP2           | <0.001 | 0.716 | 0.674~0.760 | <0.001 |
| CTD-2267D19.6  | <0.001 | 4.981 | 3.735~6.642 | <0.001 |
| PELI3          | <0.001 | 0.557 | 0.502~0.619 | <0.001 |
| CTC-241F20.3   | <0.001 | 2.628 | 2.210~3.124 | <0.001 |
| RP11-783K16.10 | <0.001 | 0.487 | 0.428~0.554 | <0.001 |
| FREM2          | <0.001 | 1.599 | 1.470~1.739 | <0.001 |
| SPP1           | <0.001 | 1.250 | 1.201~1.301 | <0.001 |
| FRMPD1         | <0.001 | 0.372 | 0.311~0.444 | <0.001 |
| TM4SF1         | <0.001 | 1.410 | 1.326~1.500 | <0.001 |
| NEAT1          | <0.001 | 1.344 | 1.275~1.417 | <0.001 |
| SIPA1L3        | <0.001 | 1.864 | 1.668~2.084 | <0.001 |
| LEPREL1        | <0.001 | 1.519 | 1.409~1.637 | <0.001 |
| ABCA13         | <0.001 | 1.759 | 1.590~1.946 | <0.001 |
| TUB            | <0.001 | 0.658 | 0.611~0.709 | <0.001 |
| AL357673.1     | <0.001 | 2.345 | 2.014~2.731 | <0.001 |
| CHST2          | <0.001 | 1.526 | 1.415~1.645 | <0.001 |
| MCM10          | <0.001 | 1.658 | 1.515~1.815 | <0.001 |
| DDX60L         | <0.001 | 1.687 | 1.536~1.851 | <0.001 |
| GPBP1L1        | <0.001 | 1.968 | 1.744~2.221 | <0.001 |
| CNN3           | <0.001 | 1.434 | 1.344~1.529 | <0.001 |
| KCNN2          | <0.001 | 0.685 | 0.640~0.733 | <0.001 |
| KIF24          | <0.001 | 2.113 | 1.849~2.415 | <0.001 |
| ARHGDIG        | <0.001 | 0.784 | 0.751~0.819 | <0.001 |
| DUSP5          | <0.001 | 1.512 | 1.405~1.628 | <0.001 |
| FAM19A5        | <0.001 | 0.722 | 0.681~0.765 | <0.001 |
| TCEB3          | <0.001 | 2.134 | 1.864~2.443 | <0.001 |
| CAV1           | <0.001 | 1.354 | 1.283~1.429 | <0.001 |
| PLBD1          | <0.001 | 1.590 | 1.464~1.727 | <0.001 |
| PID1           | <0.001 | 0.700 | 0.657~0.746 | <0.001 |
| SKP2           | <0.001 | 2.062 | 1.813~2.345 | <0.001 |
| ERCC6L         | <0.001 | 2.165 | 1.887~2.484 | <0.001 |
| E2F4           | <0.001 | 2.644 | 2.224~3.143 | <0.001 |
| RAB3C          | <0.001 | 0.666 | 0.620~0.716 | <0.001 |
| F3             | <0.001 | 1.432 | 1.343~1.526 | <0.001 |
| KCNN1          | <0.001 | 0.673 | 0.627~0.722 | <0.001 |
| LUZP2          | <0.001 | 0.751 | 0.713~0.790 | <0.001 |
| ADAMTSL4       | <0.001 | 1.402 | 1.320~1.489 | <0.001 |
| FANCD2         | <0.001 | 1.599 | 1.471~1.738 | <0.001 |
| CDCA7          | <0.001 | 1.506 | 1.400~1.620 | <0.001 |
| STK38          | <0.001 | 2.067 | 1.817~2.351 | <0.001 |
| PDK3           | <0.001 | 1.904 | 1.699~2.135 | <0.001 |
| MKNK2          | <0.001 | 1.786 | 1.611~1.980 | <0.001 |
| ZDHHC5         | <0.001 | 2.509 | 2.131~2.954 | <0.001 |
| RP1-63G5.5     | <0.001 | 0.338 | 0.279~0.410 | <0.001 |
| ULBP2          | <0.001 | 2.020 | 1.783~2.288 | <0.001 |
| LRIT2          | <0.001 | 0.185 | 0.138~0.250 | <0.001 |
| CLVS1          | <0.001 | 0.547 | 0.491~0.609 | <0.001 |
| FOSL2          | <0.001 | 1.446 | 1.355~1.544 | <0.001 |
| GSAP           | <0.001 | 1.559 | 1.441~1.687 | <0.001 |
| KNTC1          | <0.001 | 1.506 | 1.400~1.619 | <0.001 |
| ST8SIA3        | <0.001 | 0.762 | 0.726~0.800 | <0.001 |
| GPR123         | <0.001 | 0.685 | 0.640~0.732 | <0.001 |

|           |        |       |             |        |
|-----------|--------|-------|-------------|--------|
| RHOC      | <0.001 | 1.614 | 1.483~1.757 | <0.001 |
| PRR11     | <0.001 | 1.573 | 1.452~1.705 | <0.001 |
| VANGL1    | <0.001 | 2.213 | 1.923~2.548 | <0.001 |
| HYAL2     | <0.001 | 1.817 | 1.635~2.020 | <0.001 |
| CCDC77    | <0.001 | 1.924 | 1.714~2.160 | <0.001 |
| EPST11    | <0.001 | 1.593 | 1.467~1.730 | <0.001 |
| SPRY4     | <0.001 | 1.371 | 1.297~1.450 | <0.001 |
| SPPL2A    | <0.001 | 1.926 | 1.715~2.163 | <0.001 |
| EN2       | <0.001 | 1.602 | 1.474~1.742 | <0.001 |
| ANG       | <0.001 | 1.501 | 1.397~1.612 | <0.001 |
| CASKIN1   | <0.001 | 0.713 | 0.671~0.757 | <0.001 |
| CKMT1A    | <0.001 | 0.726 | 0.686~0.768 | <0.001 |
| 4-Mar     | <0.001 | 0.568 | 0.514~0.627 | <0.001 |
| SNRPN     | <0.001 | 0.694 | 0.650~0.740 | <0.001 |
| KCNE4     | <0.001 | 1.439 | 1.350~1.535 | <0.001 |
| ATP6V1G2  | <0.001 | 0.761 | 0.725~0.799 | <0.001 |
| ABCA17P   | <0.001 | 0.522 | 0.466~0.586 | <0.001 |
| 3-Sep     | <0.001 | 0.740 | 0.702~0.780 | <0.001 |
| NUMBL     | <0.001 | 1.738 | 1.576~1.916 | <0.001 |
| SHANK2    | <0.001 | 0.642 | 0.594~0.694 | <0.001 |
| GABRG2    | <0.001 | 0.703 | 0.661~0.748 | <0.001 |
| ZNF230    | <0.001 | 2.281 | 1.972~2.638 | <0.001 |
| ADPRHL2   | <0.001 | 1.924 | 1.714~2.160 | <0.001 |
| NKX6-1    | <0.001 | 1.566 | 1.447~1.695 | <0.001 |
| C5orf34   | <0.001 | 2.128 | 1.863~2.431 | <0.001 |
| MED8      | <0.001 | 2.150 | 1.878~2.461 | <0.001 |
| LPPR3     | <0.001 | 0.761 | 0.725~0.799 | <0.001 |
| NRXN1     | <0.001 | 0.723 | 0.683~0.765 | <0.001 |
| MYT1L     | <0.001 | 0.702 | 0.659~0.747 | <0.001 |
| FOSL1     | <0.001 | 1.448 | 1.356~1.545 | <0.001 |
| PGM2      | <0.001 | 1.844 | 1.656~2.054 | <0.001 |
| CORO6     | <0.001 | 0.695 | 0.652~0.741 | <0.001 |
| NID2      | <0.001 | 1.542 | 1.429~1.664 | <0.001 |
| DUSP6     | <0.001 | 1.434 | 1.346~1.528 | <0.001 |
| CLEC18A   | <0.001 | 1.502 | 1.399~1.614 | <0.001 |
| SLC25A43  | <0.001 | 1.799 | 1.623~1.995 | <0.001 |
| SLC35D1   | <0.001 | 1.956 | 1.738~2.201 | <0.001 |
| EFNB2     | <0.001 | 1.586 | 1.463~1.720 | <0.001 |
| CASP7     | <0.001 | 1.745 | 1.582~1.924 | <0.001 |
| RNF135    | <0.001 | 1.556 | 1.439~1.681 | <0.001 |
| SIX5      | <0.001 | 1.572 | 1.452~1.702 | <0.001 |
| YTHDF2    | <0.001 | 2.146 | 1.877~2.455 | <0.001 |
| ADARB2    | <0.001 | 0.699 | 0.656~0.744 | <0.001 |
| FZD6      | <0.001 | 1.621 | 1.489~1.764 | <0.001 |
| SPATA17   | <0.001 | 1.614 | 1.484~1.755 | <0.001 |
| USH1C     | <0.001 | 0.774 | 0.739~0.809 | <0.001 |
| NPNT      | <0.001 | 1.368 | 1.295~1.445 | <0.001 |
| KHNYN     | <0.001 | 1.628 | 1.494~1.773 | <0.001 |
| TYMS      | <0.001 | 1.414 | 1.330~1.502 | <0.001 |
| LINC00669 | <0.001 | 2.690 | 2.262~3.200 | <0.001 |
| WISP1     | <0.001 | 1.487 | 1.387~1.594 | <0.001 |
| CD151     | <0.001 | 1.564 | 1.446~1.691 | <0.001 |

|                |        |       |             |        |
|----------------|--------|-------|-------------|--------|
| PAFAH2         | <0.001 | 2.478 | 2.114~2.905 | <0.001 |
| HIVEP3         | <0.001 | 1.937 | 1.725~2.175 | <0.001 |
| TOE1           | <0.001 | 2.398 | 2.057~2.795 | <0.001 |
| RP11-155G14.5  | <0.001 | 1.456 | 1.363~1.555 | <0.001 |
| CTD-2127H9.1   | <0.001 | 2.710 | 2.275~3.227 | <0.001 |
| KIAA1755       | <0.001 | 0.677 | 0.632~0.725 | <0.001 |
| CUX2           | <0.001 | 0.583 | 0.530~0.641 | <0.001 |
| LGALS3         | <0.001 | 1.310 | 1.250~1.374 | <0.001 |
| CTBS           | <0.001 | 1.803 | 1.626~1.999 | <0.001 |
| FZD5           | <0.001 | 1.854 | 1.664~2.066 | <0.001 |
| REEP6          | <0.001 | 0.687 | 0.643~0.734 | <0.001 |
| MAD2L1         | <0.001 | 1.514 | 1.408~1.628 | <0.001 |
| PRMT6          | <0.001 | 1.919 | 1.712~2.150 | <0.001 |
| HSD3B7         | <0.001 | 1.698 | 1.548~1.862 | <0.001 |
| CDC45          | <0.001 | 1.489 | 1.389~1.597 | <0.001 |
| NAMPTL         | <0.001 | 1.472 | 1.376~1.574 | <0.001 |
| FBXO17         | <0.001 | 1.473 | 1.377~1.576 | <0.001 |
| APOBEC3C       | <0.001 | 1.560 | 1.444~1.686 | <0.001 |
| UNC13A         | <0.001 | 0.667 | 0.622~0.716 | <0.001 |
| TCF19          | <0.001 | 1.654 | 1.515~1.806 | <0.001 |
| HIST2H2AA4     | <0.001 | 1.325 | 1.261~1.391 | <0.001 |
| KIAA0226L      | <0.001 | 1.528 | 1.419~1.645 | <0.001 |
| GPR17          | <0.001 | 0.774 | 0.741~0.810 | <0.001 |
| CPLX1          | <0.001 | 0.787 | 0.755~0.821 | <0.001 |
| GRB14          | <0.001 | 1.416 | 1.333~1.505 | <0.001 |
| RP11-1134I14.8 | <0.001 | 0.503 | 0.446~0.567 | <0.001 |
| GALM           | <0.001 | 1.908 | 1.705~2.135 | <0.001 |
| LTF            | <0.001 | 1.158 | 1.129~1.188 | <0.001 |
| MGAT4C         | <0.001 | 0.554 | 0.499~0.614 | <0.001 |
| NOX4           | <0.001 | 1.536 | 1.425~1.655 | <0.001 |
| ADAM19         | <0.001 | 1.633 | 1.499~1.778 | <0.001 |
| AC099522.1     | <0.001 | 1.452 | 1.360~1.549 | <0.001 |
| LRRC42         | <0.001 | 1.845 | 1.659~2.053 | <0.001 |
| MAN1C1         | <0.001 | 1.396 | 1.317~1.479 | <0.001 |
| LIF            | <0.001 | 1.346 | 1.278~1.418 | <0.001 |
| RP3-466P17.1   | <0.001 | 0.440 | 0.381~0.507 | <0.001 |
| GALNT3         | <0.001 | 1.737 | 1.578~1.912 | <0.001 |
| SCD            | <0.001 | 0.720 | 0.681~0.763 | <0.001 |
| GRIN1          | <0.001 | 0.819 | 0.791~0.848 | <0.001 |
| RP11-1C8.7     | <0.001 | 0.664 | 0.618~0.713 | <0.001 |
| RP11-227B21.2  | <0.001 | 0.693 | 0.650~0.739 | <0.001 |
| NEXN           | <0.001 | 1.649 | 1.512~1.799 | <0.001 |
| HECTD3         | <0.001 | 2.232 | 1.941~2.566 | <0.001 |
| AC004067.5     | <0.001 | 2.152 | 1.884~2.458 | <0.001 |
| MBOAT1         | <0.001 | 1.853 | 1.665~2.063 | <0.001 |
| CHRNA4         | <0.001 | 0.630 | 0.581~0.682 | <0.001 |
| MCF2           | <0.001 | 0.522 | 0.466~0.585 | <0.001 |
| LDHD           | <0.001 | 0.636 | 0.588~0.688 | <0.001 |
| LRRN4CL        | <0.001 | 1.512 | 1.407~1.625 | <0.001 |
| CNRIP1         | <0.001 | 0.706 | 0.665~0.750 | <0.001 |
| ZNF367         | <0.001 | 1.730 | 1.573~1.903 | <0.001 |
| THRAP3         | <0.001 | 2.217 | 1.931~2.546 | <0.001 |

|               |        |       |             |        |
|---------------|--------|-------|-------------|--------|
| CP            | <0.001 | 1.275 | 1.222~1.330 | <0.001 |
| WWTR1         | <0.001 | 1.428 | 1.343~1.520 | <0.001 |
| SRSF4         | <0.001 | 1.686 | 1.540~1.845 | <0.001 |
| MTFR2         | <0.001 | 1.980 | 1.759~2.229 | <0.001 |
| CA10          | <0.001 | 0.743 | 0.705~0.782 | <0.001 |
| GRWD1         | <0.001 | 1.867 | 1.676~2.080 | <0.001 |
| RP11-181E10.3 | <0.001 | 5.710 | 4.223~7.721 | <0.001 |
| RP11-423G4.7  | <0.001 | 0.434 | 0.376~0.502 | <0.001 |
| SH3GL2        | <0.001 | 0.757 | 0.722~0.795 | <0.001 |
| EME1          | <0.001 | 1.613 | 1.485~1.753 | <0.001 |
| PTCHD2        | <0.001 | 0.693 | 0.651~0.739 | <0.001 |
| SCAMP5        | <0.001 | 0.660 | 0.614~0.709 | <0.001 |
| TWIST1        | <0.001 | 1.391 | 1.314~1.473 | <0.001 |
| EML4          | <0.001 | 2.087 | 1.838~2.371 | <0.001 |
| POC1A         | <0.001 | 1.745 | 1.585~1.922 | <0.001 |
| SMPD3         | <0.001 | 0.586 | 0.535~0.643 | <0.001 |
| FMOD          | <0.001 | 1.326 | 1.263~1.392 | <0.001 |
| SURF4         | <0.001 | 2.113 | 1.857~2.405 | <0.001 |
| MLTK          | <0.001 | 1.744 | 1.584~1.920 | <0.001 |
| CLIC4         | <0.001 | 1.529 | 1.421~1.646 | <0.001 |
| RP11-513M16.7 | <0.001 | 0.620 | 0.571~0.673 | <0.001 |
| YBX3          | <0.001 | 1.500 | 1.399~1.609 | <0.001 |
| DPH2          | <0.001 | 2.221 | 1.936~2.549 | <0.001 |
| ADPRH         | <0.001 | 1.718 | 1.565~1.886 | <0.001 |
| PCCA          | <0.001 | 0.474 | 0.417~0.539 | <0.001 |
| RP11-479G22.8 | <0.001 | 2.449 | 2.098~2.857 | <0.001 |
| ATF5          | <0.001 | 1.566 | 1.449~1.692 | <0.001 |
| TMEM106C      | <0.001 | 1.640 | 1.506~1.786 | <0.001 |
| KDELC2        | <0.001 | 1.636 | 1.503~1.781 | <0.001 |
| GLB1          | <0.001 | 2.125 | 1.866~2.420 | <0.001 |
| NANP          | <0.001 | 2.631 | 2.227~3.108 | <0.001 |
| NEDD1         | <0.001 | 1.799 | 1.626~1.991 | <0.001 |
| ANXA5         | <0.001 | 1.502 | 1.400~1.611 | <0.001 |
| OTP           | <0.001 | 1.579 | 1.459~1.708 | <0.001 |
| ERF           | <0.001 | 1.774 | 1.607~1.958 | <0.001 |
| MBNL3         | <0.001 | 2.138 | 1.876~2.436 | <0.001 |
| PLAGL2        | <0.001 | 2.000 | 1.775~2.253 | <0.001 |
| IQSEC3        | <0.001 | 0.701 | 0.659~0.745 | <0.001 |
| LRRC41        | <0.001 | 2.294 | 1.989~2.646 | <0.001 |
| KIF21B        | <0.001 | 0.657 | 0.612~0.707 | <0.001 |
| TMEM159       | <0.001 | 1.742 | 1.583~1.916 | <0.001 |
| MBD2          | <0.001 | 1.996 | 1.772~2.247 | <0.001 |
| SYN1          | <0.001 | 0.754 | 0.718~0.791 | <0.001 |
| CYFIP2        | <0.001 | 0.685 | 0.642~0.731 | <0.001 |
| MIR219-2      | <0.001 | 0.778 | 0.745~0.812 | <0.001 |
| BORA          | <0.001 | 2.044 | 1.808~2.311 | <0.001 |
| GEM           | <0.001 | 1.418 | 1.335~1.505 | <0.001 |
| RP11-74E22.4  | <0.001 | 0.570 | 0.517~0.628 | <0.001 |
| NUAK2         | <0.001 | 1.709 | 1.559~1.874 | <0.001 |
| C10orf10      | <0.001 | 1.429 | 1.344~1.519 | <0.001 |
| BCL3          | <0.001 | 1.428 | 1.343~1.518 | <0.001 |
| LRRC20        | <0.001 | 0.573 | 0.521~0.631 | <0.001 |

|               |        |       |             |        |
|---------------|--------|-------|-------------|--------|
| PPP1R3B       | <0.001 | 1.818 | 1.641~2.014 | <0.001 |
| CBLN1         | <0.001 | 0.633 | 0.586~0.685 | <0.001 |
| LRR1          | <0.001 | 1.866 | 1.677~2.076 | <0.001 |
| CDH20         | <0.001 | 0.675 | 0.631~0.722 | <0.001 |
| RP11-303E16.2 | <0.001 | 1.673 | 1.532~1.827 | <0.001 |
| MGME1         | <0.001 | 1.942 | 1.734~2.176 | <0.001 |
| CD97          | <0.001 | 1.556 | 1.442~1.678 | <0.001 |
| SRRM3         | <0.001 | 0.724 | 0.686~0.765 | <0.001 |
| AJUBA         | <0.001 | 1.736 | 1.580~1.908 | <0.001 |
| CXCL10        | <0.001 | 1.359 | 1.290~1.433 | <0.001 |
| COL6A3        | <0.001 | 1.283 | 1.229~1.339 | <0.001 |
| FCHSD1        | <0.001 | 1.773 | 1.608~1.955 | <0.001 |
| C15orf59      | <0.001 | 0.730 | 0.692~0.771 | <0.001 |
| PSD           | <0.001 | 0.735 | 0.697~0.775 | <0.001 |
| LINC00599     | <0.001 | 0.729 | 0.691~0.770 | <0.001 |
| NALCN         | <0.001 | 0.622 | 0.573~0.674 | <0.001 |
| ITPK1         | <0.001 | 0.656 | 0.611~0.705 | <0.001 |
| SLC10A3       | <0.001 | 1.925 | 1.722~2.153 | <0.001 |
| FLRT1         | <0.001 | 0.621 | 0.572~0.673 | <0.001 |
| CTC-462L7.1   | <0.001 | 2.500 | 2.138~2.923 | <0.001 |
| RP11-307B6.3  | <0.001 | 0.699 | 0.658~0.743 | <0.001 |
| ERI1          | <0.001 | 1.944 | 1.735~2.177 | <0.001 |
| ZNF790        | <0.001 | 2.162 | 1.896~2.466 | <0.001 |
| RIT1          | <0.001 | 1.871 | 1.682~2.082 | <0.001 |
| VASN          | <0.001 | 1.379 | 1.305~1.457 | <0.001 |
| HELZ2         | <0.001 | 1.632 | 1.501~1.774 | <0.001 |
| ACSL6         | <0.001 | 0.686 | 0.644~0.732 | <0.001 |
| FAM109B       | <0.001 | 1.746 | 1.588~1.919 | <0.001 |
| LBX2-AS1      | <0.001 | 1.884 | 1.692~2.099 | <0.001 |
| FANCI         | <0.001 | 1.539 | 1.430~1.656 | <0.001 |
| RP5-997D16.2  | <0.001 | 2.922 | 2.435~3.507 | <0.001 |
| ZNF473        | <0.001 | 1.857 | 1.671~2.063 | <0.001 |
| GABRD         | <0.001 | 0.739 | 0.701~0.778 | <0.001 |
| ANXA2P2       | <0.001 | 1.969 | 1.754~2.209 | <0.001 |
| DIRAS3        | <0.001 | 1.425 | 1.342~1.513 | <0.001 |
| PPP1R15A      | <0.001 | 1.616 | 1.489~1.753 | <0.001 |
| GPR65         | <0.001 | 1.601 | 1.478~1.735 | <0.001 |
| SLC47A2       | <0.001 | 1.354 | 1.286~1.426 | <0.001 |
| TDH           | <0.001 | 0.425 | 0.368~0.492 | <0.001 |
| ST6GAL2       | <0.001 | 0.641 | 0.595~0.692 | <0.001 |
| FYCO1         | <0.001 | 2.538 | 2.167~2.973 | <0.001 |
| ULBP1         | <0.001 | 2.151 | 1.889~2.450 | <0.001 |
| CKMT1B        | <0.001 | 0.722 | 0.683~0.763 | <0.001 |
| KTI12         | <0.001 | 2.127 | 1.871~2.418 | <0.001 |
| GPNMB         | <0.001 | 1.276 | 1.225~1.330 | <0.001 |
| RASGEF1C      | <0.001 | 0.661 | 0.616~0.709 | <0.001 |
| AC007375.1    | <0.001 | 0.234 | 0.183~0.300 | <0.001 |
| SH2D4A        | <0.001 | 1.683 | 1.541~1.838 | <0.001 |
| PLOD3         | <0.001 | 1.827 | 1.650~2.024 | <0.001 |
| FAM111A       | <0.001 | 1.671 | 1.532~1.824 | <0.001 |
| MAP7D3        | <0.001 | 2.061 | 1.823~2.330 | <0.001 |
| FAM115C       | <0.001 | 1.917 | 1.716~2.140 | <0.001 |

|               |        |       |             |        |
|---------------|--------|-------|-------------|--------|
| FPGT          | <0.001 | 1.910 | 1.712~2.131 | <0.001 |
| DCTD          | <0.001 | 1.692 | 1.548~1.850 | <0.001 |
| PHF13         | <0.001 | 2.230 | 1.946~2.554 | <0.001 |
| S1PR3         | <0.001 | 1.460 | 1.370~1.557 | <0.001 |
| C1R           | <0.001 | 1.307 | 1.249~1.368 | <0.001 |
| SLC1A6        | <0.001 | 0.662 | 0.617~0.710 | <0.001 |
| MAP2K3        | <0.001 | 1.741 | 1.585~1.913 | <0.001 |
| ELK3          | <0.001 | 1.764 | 1.602~1.942 | <0.001 |
| MYO1B         | <0.001 | 1.506 | 1.405~1.614 | <0.001 |
| ICMT          | <0.001 | 2.307 | 2.003~2.658 | <0.001 |
| CKS2          | <0.001 | 1.429 | 1.346~1.518 | <0.001 |
| TXLNB         | <0.001 | 1.809 | 1.637~2.000 | <0.001 |
| DCLRE1B       | <0.001 | 2.154 | 1.892~2.452 | <0.001 |
| WARS2         | <0.001 | 2.606 | 2.217~3.063 | <0.001 |
| RP11-834C11.4 | <0.001 | 1.635 | 1.505~1.776 | <0.001 |
| GABRA3        | <0.001 | 0.662 | 0.618~0.710 | <0.001 |
| HFE           | <0.001 | 1.827 | 1.651~2.023 | <0.001 |
| GRIN2C        | <0.001 | 0.650 | 0.604~0.699 | <0.001 |
| CHRN2         | <0.001 | 0.596 | 0.546~0.650 | <0.001 |
| RP11-61L23.2  | <0.001 | 1.502 | 1.403~1.609 | <0.001 |
| HIST2H2BE     | <0.001 | 1.580 | 1.463~1.706 | <0.001 |
| WNT7B         | <0.001 | 0.660 | 0.616~0.708 | <0.001 |
| ABCC1         | <0.001 | 1.830 | 1.653~2.027 | <0.001 |
| TNFRSF19      | <0.001 | 1.549 | 1.439~1.668 | <0.001 |
| CD163         | <0.001 | 1.262 | 1.214~1.312 | <0.001 |
| ATCAY         | <0.001 | 0.767 | 0.734~0.802 | <0.001 |
| PDLIM3        | <0.001 | 1.506 | 1.406~1.614 | <0.001 |
| ADPGK         | <0.001 | 2.282 | 1.986~2.621 | <0.001 |
| MYCBP         | <0.001 | 1.837 | 1.658~2.034 | <0.001 |
| TEAD4         | <0.001 | 1.465 | 1.374~1.562 | <0.001 |
| G0S2          | <0.001 | 1.292 | 1.237~1.348 | <0.001 |
| S100A11       | <0.001 | 1.339 | 1.275~1.406 | <0.001 |
| RP11-245J24.1 | <0.001 | 0.529 | 0.475~0.589 | <0.001 |
| ULBP3         | <0.001 | 2.323 | 2.016~2.676 | <0.001 |
| OLFML2A       | <0.001 | 1.563 | 1.450~1.685 | <0.001 |
| FAM72D        | <0.001 | 2.099 | 1.853~2.378 | <0.001 |
| DISP2         | <0.001 | 0.667 | 0.623~0.714 | <0.001 |
| PLSCR1        | <0.001 | 1.492 | 1.395~1.596 | <0.001 |
| CMTM6         | <0.001 | 1.810 | 1.638~1.999 | <0.001 |
| ACTL6A        | <0.001 | 1.862 | 1.678~2.067 | <0.001 |
| ANTXR2        | <0.001 | 1.658 | 1.523~1.805 | <0.001 |
| PHACTR4       | <0.001 | 2.110 | 1.862~2.392 | <0.001 |
| INA           | <0.001 | 0.762 | 0.728~0.797 | <0.001 |
| WDR86         | <0.001 | 0.660 | 0.615~0.707 | <0.001 |
| MYO1C         | <0.001 | 1.891 | 1.699~2.104 | <0.001 |
| EPHA10        | <0.001 | 0.537 | 0.484~0.596 | <0.001 |
| SAMD9         | <0.001 | 1.772 | 1.610~1.950 | <0.001 |
| RP4-730K3.3   | <0.001 | 1.903 | 1.709~2.120 | <0.001 |
| APOBEC3G      | <0.001 | 1.621 | 1.495~1.758 | <0.001 |
| CNTRL         | <0.001 | 2.103 | 1.857~2.382 | <0.001 |
| TMEM165       | <0.001 | 1.599 | 1.478~1.729 | <0.001 |
| GNS           | <0.001 | 1.571 | 1.457~1.695 | <0.001 |

|               |        |       |             |        |
|---------------|--------|-------|-------------|--------|
| YPEL4         | <0.001 | 0.646 | 0.600~0.695 | <0.001 |
| MAPT-AS1      | <0.001 | 0.644 | 0.599~0.694 | <0.001 |
| PKIB          | <0.001 | 1.392 | 1.317~1.471 | <0.001 |
| FILIP1L       | <0.001 | 1.534 | 1.428~1.647 | <0.001 |
| BCL10         | <0.001 | 2.371 | 2.052~2.739 | <0.001 |
| CCNJL         | <0.001 | 1.954 | 1.747~2.185 | <0.001 |
| NUP62         | <0.001 | 1.965 | 1.756~2.200 | <0.001 |
| RP11-558F24.4 | <0.001 | 1.801 | 1.633~1.987 | <0.001 |
| ETNPPL        | <0.001 | 0.794 | 0.764~0.825 | <0.001 |
| PLA2G2A       | <0.001 | 1.201 | 1.165~1.239 | <0.001 |
| PLK3          | <0.001 | 1.639 | 1.509~1.780 | <0.001 |
| CD44          | <0.001 | 1.351 | 1.285~1.420 | <0.001 |
| CHSY1         | <0.001 | 1.770 | 1.609~1.947 | <0.001 |
| JPH4          | <0.001 | 0.748 | 0.713~0.785 | <0.001 |
| NDUFA6-AS1    | <0.001 | 0.502 | 0.448~0.563 | <0.001 |
| SF3A3         | <0.001 | 1.971 | 1.760~2.207 | <0.001 |
| PTBP3         | <0.001 | 2.129 | 1.877~2.414 | <0.001 |
| RP1-74M1.3    | <0.001 | 1.583 | 1.466~1.708 | <0.001 |
| ZNF217        | <0.001 | 1.724 | 1.575~1.888 | <0.001 |
| IRX5          | <0.001 | 1.559 | 1.448~1.679 | <0.001 |
| STK3          | <0.001 | 2.118 | 1.870~2.400 | <0.001 |
| PCBP3         | <0.001 | 0.643 | 0.598~0.692 | <0.001 |
| SYNC          | <0.001 | 1.626 | 1.500~1.763 | <0.001 |
| VSTM2A        | <0.001 | 0.722 | 0.683~0.762 | <0.001 |
| REEP4         | <0.001 | 1.848 | 1.669~2.047 | <0.001 |
| HIP1R         | <0.001 | 0.676 | 0.634~0.722 | <0.001 |
| DLGAP1        | <0.001 | 0.676 | 0.634~0.722 | <0.001 |
| RP11-155G14.6 | <0.001 | 1.642 | 1.512~1.782 | <0.001 |
| SOCS2         | <0.001 | 1.419 | 1.339~1.504 | <0.001 |
| KANK2         | <0.001 | 1.589 | 1.472~1.716 | <0.001 |
| ZBTB42        | <0.001 | 1.677 | 1.540~1.827 | <0.001 |
| KDM4A         | <0.001 | 2.156 | 1.898~2.448 | <0.001 |
| DPP9          | <0.001 | 2.397 | 2.074~2.770 | <0.001 |
| ARL4C         | <0.001 | 1.516 | 1.415~1.625 | <0.001 |
| RP11-118K6.3  | <0.001 | 0.582 | 0.533~0.637 | <0.001 |
| ESM1          | <0.001 | 1.307 | 1.250~1.366 | <0.001 |
| CHI3L2        | <0.001 | 1.200 | 1.164~1.236 | <0.001 |
| KIAA0101      | <0.001 | 1.433 | 1.350~1.521 | <0.001 |
| MCM3          | <0.001 | 1.762 | 1.604~1.935 | <0.001 |
| FAM111B       | <0.001 | 1.692 | 1.551~1.846 | <0.001 |
| SOD2          | <0.001 | 1.329 | 1.268~1.393 | <0.001 |
| POLD3         | <0.001 | 2.177 | 1.915~2.476 | <0.001 |
| UNC5A         | <0.001 | 0.671 | 0.628~0.717 | <0.001 |
| STAC          | <0.001 | 1.572 | 1.459~1.694 | <0.001 |
| SNAI2         | <0.001 | 1.559 | 1.449~1.678 | <0.001 |
| H6PD          | <0.001 | 2.073 | 1.838~2.338 | <0.001 |
| DSCAML1       | <0.001 | 0.650 | 0.605~0.698 | <0.001 |
| RP11-698N11.2 | <0.001 | 1.524 | 1.422~1.634 | <0.001 |
| C7orf31       | <0.001 | 1.989 | 1.775~2.228 | <0.001 |
| EVC           | <0.001 | 1.696 | 1.554~1.850 | <0.001 |
| ATP9A         | <0.001 | 0.595 | 0.546~0.648 | <0.001 |
| RP11-443B20.1 | <0.001 | 1.888 | 1.700~2.097 | <0.001 |

|              |        |       |             |        |
|--------------|--------|-------|-------------|--------|
| STC1         | <0.001 | 1.499 | 1.402~1.603 | <0.001 |
| SMS          | <0.001 | 1.663 | 1.529~1.808 | <0.001 |
| TOP2A        | <0.001 | 1.345 | 1.281~1.412 | <0.001 |
| AKR1C3       | <0.001 | 0.719 | 0.681~0.759 | <0.001 |
| GADD45A      | <0.001 | 1.398 | 1.323~1.477 | <0.001 |
| TRAF5        | <0.001 | 1.891 | 1.703~2.101 | <0.001 |
| MKI67        | <0.001 | 1.552 | 1.444~1.669 | <0.001 |
| PBK          | <0.001 | 1.444 | 1.359~1.534 | <0.001 |
| ESCO2        | <0.001 | 1.840 | 1.665~2.035 | <0.001 |
| NMI          | <0.001 | 1.690 | 1.550~1.843 | <0.001 |
| CNPY4        | <0.001 | 2.024 | 1.802~2.273 | <0.001 |
| RAP2B        | <0.001 | 2.019 | 1.799~2.267 | <0.001 |
| RAD51AP1     | <0.001 | 1.546 | 1.439~1.661 | <0.001 |
| GINS4        | <0.001 | 1.849 | 1.671~2.046 | <0.001 |
| SLC43A3      | <0.001 | 1.518 | 1.418~1.626 | <0.001 |
| PLEK2        | <0.001 | 1.656 | 1.524~1.800 | <0.001 |
| ELF4         | <0.001 | 1.789 | 1.626~1.969 | <0.001 |
| RP11-415J8.3 | <0.001 | 2.011 | 1.792~2.255 | <0.001 |
| CASC5        | <0.001 | 1.758 | 1.602~1.929 | <0.001 |
| BICD1        | <0.001 | 1.656 | 1.524~1.799 | <0.001 |
| HAS2         | <0.001 | 1.617 | 1.494~1.750 | <0.001 |
| AC010441.1   | <0.001 | 1.474 | 1.383~1.571 | <0.001 |
| C1RL         | <0.001 | 1.490 | 1.396~1.591 | <0.001 |
| ST8SIA4      | <0.001 | 1.870 | 1.688~2.072 | <0.001 |
| XRCC2        | <0.001 | 1.907 | 1.715~2.119 | <0.001 |
| BTN2A3P      | <0.001 | 2.125 | 1.878~2.405 | <0.001 |
| OIP5         | <0.001 | 1.748 | 1.595~1.915 | <0.001 |
| SSTR2        | <0.001 | 0.610 | 0.562~0.661 | <0.001 |
| CRYZ         | <0.001 | 1.675 | 1.539~1.823 | <0.001 |
| SEPN1        | <0.001 | 1.703 | 1.561~1.858 | <0.001 |
| SYT15        | <0.001 | 0.507 | 0.453~0.566 | <0.001 |
| TNFRSF11B    | <0.001 | 1.543 | 1.437~1.656 | <0.001 |
| FCGR3A       | <0.001 | 1.371 | 1.302~1.444 | <0.001 |
| RP4-792G4.2  | <0.001 | 1.326 | 1.266~1.389 | <0.001 |
| MXRA5        | <0.001 | 1.507 | 1.409~1.612 | <0.001 |
| CASP2        | <0.001 | 1.988 | 1.776~2.224 | <0.001 |
| LOX          | <0.001 | 1.348 | 1.284~1.415 | <0.001 |
| CALD1        | <0.001 | 1.536 | 1.432~1.648 | <0.001 |
| TM7SF2       | <0.001 | 0.646 | 0.602~0.694 | <0.001 |
| NTNG2        | <0.001 | 0.639 | 0.593~0.687 | <0.001 |
| TMEM194A     | <0.001 | 1.757 | 1.603~1.927 | <0.001 |
| DNAJC22      | <0.001 | 2.001 | 1.786~2.241 | <0.001 |
| CCNF         | <0.001 | 2.082 | 1.847~2.347 | <0.001 |
| PRSS23       | <0.001 | 1.401 | 1.326~1.480 | <0.001 |
| RHOJ         | <0.001 | 1.589 | 1.473~1.713 | <0.001 |
| TPM4         | <0.001 | 1.631 | 1.506~1.767 | <0.001 |
| AAED1        | <0.001 | 2.333 | 2.032~2.679 | <0.001 |
| TMEM151B     | <0.001 | 0.685 | 0.644~0.728 | <0.001 |
| CC2D1B       | <0.001 | 2.493 | 2.148~2.893 | <0.001 |
| WIPI1        | <0.001 | 1.825 | 1.655~2.013 | <0.001 |
| LINC01057    | <0.001 | 1.860 | 1.681~2.058 | <0.001 |
| SPHKAP       | <0.001 | 0.524 | 0.472~0.583 | <0.001 |



|               |        |       |             |        |
|---------------|--------|-------|-------------|--------|
| GN5           | <0.001 | 1.524 | 1.423~1.632 | <0.001 |
| NRG3          | <0.001 | 0.616 | 0.570~0.667 | <0.001 |
| CHGA          | <0.001 | 0.782 | 0.751~0.814 | <0.001 |
| PLK4          | <0.001 | 1.730 | 1.583~1.892 | <0.001 |
| GINS1         | <0.001 | 1.742 | 1.592~1.906 | <0.001 |
| CHPF2         | <0.001 | 1.893 | 1.707~2.100 | <0.001 |
| SH3PXD2B      | <0.001 | 1.917 | 1.724~2.130 | <0.001 |
| NCAPD2        | <0.001 | 1.598 | 1.481~1.724 | <0.001 |
| SHISA7        | <0.001 | 0.645 | 0.601~0.693 | <0.001 |
| GBP1          | <0.001 | 1.373 | 1.304~1.445 | <0.001 |
| SGSM1         | <0.001 | 0.532 | 0.480~0.590 | <0.001 |
| SDF4          | <0.001 | 2.087 | 1.852~2.352 | <0.001 |
| FSBP          | <0.001 | 2.362 | 2.055~2.716 | <0.001 |
| SLC25A21-AS1  | <0.001 | 0.553 | 0.503~0.609 | <0.001 |
| AGAP2-AS1     | <0.001 | 1.358 | 1.292~1.426 | <0.001 |
| HSPA7         | <0.001 | 1.307 | 1.251~1.364 | <0.001 |
| PTBP1         | <0.001 | 2.019 | 1.802~2.263 | <0.001 |
| PRC1          | <0.001 | 1.505 | 1.408~1.608 | <0.001 |
| TACC3         | <0.001 | 1.362 | 1.295~1.432 | <0.001 |
| MFAP2         | <0.001 | 1.322 | 1.263~1.383 | <0.001 |
| ESYT1         | <0.001 | 2.085 | 1.851~2.348 | <0.001 |
| MTMR11        | <0.001 | 1.676 | 1.542~1.823 | <0.001 |
| IBSP          | <0.001 | 1.328 | 1.268~1.390 | <0.001 |
| BTBD19        | <0.001 | 1.636 | 1.511~1.772 | <0.001 |
| ETV6          | <0.001 | 2.097 | 1.861~2.364 | <0.001 |
| DYRK3         | <0.001 | 1.796 | 1.634~1.975 | <0.001 |
| DNMT3A        | <0.001 | 2.010 | 1.796~2.250 | <0.001 |
| MIR155HG      | <0.001 | 1.975 | 1.769~2.204 | <0.001 |
| COL8A1        | <0.001 | 1.352 | 1.288~1.420 | <0.001 |
| ZWINT         | <0.001 | 1.532 | 1.430~1.641 | <0.001 |
| CDH22         | <0.001 | 0.652 | 0.609~0.699 | <0.001 |
| RAD54L        | <0.001 | 1.659 | 1.529~1.801 | <0.001 |
| TTYH3         | <0.001 | 1.633 | 1.509~1.767 | <0.001 |
| KDELR3        | <0.001 | 1.586 | 1.472~1.709 | <0.001 |
| CISH          | <0.001 | 1.753 | 1.601~1.919 | <0.001 |
| RAD18         | <0.001 | 2.211 | 1.946~2.513 | <0.001 |
| HMMR          | <0.001 | 1.694 | 1.556~1.844 | <0.001 |
| ADM           | <0.001 | 1.339 | 1.278~1.404 | <0.001 |
| HRH3          | <0.001 | 0.662 | 0.620~0.708 | <0.001 |
| RP11-356I2.4  | <0.001 | 2.337 | 2.038~2.679 | <0.001 |
| GBE1          | <0.001 | 1.647 | 1.520~1.785 | <0.001 |
| EYA3          | <0.001 | 2.860 | 2.415~3.386 | <0.001 |
| AK2           | <0.001 | 1.986 | 1.779~2.218 | <0.001 |
| SHC1          | <0.001 | 1.631 | 1.507~1.764 | <0.001 |
| MARVELD1      | <0.001 | 1.619 | 1.498~1.749 | <0.001 |
| TMEM63C       | <0.001 | 0.545 | 0.494~0.601 | <0.001 |
| CTD-2380F24.1 | <0.001 | 0.562 | 0.512~0.617 | <0.001 |
| KCNB1         | <0.001 | 0.578 | 0.529~0.631 | <0.001 |
| ASIC1         | <0.001 | 0.692 | 0.652~0.734 | <0.001 |
| SYP           | <0.001 | 0.700 | 0.662~0.742 | <0.001 |
| SCMH1         | <0.001 | 2.369 | 2.063~2.720 | <0.001 |
| ENPEP         | <0.001 | 1.684 | 1.549~1.831 | <0.001 |

|               |        |       |             |        |
|---------------|--------|-------|-------------|--------|
| KCNE3         | <0.001 | 1.706 | 1.566~1.858 | <0.001 |
| KIAA0040      | <0.001 | 1.565 | 1.456~1.681 | <0.001 |
| MYH9          | <0.001 | 1.695 | 1.558~1.845 | <0.001 |
| C11orf82      | <0.001 | 2.022 | 1.807~2.264 | <0.001 |
| ACTN4         | <0.001 | 1.832 | 1.663~2.019 | <0.001 |
| TAF12         | <0.001 | 2.038 | 1.819~2.284 | <0.001 |
| E2F2          | <0.001 | 1.745 | 1.596~1.907 | <0.001 |
| FANCC         | <0.001 | 2.142 | 1.897~2.419 | <0.001 |
| DPY19L1       | <0.001 | 1.696 | 1.559~1.846 | <0.001 |
| PITX1         | <0.001 | 1.467 | 1.380~1.560 | <0.001 |
| RTN1          | <0.001 | 0.768 | 0.736~0.801 | <0.001 |
| IFI30         | <0.001 | 1.315 | 1.258~1.373 | <0.001 |
| WDHD1         | <0.001 | 1.992 | 1.785~2.223 | <0.001 |
| TNK2          | <0.001 | 0.692 | 0.652~0.733 | <0.001 |
| LDHA          | <0.001 | 1.473 | 1.385~1.567 | <0.001 |
| MCM8          | <0.001 | 2.004 | 1.794~2.239 | <0.001 |
| PARP9         | <0.001 | 1.662 | 1.533~1.802 | <0.001 |
| CSMD3         | <0.001 | 0.568 | 0.519~0.622 | <0.001 |
| GRIN3A        | <0.001 | 0.400 | 0.346~0.463 | <0.001 |
| CDCA7L        | <0.001 | 1.551 | 1.446~1.663 | <0.001 |
| MYO5B         | <0.001 | 1.644 | 1.519~1.779 | <0.001 |
| PTTG1         | <0.001 | 1.392 | 1.320~1.467 | <0.001 |
| CDH18         | <0.001 | 0.593 | 0.546~0.645 | <0.001 |
| C9orf64       | <0.001 | 1.808 | 1.646~1.987 | <0.001 |
| RGR           | <0.001 | 0.668 | 0.626~0.712 | <0.001 |
| SLC25A18      | <0.001 | 0.687 | 0.648~0.729 | <0.001 |
| CNIH4         | <0.001 | 1.803 | 1.642~1.981 | <0.001 |
| CBX8          | <0.001 | 1.862 | 1.687~2.055 | <0.001 |
| MN1           | <0.001 | 0.532 | 0.481~0.588 | <0.001 |
| SLITRK5       | <0.001 | 0.541 | 0.491~0.597 | <0.001 |
| FAM126A       | <0.001 | 1.657 | 1.529~1.795 | <0.001 |
| SAMD9L        | <0.001 | 1.617 | 1.498~1.745 | <0.001 |
| REST          | <0.001 | 1.814 | 1.651~1.994 | <0.001 |
| CDK1          | <0.001 | 1.462 | 1.377~1.553 | <0.001 |
| TXNDC5        | <0.001 | 1.783 | 1.627~1.954 | <0.001 |
| AC003102.3    | <0.001 | 0.259 | 0.209~0.320 | <0.001 |
| PTPRT         | <0.001 | 0.565 | 0.517~0.619 | <0.001 |
| RP11-18114.10 | <0.001 | 0.553 | 0.504~0.608 | <0.001 |
| LRRTM4        | <0.001 | 0.565 | 0.517~0.619 | <0.001 |
| ESPL1         | <0.001 | 1.627 | 1.506~1.757 | <0.001 |
| CENPI         | <0.001 | 2.111 | 1.876~2.376 | <0.001 |
| MB21D1        | <0.001 | 2.235 | 1.968~2.539 | <0.001 |
| CDC25C        | <0.001 | 1.770 | 1.617~1.937 | <0.001 |
| FOXD2-AS1     | <0.001 | 1.779 | 1.624~1.948 | <0.001 |
| PDE2A         | <0.001 | 0.685 | 0.645~0.727 | <0.001 |
| C14orf132     | <0.001 | 0.675 | 0.634~0.718 | <0.001 |
| CLEC18B       | <0.001 | 1.482 | 1.393~1.577 | <0.001 |
| FAIM2         | <0.001 | 0.720 | 0.683~0.758 | <0.001 |
| CPLX2         | <0.001 | 0.791 | 0.762~0.821 | <0.001 |
| AP000330.8    | <0.001 | 2.586 | 2.226~3.004 | <0.001 |
| NAMPT         | <0.001 | 1.340 | 1.279~1.403 | <0.001 |
| SZRD1         | <0.001 | 2.165 | 1.917~2.446 | <0.001 |

|           |        |       |             |        |
|-----------|--------|-------|-------------|--------|
| SPATS2L   | <0.001 | 1.867 | 1.692~2.060 | <0.001 |
| CASP4     | <0.001 | 1.504 | 1.411~1.604 | <0.001 |
| SERP2     | <0.001 | 0.712 | 0.674~0.751 | <0.001 |
| PLEKHA4   | <0.001 | 1.350 | 1.288~1.415 | <0.001 |
| BTN2A2    | <0.001 | 1.705 | 1.568~1.855 | <0.001 |
| CAP1      | <0.001 | 1.950 | 1.755~2.166 | <0.001 |
| SLC1A5    | <0.001 | 1.608 | 1.492~1.732 | <0.001 |
| CAMSAP3   | <0.001 | 0.683 | 0.644~0.726 | <0.001 |
| LINC00152 | <0.001 | 1.338 | 1.278~1.401 | <0.001 |
| COLGALT1  | <0.001 | 1.881 | 1.703~2.077 | <0.001 |
| HAR1A     | <0.001 | 0.483 | 0.431~0.542 | <0.001 |
| PLAU      | <0.001 | 1.335 | 1.275~1.397 | <0.001 |
| LAMB1     | <0.001 | 1.423 | 1.346~1.504 | <0.001 |
| NSUN7     | <0.001 | 1.905 | 1.721~2.108 | <0.001 |
| LINC00672 | <0.001 | 0.661 | 0.619~0.705 | <0.001 |
| SLC12A5   | <0.001 | 0.712 | 0.675~0.751 | <0.001 |
| FAM133A   | <0.001 | 0.494 | 0.443~0.552 | <0.001 |
| HOXC10    | <0.001 | 1.405 | 1.332~1.482 | <0.001 |
| CLEC5A    | <0.001 | 1.477 | 1.390~1.571 | <0.001 |
| KIF15     | <0.001 | 1.679 | 1.548~1.822 | <0.001 |
| U2AF2     | <0.001 | 2.291 | 2.012~2.610 | <0.001 |
| ITPKC     | <0.001 | 1.735 | 1.591~1.891 | <0.001 |
| CDKN3     | <0.001 | 1.498 | 1.406~1.596 | <0.001 |
| CHEK2     | <0.001 | 1.801 | 1.642~1.975 | <0.001 |
| ZSCAN22   | <0.001 | 2.911 | 2.462~3.441 | <0.001 |
| CTPS1     | <0.001 | 1.958 | 1.763~2.175 | <0.001 |
| MCM2      | <0.001 | 1.599 | 1.486~1.721 | <0.001 |
| MRV11     | <0.001 | 0.586 | 0.539~0.637 | <0.001 |
| HOXA-AS3  | <0.001 | 2.397 | 2.090~2.748 | <0.001 |
| DDX20     | <0.001 | 2.416 | 2.105~2.773 | <0.001 |
| BST1      | <0.001 | 1.780 | 1.626~1.947 | <0.001 |
| GALNT2    | <0.001 | 1.964 | 1.768~2.183 | <0.001 |
| FCGR2A    | <0.001 | 1.463 | 1.378~1.552 | <0.001 |
| AFAP1L1   | <0.001 | 1.759 | 1.611~1.922 | <0.001 |
| PDLIM1    | <0.001 | 1.370 | 1.305~1.440 | <0.001 |
| SPC24     | <0.001 | 1.510 | 1.416~1.610 | <0.001 |
| PLK1      | <0.001 | 1.611 | 1.496~1.736 | <0.001 |
| SLC11A1   | <0.001 | 1.385 | 1.317~1.458 | <0.001 |
| CFI       | <0.001 | 1.371 | 1.305~1.440 | <0.001 |
| CLIC1     | <0.001 | 1.410 | 1.336~1.487 | <0.001 |
| ZNF816    | <0.001 | 2.323 | 2.037~2.649 | <0.001 |
| ARHGAP11B | <0.001 | 1.853 | 1.683~2.039 | <0.001 |
| SGOL2     | <0.001 | 2.014 | 1.806~2.245 | <0.001 |
| CA3       | <0.001 | 1.329 | 1.272~1.389 | <0.001 |
| NADK      | <0.001 | 2.200 | 1.947~2.487 | <0.001 |
| UGCG      | <0.001 | 1.793 | 1.638~1.963 | <0.001 |
| AVIL      | <0.001 | 1.419 | 1.344~1.498 | <0.001 |
| SMOC1     | <0.001 | 0.797 | 0.770~0.826 | <0.001 |
| ODF2      | <0.001 | 2.046 | 1.831~2.287 | <0.001 |
| HOXA1     | <0.001 | 2.619 | 2.256~3.040 | <0.001 |
| PARPBP    | <0.001 | 2.080 | 1.857~2.330 | <0.001 |
| FAM57B    | <0.001 | 0.718 | 0.682~0.756 | <0.001 |

|          |        |       |             |        |
|----------|--------|-------|-------------|--------|
| FAM155A  | <0.001 | 0.639 | 0.596~0.685 | <0.001 |
| KSR2     | <0.001 | 0.276 | 0.226~0.337 | <0.001 |
| PLP2     | <0.001 | 1.380 | 1.313~1.451 | <0.001 |
| BUB1B    | <0.001 | 1.558 | 1.455~1.669 | <0.001 |
| IFNGR2   | <0.001 | 1.971 | 1.775~2.189 | <0.001 |
| PRICKLE3 | <0.001 | 1.964 | 1.769~2.180 | <0.001 |
| POSTN    | <0.001 | 1.216 | 1.180~1.254 | <0.001 |
| CDCA4    | <0.001 | 1.866 | 1.694~2.055 | <0.001 |
| BCL2L12  | <0.001 | 1.659 | 1.534~1.794 | <0.001 |
| APOL4    | <0.001 | 1.478 | 1.392~1.570 | <0.001 |
| GDF15    | <0.001 | 1.338 | 1.279~1.400 | <0.001 |
| CALN1    | <0.001 | 0.573 | 0.525~0.624 | <0.001 |
| FCGR2C   | <0.001 | 1.362 | 1.299~1.429 | <0.001 |
| NRSN1    | <0.001 | 0.695 | 0.657~0.735 | <0.001 |
| TIMP1    | <0.001 | 1.209 | 1.174~1.244 | <0.001 |
| RAD54B   | <0.001 | 1.886 | 1.710~2.080 | <0.001 |
| CHRNA9   | <0.001 | 1.468 | 1.384~1.558 | <0.001 |
| KIFC1    | <0.001 | 1.497 | 1.407~1.593 | <0.001 |
| H19      | <0.001 | 1.194 | 1.162~1.227 | <0.001 |
| SCG3     | <0.001 | 0.781 | 0.752~0.811 | <0.001 |
| CDCA3    | <0.001 | 1.550 | 1.449~1.658 | <0.001 |
| DCBLD2   | <0.001 | 1.662 | 1.537~1.797 | <0.001 |
| PTX3     | <0.001 | 1.297 | 1.246~1.350 | <0.001 |
| MAP3K7CL | <0.001 | 1.584 | 1.476~1.700 | <0.001 |
| KCNK3    | <0.001 | 0.531 | 0.481~0.585 | <0.001 |
| WDR1     | <0.001 | 2.128 | 1.895~2.391 | <0.001 |
| SP140L   | <0.001 | 1.791 | 1.638~1.960 | <0.001 |
| HEATR2   | <0.001 | 1.882 | 1.708~2.075 | <0.001 |
| ANGPT2   | <0.001 | 1.480 | 1.393~1.572 | <0.001 |
| ITGB1    | <0.001 | 1.564 | 1.460~1.675 | <0.001 |
| SP100    | <0.001 | 1.668 | 1.542~1.804 | <0.001 |
| VAV3     | <0.001 | 1.683 | 1.554~1.823 | <0.001 |
| MYD88    | <0.001 | 1.742 | 1.600~1.897 | <0.001 |
| CD93     | <0.001 | 1.479 | 1.393~1.571 | <0.001 |
| C19orf55 | <0.001 | 1.848 | 1.682~2.031 | <0.001 |
| DGCR5    | <0.001 | 0.622 | 0.578~0.669 | <0.001 |
| SLC16A3  | <0.001 | 1.423 | 1.348~1.502 | <0.001 |
| GALNT13  | <0.001 | 0.703 | 0.667~0.742 | <0.001 |
| GRAMD1B  | <0.001 | 0.540 | 0.491~0.594 | <0.001 |
| SEC24D   | <0.001 | 1.764 | 1.617~1.924 | <0.001 |
| DOK3     | <0.001 | 1.714 | 1.579~1.861 | <0.001 |
| SERPINA3 | <0.001 | 1.257 | 1.214~1.302 | <0.001 |
| JUN      | <0.001 | 1.590 | 1.481~1.707 | <0.001 |
| SCRT1    | <0.001 | 0.682 | 0.643~0.723 | <0.001 |
| WDR77    | <0.001 | 2.675 | 2.302~3.109 | <0.001 |
| MMP9     | <0.001 | 1.226 | 1.188~1.264 | <0.001 |
| SBNO2    | <0.001 | 1.689 | 1.559~1.830 | <0.001 |
| MSR1     | <0.001 | 1.423 | 1.349~1.502 | <0.001 |
| PMM2     | <0.001 | 2.020 | 1.815~2.249 | <0.001 |
| TIMELESS | <0.001 | 1.670 | 1.544~1.805 | <0.001 |
| IKBIP    | <0.001 | 1.772 | 1.624~1.933 | <0.001 |
| LATS2    | <0.001 | 1.986 | 1.789~2.205 | <0.001 |

|             |        |       |             |        |
|-------------|--------|-------|-------------|--------|
| NUF2        | <0.001 | 1.523 | 1.429~1.624 | <0.001 |
| PTRF        | <0.001 | 1.527 | 1.431~1.628 | <0.001 |
| HS2ST1      | <0.001 | 1.945 | 1.758~2.153 | <0.001 |
| COL1A1      | <0.001 | 1.228 | 1.190~1.267 | <0.001 |
| C8orf4      | <0.001 | 1.386 | 1.319~1.457 | <0.001 |
| CHIC2       | <0.001 | 1.554 | 1.453~1.662 | <0.001 |
| RAD51       | <0.001 | 1.774 | 1.626~1.936 | <0.001 |
| HSPA6       | <0.001 | 1.396 | 1.327~1.469 | <0.001 |
| ITPRIPL1    | <0.001 | 1.869 | 1.700~2.056 | <0.001 |
| ITGB3BP     | <0.001 | 1.828 | 1.667~2.003 | <0.001 |
| ELFN2       | <0.001 | 0.683 | 0.645~0.724 | <0.001 |
| AC064875.2  | <0.001 | 1.550 | 1.450~1.657 | <0.001 |
| SERPINB8    | <0.001 | 1.755 | 1.611~1.911 | <0.001 |
| CREB5       | <0.001 | 1.575 | 1.470~1.687 | <0.001 |
| NOG         | <0.001 | 0.631 | 0.589~0.677 | <0.001 |
| FLNC        | <0.001 | 1.396 | 1.327~1.469 | <0.001 |
| HDAC1       | <0.001 | 2.043 | 1.833~2.277 | <0.001 |
| LOXL3       | <0.001 | 2.018 | 1.814~2.244 | <0.001 |
| SNAP91      | <0.001 | 0.712 | 0.677~0.750 | <0.001 |
| ADCK4       | <0.001 | 2.452 | 2.140~2.809 | <0.001 |
| NOL10       | <0.001 | 2.259 | 1.997~2.557 | <0.001 |
| TPTE2P1     | <0.001 | 0.505 | 0.455~0.560 | <0.001 |
| ISL2        | <0.001 | 1.945 | 1.759~2.152 | <0.001 |
| ACTL6B      | <0.001 | 0.747 | 0.715~0.781 | <0.001 |
| RDH10       | <0.001 | 1.423 | 1.349~1.501 | <0.001 |
| SPON2       | <0.001 | 1.357 | 1.296~1.421 | <0.001 |
| CYP17A1-AS1 | <0.001 | 0.593 | 0.548~0.642 | <0.001 |
| LMNB1       | <0.001 | 1.529 | 1.434~1.630 | <0.001 |
| CHAF1B      | <0.001 | 2.014 | 1.812~2.239 | <0.001 |
| AC002454.1  | <0.001 | 1.505 | 1.415~1.601 | <0.001 |
| SVOP        | <0.001 | 0.706 | 0.669~0.744 | <0.001 |
| HIST1H2AG   | <0.001 | 1.782 | 1.633~1.944 | <0.001 |
| PLAUR       | <0.001 | 1.378 | 1.313~1.447 | <0.001 |
| PPIC        | <0.001 | 1.605 | 1.495~1.724 | <0.001 |
| HSPG2       | <0.001 | 1.396 | 1.328~1.468 | <0.001 |
| E2F7        | <0.001 | 2.037 | 1.830~2.268 | <0.001 |
| FAM46A      | <0.001 | 1.700 | 1.569~1.842 | <0.001 |
| RCC2        | <0.001 | 1.925 | 1.744~2.124 | <0.001 |
| CD276       | <0.001 | 1.752 | 1.610~1.906 | <0.001 |
| CAPZA1      | <0.001 | 1.956 | 1.768~2.164 | <0.001 |
| PRLHR       | <0.001 | 0.497 | 0.448~0.552 | <0.001 |
| HN1L        | <0.001 | 1.883 | 1.712~2.071 | <0.001 |
| E2F8        | <0.001 | 2.074 | 1.859~2.315 | <0.001 |
| DUSP26      | <0.001 | 0.709 | 0.673~0.747 | <0.001 |
| CKAP2L      | <0.001 | 1.748 | 1.608~1.901 | <0.001 |
| TEF         | <0.001 | 0.583 | 0.537~0.632 | <0.001 |
| SH3GLB1     | <0.001 | 1.883 | 1.713~2.071 | <0.001 |
| CELSR1      | <0.001 | 1.557 | 1.457~1.664 | <0.001 |
| BRINP1      | <0.001 | 0.655 | 0.614~0.698 | <0.001 |
| NUSAP1      | <0.001 | 1.452 | 1.373~1.535 | <0.001 |
| CD248       | <0.001 | 1.385 | 1.319~1.454 | <0.001 |
| FAM13C      | <0.001 | 0.607 | 0.563~0.654 | <0.001 |

|               |        |       |             |        |
|---------------|--------|-------|-------------|--------|
| NNMT          | <0.001 | 1.235 | 1.197~1.275 | <0.001 |
| SLC26A2       | <0.001 | 1.883 | 1.713~2.070 | <0.001 |
| RHBDL3        | <0.001 | 0.658 | 0.618~0.700 | <0.001 |
| CASP8         | <0.001 | 1.887 | 1.716~2.076 | <0.001 |
| GDAP1L1       | <0.001 | 0.751 | 0.720~0.784 | <0.001 |
| NCAPH         | <0.001 | 1.616 | 1.504~1.736 | <0.001 |
| TTK           | <0.001 | 1.695 | 1.567~1.834 | <0.001 |
| FOXM1         | <0.001 | 1.493 | 1.406~1.585 | <0.001 |
| GABBR1        | <0.001 | 0.688 | 0.650~0.727 | <0.001 |
| ARHGAP11A     | <0.001 | 1.717 | 1.584~1.862 | <0.001 |
| SKA3          | <0.001 | 1.786 | 1.638~1.947 | <0.001 |
| VIM-AS1       | <0.001 | 2.626 | 2.274~3.033 | <0.001 |
| MAPK8IP2      | <0.001 | 0.699 | 0.663~0.737 | <0.001 |
| KPNA2         | <0.001 | 1.781 | 1.634~1.941 | <0.001 |
| RUNDC3A       | <0.001 | 0.744 | 0.712~0.777 | <0.001 |
| FCGBP         | <0.001 | 1.358 | 1.298~1.422 | <0.001 |
| CTD-3049M7.1  | <0.001 | 1.403 | 1.334~1.476 | <0.001 |
| CAPN5         | <0.001 | 1.598 | 1.490~1.714 | <0.001 |
| WDR62         | <0.001 | 1.723 | 1.589~1.868 | <0.001 |
| OSMR          | <0.001 | 1.545 | 1.448~1.648 | <0.001 |
| JPH3          | <0.001 | 0.731 | 0.698~0.766 | <0.001 |
| HOXC9         | <0.001 | 1.574 | 1.471~1.684 | <0.001 |
| SHCBP1        | <0.001 | 1.825 | 1.669~1.996 | <0.001 |
| ZWILCH        | <0.001 | 2.134 | 1.907~2.388 | <0.001 |
| MMD2          | <0.001 | 0.667 | 0.628~0.708 | <0.001 |
| RP11-143K11.1 | <0.001 | 0.624 | 0.582~0.669 | <0.001 |
| CENPN         | <0.001 | 1.716 | 1.584~1.859 | <0.001 |
| C2orf66       | <0.001 | 2.349 | 2.070~2.666 | <0.001 |
| PINK1-AS      | <0.001 | 2.747 | 2.365~3.191 | <0.001 |
| RBMS1         | <0.001 | 1.650 | 1.532~1.777 | <0.001 |
| ENHO          | <0.001 | 0.753 | 0.722~0.785 | <0.001 |
| COL5A1        | <0.001 | 1.352 | 1.293~1.414 | <0.001 |
| LOXL1         | <0.001 | 1.420 | 1.348~1.496 | <0.001 |
| ADAMTS7       | <0.001 | 1.700 | 1.572~1.839 | <0.001 |
| ALDH5A1       | <0.001 | 0.582 | 0.538~0.631 | <0.001 |
| SLC22A6       | <0.001 | 0.431 | 0.381~0.488 | <0.001 |
| RUNX1         | <0.001 | 1.587 | 1.482~1.699 | <0.001 |
| NDRG2         | <0.001 | 0.737 | 0.704~0.771 | <0.001 |
| TMEM71        | <0.001 | 1.847 | 1.687~2.022 | <0.001 |
| HOTAIRM1      | <0.001 | 1.355 | 1.296~1.417 | <0.001 |
| GABRB3        | <0.001 | 0.659 | 0.620~0.701 | <0.001 |
| SCN3B         | <0.001 | 0.685 | 0.648~0.725 | <0.001 |
| ACTN1         | <0.001 | 1.460 | 1.381~1.543 | <0.001 |
| CASP6         | <0.001 | 1.982 | 1.792~2.192 | <0.001 |
| PLOD2         | <0.001 | 1.594 | 1.488~1.707 | <0.001 |
| CEP89         | <0.001 | 2.292 | 2.028~2.589 | <0.001 |
| ZDHHC22       | <0.001 | 0.729 | 0.696~0.764 | <0.001 |
| AMER3         | <0.001 | 0.469 | 0.420~0.524 | <0.001 |
| SDC1          | <0.001 | 1.437 | 1.362~1.515 | <0.001 |
| FAM129A       | <0.001 | 1.630 | 1.517~1.751 | <0.001 |
| DUSP10        | <0.001 | 2.022 | 1.824~2.243 | <0.001 |
| NEIL3         | <0.001 | 2.154 | 1.924~2.410 | <0.001 |

|             |        |       |             |        |
|-------------|--------|-------|-------------|--------|
| MRC2        | <0.001 | 1.395 | 1.328~1.464 | <0.001 |
| COL1A2      | <0.001 | 1.278 | 1.233~1.325 | <0.001 |
| ABCC3       | <0.001 | 1.343 | 1.286~1.403 | <0.001 |
| TRAM2       | <0.001 | 1.806 | 1.656~1.970 | <0.001 |
| TK1         | <0.001 | 1.560 | 1.462~1.665 | <0.001 |
| SLC25A24    | <0.001 | 1.897 | 1.728~2.084 | <0.001 |
| CABP4       | <0.001 | 2.028 | 1.829~2.249 | <0.001 |
| DEPDC1B     | <0.001 | 1.823 | 1.670~1.991 | <0.001 |
| CALU        | <0.001 | 1.555 | 1.457~1.658 | <0.001 |
| LINC00634   | <0.001 | 0.713 | 0.678~0.749 | <0.001 |
| HOXD13      | <0.001 | 1.666 | 1.546~1.795 | <0.001 |
| HK2         | <0.001 | 1.634 | 1.521~1.756 | <0.001 |
| IGFBP3      | <0.001 | 1.294 | 1.246~1.343 | <0.001 |
| TUBB6       | <0.001 | 1.573 | 1.473~1.681 | <0.001 |
| MIR4435-1HG | <0.001 | 1.358 | 1.299~1.420 | <0.001 |
| TMEM2       | <0.001 | 1.776 | 1.633~1.931 | <0.001 |
| CENPE       | <0.001 | 1.999 | 1.807~2.212 | <0.001 |
| SLC2A10     | <0.001 | 1.777 | 1.634~1.932 | <0.001 |
| CHGB        | <0.001 | 0.735 | 0.703~0.769 | <0.001 |
| AURKB       | <0.001 | 1.468 | 1.388~1.553 | <0.001 |
| SLC25A48    | <0.001 | 0.741 | 0.709~0.774 | <0.001 |
| CACNG2      | <0.001 | 0.533 | 0.486~0.584 | <0.001 |
| BIRC5       | <0.001 | 1.485 | 1.402~1.573 | <0.001 |
| PSRC1       | <0.001 | 1.644 | 1.529~1.767 | <0.001 |
| C19orf40    | <0.001 | 2.551 | 2.225~2.924 | <0.001 |
| HOXA2       | <0.001 | 1.700 | 1.574~1.837 | <0.001 |
| EMILIN2     | <0.001 | 1.477 | 1.395~1.563 | <0.001 |
| HJURP       | <0.001 | 1.628 | 1.517~1.748 | <0.001 |
| TEAD3       | <0.001 | 1.803 | 1.655~1.964 | <0.001 |
| FBXW4       | <0.001 | 0.435 | 0.386~0.491 | <0.001 |
| SERPINE1    | <0.001 | 1.306 | 1.256~1.358 | <0.001 |
| HOXC6       | <0.001 | 1.751 | 1.614~1.899 | <0.001 |
| TRIP13      | <0.001 | 1.883 | 1.718~2.064 | <0.001 |
| CENPL       | <0.001 | 2.284 | 2.026~2.575 | <0.001 |
| MND1        | <0.001 | 1.793 | 1.647~1.951 | <0.001 |
| ZNF436      | <0.001 | 1.717 | 1.588~1.857 | <0.001 |
| CDK6        | <0.001 | 1.641 | 1.527~1.763 | <0.001 |
| SPRY1       | <0.001 | 1.468 | 1.389~1.552 | <0.001 |
| CLSPN       | <0.001 | 1.851 | 1.693~2.024 | <0.001 |
| CEP112      | <0.001 | 2.086 | 1.876~2.321 | <0.001 |
| DDOST       | <0.001 | 2.126 | 1.906~2.372 | <0.001 |
| VMP1        | <0.001 | 1.662 | 1.544~1.789 | <0.001 |
| UBE2C       | <0.001 | 1.380 | 1.317~1.445 | <0.001 |
| BRIP1       | <0.001 | 1.699 | 1.573~1.834 | <0.001 |
| CLCF1       | <0.001 | 1.524 | 1.434~1.620 | <0.001 |
| EMP1        | <0.001 | 1.432 | 1.360~1.509 | <0.001 |
| BACE2       | <0.001 | 1.687 | 1.564~1.820 | <0.001 |
| LCTL        | <0.001 | 2.031 | 1.833~2.249 | <0.001 |
| IL13RA2     | <0.001 | 1.404 | 1.337~1.475 | <0.001 |
| MAGOH       | <0.001 | 1.926 | 1.752~2.117 | <0.001 |
| EPHB2       | <0.001 | 1.652 | 1.537~1.776 | <0.001 |
| AMZ1        | <0.001 | 0.504 | 0.457~0.557 | <0.001 |

|         |        |       |             |        |
|---------|--------|-------|-------------|--------|
| NDE1    | <0.001 | 1.780 | 1.638~1.934 | <0.001 |
| RCC1    | <0.001 | 1.907 | 1.738~2.093 | <0.001 |
| TFPI    | <0.001 | 1.517 | 1.429~1.611 | <0.001 |
| UNC79   | <0.001 | 0.502 | 0.455~0.555 | <0.001 |
| COL6A2  | <0.001 | 1.292 | 1.246~1.341 | <0.001 |
| FN1     | <0.001 | 1.359 | 1.300~1.420 | <0.001 |
| IQGAP2  | <0.001 | 1.601 | 1.496~1.712 | <0.001 |
| ABCC8   | <0.001 | 0.741 | 0.710~0.774 | <0.001 |
| CDKN2C  | <0.001 | 1.536 | 1.444~1.634 | <0.001 |
| POLQ    | <0.001 | 2.717 | 2.354~3.136 | <0.001 |
| IGF2BP2 | <0.001 | 1.498 | 1.413~1.587 | <0.001 |
| LOXL2   | <0.001 | 1.442 | 1.368~1.519 | <0.001 |
| SKA1    | <0.001 | 1.847 | 1.692~2.017 | <0.001 |
| SPOCD1  | <0.001 | 1.274 | 1.231~1.319 | <0.001 |
| BRCA1   | <0.001 | 2.217 | 1.978~2.484 | <0.001 |
| TTF2    | <0.001 | 2.142 | 1.921~2.388 | <0.001 |
| SRPX2   | <0.001 | 1.409 | 1.342~1.480 | <0.001 |
| GPX8    | <0.001 | 1.507 | 1.422~1.598 | <0.001 |
| CSDC2   | <0.001 | 0.693 | 0.658~0.730 | <0.001 |
| CENPK   | <0.001 | 1.675 | 1.557~1.803 | <0.001 |
| SOCS3   | <0.001 | 1.319 | 1.268~1.372 | <0.001 |
| REPS2   | <0.001 | 0.545 | 0.500~0.594 | <0.001 |
| EMP3    | <0.001 | 1.318 | 1.267~1.371 | <0.001 |
| PVT1    | <0.001 | 1.621 | 1.513~1.736 | <0.001 |
| ECE1    | <0.001 | 1.870 | 1.711~2.044 | <0.001 |
| MLF1IP  | <0.001 | 1.557 | 1.462~1.657 | <0.001 |
| PBX3    | <0.001 | 1.929 | 1.757~2.117 | <0.001 |
| SHOX2   | <0.001 | 1.530 | 1.441~1.626 | <0.001 |
| EXO1    | <0.001 | 1.942 | 1.767~2.134 | <0.001 |
| CDCA2   | <0.001 | 1.951 | 1.774~2.145 | <0.001 |
| TPX2    | <0.001 | 1.531 | 1.441~1.626 | <0.001 |
| RASL10A | <0.001 | 0.737 | 0.706~0.770 | <0.001 |
| FSTL1   | <0.001 | 1.498 | 1.415~1.586 | <0.001 |
| EVC2    | <0.001 | 2.337 | 2.073~2.636 | <0.001 |
| CDHR1   | <0.001 | 0.635 | 0.596~0.678 | <0.001 |
| ATOH8   | <0.001 | 0.676 | 0.639~0.714 | <0.001 |
| TGFB2   | <0.001 | 1.471 | 1.393~1.554 | <0.001 |
| SGOL1   | <0.001 | 1.835 | 1.684~1.999 | <0.001 |
| GTSE1   | <0.001 | 1.632 | 1.523~1.748 | <0.001 |
| CD58    | <0.001 | 1.719 | 1.593~1.856 | <0.001 |
| FAM64A  | <0.001 | 1.485 | 1.405~1.570 | <0.001 |
| ASF1B   | <0.001 | 1.589 | 1.489~1.696 | <0.001 |
| LEPRE1  | <0.001 | 1.849 | 1.696~2.016 | <0.001 |
| FNDC3B  | <0.001 | 1.780 | 1.641~1.930 | <0.001 |
| CCNB2   | <0.001 | 1.501 | 1.418~1.589 | <0.001 |
| ANXA2   | <0.001 | 1.369 | 1.310~1.430 | <0.001 |
| NSG2    | <0.001 | 0.764 | 0.736~0.794 | <0.001 |
| PDIA4   | <0.001 | 1.760 | 1.626~1.906 | <0.001 |
| NEK2    | <0.001 | 1.696 | 1.575~1.826 | <0.001 |
| PDZD4   | <0.001 | 0.656 | 0.619~0.696 | <0.001 |
| TNFAIP6 | <0.001 | 1.494 | 1.412~1.581 | <0.001 |
| VEGFA   | <0.001 | 1.294 | 1.248~1.342 | <0.001 |



|             |        |       |             |        |
|-------------|--------|-------|-------------|--------|
| SYDE1       | <0.001 | 1.887 | 1.726~2.063 | <0.001 |
| TNR         | <0.001 | 0.716 | 0.683~0.750 | <0.001 |
| CCNA2       | <0.001 | 1.736 | 1.607~1.876 | <0.001 |
| PYGL        | <0.001 | 1.574 | 1.477~1.677 | <0.001 |
| ITGA5       | <0.001 | 1.538 | 1.448~1.634 | <0.001 |
| NDC1        | <0.001 | 2.696 | 2.346~3.097 | <0.001 |
| PHTF1       | <0.001 | 2.151 | 1.932~2.394 | <0.001 |
| CCDC18      | <0.001 | 2.065 | 1.866~2.286 | <0.001 |
| RAB42       | <0.001 | 1.701 | 1.579~1.832 | <0.001 |
| COL3A1      | <0.001 | 1.261 | 1.221~1.303 | <0.001 |
| ALDOC       | <0.001 | 0.750 | 0.720~0.781 | <0.001 |
| KCNIP2      | <0.001 | 0.703 | 0.669~0.739 | <0.001 |
| ARPP21      | <0.001 | 0.667 | 0.630~0.706 | <0.001 |
| IGFBP5      | <0.001 | 1.442 | 1.370~1.517 | <0.001 |
| CTHRC1      | <0.001 | 1.404 | 1.339~1.472 | <0.001 |
| KIF18A      | <0.001 | 2.204 | 1.975~2.461 | <0.001 |
| PLOD1       | <0.001 | 1.785 | 1.647~1.935 | <0.001 |
| KIF14       | <0.001 | 2.246 | 2.007~2.514 | <0.001 |
| BUB1        | <0.001 | 1.687 | 1.569~1.814 | <0.001 |
| EFNB1       | <0.001 | 1.952 | 1.779~2.143 | <0.001 |
| ADAM12      | <0.001 | 1.569 | 1.474~1.671 | <0.001 |
| KLHDC8A     | <0.001 | 1.462 | 1.387~1.541 | <0.001 |
| FRMD8       | <0.001 | 2.244 | 2.006~2.511 | <0.001 |
| TUBA1C      | <0.001 | 1.464 | 1.388~1.543 | <0.001 |
| ORC1        | <0.001 | 2.167 | 1.947~2.412 | <0.001 |
| NDC80       | <0.001 | 1.596 | 1.496~1.703 | <0.001 |
| TEAD2       | <0.001 | 1.616 | 1.513~1.728 | <0.001 |
| IQGAP1      | <0.001 | 1.810 | 1.667~1.964 | <0.001 |
| MYBL2       | <0.001 | 1.479 | 1.402~1.562 | <0.001 |
| CEP135      | <0.001 | 1.799 | 1.659~1.952 | <0.001 |
| RP1-293L6.1 | <0.001 | 0.507 | 0.462~0.557 | <0.001 |
| ECT2        | <0.001 | 1.810 | 1.668~1.964 | <0.001 |
| LMNB2       | <0.001 | 2.021 | 1.834~2.226 | <0.001 |
| HOXA3       | <0.001 | 1.613 | 1.510~1.722 | <0.001 |
| TROAP       | <0.001 | 1.558 | 1.466~1.656 | <0.001 |
| DGCR6       | <0.001 | 0.701 | 0.668~0.736 | <0.001 |
| GNAL        | <0.001 | 0.544 | 0.501~0.592 | <0.001 |
| MCAM        | <0.001 | 1.610 | 1.508~1.719 | <0.001 |
| NCAPG       | <0.001 | 1.688 | 1.571~1.814 | <0.001 |
| SLC30A7     | <0.001 | 2.518 | 2.219~2.858 | <0.001 |
| IQGAP3      | <0.001 | 1.703 | 1.583~1.832 | <0.001 |
| NEK6        | <0.001 | 1.816 | 1.674~1.971 | <0.001 |
| STEAP3      | <0.001 | 1.468 | 1.393~1.548 | <0.001 |
| NFE2L3      | <0.001 | 2.100 | 1.897~2.324 | <0.001 |
| SLC39A1     | <0.001 | 2.279 | 2.037~2.550 | <0.001 |
| AC062021.1  | <0.001 | 0.628 | 0.590~0.669 | <0.001 |
| TTC26       | <0.001 | 2.159 | 1.944~2.397 | <0.001 |
| FBLIM1      | <0.001 | 1.481 | 1.404~1.562 | <0.001 |
| CRTAC1      | <0.001 | 0.691 | 0.657~0.726 | <0.001 |
| VASP        | <0.001 | 1.837 | 1.691~1.995 | <0.001 |
| CENPA       | <0.001 | 1.677 | 1.563~1.799 | <0.001 |
| FKBP9       | <0.001 | 1.649 | 1.541~1.764 | <0.001 |

|               |        |       |             |        |
|---------------|--------|-------|-------------|--------|
| FAM83D        | <0.001 | 1.748 | 1.621~1.884 | <0.001 |
| STIL          | <0.001 | 2.264 | 2.028~2.527 | <0.001 |
| RRM2          | <0.001 | 1.506 | 1.425~1.591 | <0.001 |
| HOXD9         | <0.001 | 1.469 | 1.395~1.547 | <0.001 |
| CDC20         | <0.001 | 1.488 | 1.411~1.570 | <0.001 |
| HOXA4         | <0.001 | 1.519 | 1.436~1.607 | <0.001 |
| RP11-189B4.6  | <0.001 | 1.469 | 1.396~1.547 | <0.001 |
| GNG12         | <0.001 | 1.631 | 1.527~1.741 | <0.001 |
| HOXA-AS2      | <0.001 | 1.558 | 1.468~1.653 | <0.001 |
| DEPDC1        | <0.001 | 1.915 | 1.755~2.088 | <0.001 |
| CDK2          | <0.001 | 1.642 | 1.537~1.754 | <0.001 |
| HOXA7         | <0.001 | 1.523 | 1.440~1.611 | <0.001 |
| CENPF         | <0.001 | 1.505 | 1.425~1.590 | <0.001 |
| CRY2          | <0.001 | 0.475 | 0.430~0.524 | <0.001 |
| KCNIP3        | <0.001 | 0.658 | 0.622~0.696 | <0.001 |
| PDIA5         | <0.001 | 1.770 | 1.640~1.909 | <0.001 |
| BCAT1         | <0.001 | 1.552 | 1.464~1.645 | <0.001 |
| FAM114A1      | <0.001 | 1.829 | 1.688~1.982 | <0.001 |
| ARAP3         | <0.001 | 1.684 | 1.572~1.805 | <0.001 |
| STK40         | <0.001 | 2.307 | 2.065~2.578 | <0.001 |
| HOXA10        | <0.001 | 1.525 | 1.442~1.613 | <0.001 |
| DLGAP5        | <0.001 | 1.724 | 1.604~1.854 | <0.001 |
| HOXD11        | <0.001 | 1.555 | 1.467~1.648 | <0.001 |
| TXLNA         | <0.001 | 2.535 | 2.242~2.867 | <0.001 |
| MMP14         | <0.001 | 1.465 | 1.392~1.540 | <0.001 |
| WEE1          | <0.001 | 1.616 | 1.517~1.721 | <0.001 |
| CDC6          | <0.001 | 1.927 | 1.767~2.101 | <0.001 |
| LAMC1         | <0.001 | 1.592 | 1.497~1.692 | <0.001 |
| CCDC109B      | <0.001 | 1.563 | 1.474~1.658 | <0.001 |
| RP5-1119A7.17 | <0.001 | 0.618 | 0.580~0.658 | <0.001 |
| CXXC11        | <0.001 | 0.679 | 0.645~0.714 | <0.001 |
| KIF23         | <0.001 | 1.701 | 1.587~1.823 | <0.001 |
| ANXA1         | <0.001 | 1.341 | 1.290~1.393 | <0.001 |
| TNC           | <0.001 | 1.462 | 1.391~1.537 | <0.001 |
| PDPN          | <0.001 | 1.352 | 1.300~1.406 | <0.001 |
| MSN           | <0.001 | 1.583 | 1.491~1.681 | <0.001 |
| DRAXIN        | <0.001 | 1.668 | 1.561~1.783 | <0.001 |
| METTL7B       | <0.001 | 1.367 | 1.312~1.423 | <0.001 |
| CHI3L1        | <0.001 | 1.200 | 1.172~1.229 | <0.001 |
| KIF20A        | <0.001 | 1.683 | 1.573~1.800 | <0.001 |
| CRNDE         | <0.001 | 1.444 | 1.377~1.514 | <0.001 |
| CEP55         | <0.001 | 1.839 | 1.700~1.990 | <0.001 |
| GPX7          | <0.001 | 2.000 | 1.829~2.188 | <0.001 |
| MELK          | <0.001 | 1.652 | 1.549~1.763 | <0.001 |
| ASPM          | <0.001 | 1.839 | 1.700~1.989 | <0.001 |
| KCNJ11        | <0.001 | 0.563 | 0.523~0.607 | <0.001 |
| VIM           | <0.001 | 1.488 | 1.414~1.566 | <0.001 |
| HOXD10        | <0.001 | 1.550 | 1.465~1.640 | <0.001 |
| TGIF1         | <0.001 | 1.762 | 1.638~1.895 | <0.001 |
| CCNB1         | <0.001 | 1.650 | 1.548~1.760 | <0.001 |
| HOXA5         | <0.001 | 1.644 | 1.542~1.752 | <0.001 |
| CDCA8         | <0.001 | 1.708 | 1.595~1.829 | <0.001 |

|           |        |       |             |        |
|-----------|--------|-------|-------------|--------|
| RGS16     | <0.001 | 1.612 | 1.517~1.713 | <0.001 |
| AURKA     | <0.001 | 1.794 | 1.665~1.932 | <0.001 |
| COL4A2    | <0.001 | 1.378 | 1.323~1.435 | <0.001 |
| COL4A1    | <0.001 | 1.353 | 1.302~1.406 | <0.001 |
| SMC4      | <0.001 | 1.651 | 1.550~1.759 | <0.001 |
| GJC1      | <0.001 | 1.824 | 1.691~1.968 | <0.001 |
| SERPINH1  | <0.001 | 1.506 | 1.430~1.585 | <0.001 |
| GAS2L3    | <0.001 | 1.880 | 1.737~2.035 | <0.001 |
| COL5A2    | <0.001 | 1.488 | 1.415~1.563 | <0.001 |
| IGF2BP3   | <0.001 | 1.595 | 1.505~1.691 | <0.001 |
| HIST1H2BK | <0.001 | 1.621 | 1.526~1.722 | <0.001 |
| KIF4A     | <0.001 | 1.764 | 1.643~1.893 | <0.001 |
| TAGLN2    | <0.001 | 1.546 | 1.465~1.631 | <0.001 |
| EN1       | <0.001 | 1.618 | 1.525~1.717 | <0.001 |
| KIF2C     | <0.001 | 1.652 | 1.554~1.756 | <0.001 |
| IGFBP2    | <0.001 | 1.321 | 1.277~1.367 | <0.001 |
| TNFRSF12A | <0.001 | 1.432 | 1.372~1.496 | <0.001 |
| PLAT      | <0.001 | 1.511 | 1.439~1.588 | <0.001 |

Abbreviation: CGGA, Chinese Glioma Genome Atlas; KM, Kaplan-Meier method, HR, hazard ratio; CI, confidence interval.
